# Supplementary material for: Bioactive Indolyl Diketopiperazines from the Marine Derived Endophytic Aspergillus versicolor DY180635
Source: PubMed Central journal article supplement (PMC7401283; doi:10.3390/md18070338), 2020-06-28
Supplement: marinedrugs-18-00338-s001.pdf [file marinedrugs-18-00338-s001.pdf]

# **Bioactive Indolyl Diketopiperazines from the Marine Derived Endophytic *Aspergillus versicolor* DY180635**

Yi Ding, Xiaojing Zhu, LiLing Hao, MengYao Zhao, Qiang Hua, and Faliang An \*

State Key Laboratory of Bioreactor Engineering, East China University of Science and Technology, 130  
Mei Long Road, Shanghai 200237, People's Republic of China

\* Corresponding author: E-mail address: [flan2016@ecust.edu.cn](mailto:flan2016@ecust.edu.cn); Tel.: +86-21-6425-1185 (F.A.).

# Supporting Information

## Table of contents

|                                                                                                          |    |
|----------------------------------------------------------------------------------------------------------|----|
| <b>Figure S1.</b> <sup>1</sup> H NMR spectra (600 MHz, DMSO- <i>d</i> <sub>6</sub> ) of <b>1</b> .....   | 4  |
| <b>Figure S2.</b> <sup>13</sup> C NMR spectra (150 MHz, DMSO- <i>d</i> <sub>6</sub> ) of <b>1</b> .....  | 5  |
| <b>Figure S3.</b> HMQC spectra (DMSO- <i>d</i> <sub>6</sub> ) of <b>1</b> .....                          | 5  |
| <b>Figure S4.</b> HMBC spectra (DMSO- <i>d</i> <sub>6</sub> ) of <b>1</b> .....                          | 6  |
| <b>Figure S5.</b> ROESY spectra (DMSO- <i>d</i> <sub>6</sub> ) of <b>1</b> .....                         | 7  |
| <b>Figure S6.</b> UV spectra (MeOH) of <b>1</b> .....                                                    | 7  |
| <b>Figure S7.</b> ECD spectra (MeOH) of <b>1</b> .....                                                   | 7  |
| <b>Figure S8.</b> HRESIMS spectra of <b>1</b> .....                                                      | 8  |
| <b>Figure S9.</b> <sup>1</sup> H NMR spectra (600 MHz, DMSO- <i>d</i> <sub>6</sub> ) of <b>2</b> .....   | 8  |
| <b>Figure S10.</b> <sup>13</sup> C NMR spectra (150 MHz, DMSO- <i>d</i> <sub>6</sub> ) of <b>2</b> ..... | 9  |
| <b>Figure S11.</b> HMQC spectra (DMSO- <i>d</i> <sub>6</sub> ) of <b>2</b> .....                         | 9  |
| <b>Figure S12.</b> HMBC spectra (DMSO- <i>d</i> <sub>6</sub> ) of <b>2</b> .....                         | 10 |
| <b>Figure S13.</b> UV spectra (MeOH) of <b>2</b> .....                                                   | 10 |
| <b>Figure S14.</b> ECD spectra (MeOH) of <b>2</b> .....                                                  | 11 |
| <b>Figure S15.</b> HRESIMS spectra of <b>2</b> .....                                                     | 11 |
| <b>Figure S16.</b> <sup>1</sup> H NMR spectra (600 MHz, DMSO- <i>d</i> <sub>6</sub> ) of <b>3</b> .....  | 12 |
| <b>Figure S17.</b> <sup>13</sup> C NMR spectra (150 MHz, DMSO- <i>d</i> <sub>6</sub> ) of <b>3</b> ..... | 12 |
| <b>Figure S18.</b> HMQC spectra (DMSO- <i>d</i> <sub>6</sub> ) of <b>3</b> .....                         | 13 |
| <b>Figure S19.</b> HMBC spectra (DMSO- <i>d</i> <sub>6</sub> ) of <b>3</b> .....                         | 13 |
| <b>Figure S20.</b> ROESY spectra (DMSO- <i>d</i> <sub>6</sub> ) of <b>3</b> .....                        | 14 |
| <b>Figure S21.</b> UV spectra (MeOH) of <b>3</b> .....                                                   | 14 |
| <b>Figure S22.</b> ECD spectra (MeOH) of <b>3</b> .....                                                  | 15 |
| <b>Figure S23.</b> HRESIMS spectra of <b>3</b> .....                                                     | 15 |
| <b>Figure S24.</b> <sup>1</sup> H NMR spectra (600 MHz, DMSO- <i>d</i> <sub>6</sub> ) of <b>4</b> .....  | 16 |
| <b>Figure S25.</b> <sup>13</sup> C NMR spectra (150 MHz, DMSO- <i>d</i> <sub>6</sub> ) of <b>4</b> ..... | 16 |
| <b>Figure S26.</b> HMQC spectra (DMSO- <i>d</i> <sub>6</sub> ) of <b>4</b> .....                         | 17 |
| <b>Figure S27.</b> HMBC spectra (DMSO- <i>d</i> <sub>6</sub> ) of <b>4</b> .....                         | 17 |
| <b>Figure S28.</b> UV spectra (MeOH) of <b>4</b> .....                                                   | 18 |
| <b>Figure S29.</b> ECD spectra (MeOH) of <b>4</b> .....                                                  | 18 |
| <b>Figure S30.</b> ECD spectra (MeOH) of (+) - <b>4</b> .....                                            | 19 |
| <b>Figure S31.</b> ECD spectra (MeOH) of (-) - <b>4</b> .....                                            | 19 |
| <b>Figure S32.</b> HRESIMS spectra of <b>4</b> .....                                                     | 20 |
| <b>Figure S33.</b> <sup>1</sup> H NMR spectra (600 MHz, CDCl <sub>3</sub> ) of <b>5</b> .....            | 20 |
| <b>Figure S34.</b> <sup>13</sup> C NMR spectra (150 MHz, CDCl <sub>3</sub> ) of <b>5</b> .....           | 21 |

|                                                                                                                                                                           |                                     |
|---------------------------------------------------------------------------------------------------------------------------------------------------------------------------|-------------------------------------|
| <b>Figure S35.</b> HMQC spectra (CDCl <sub>3</sub> ) of <b>5</b> .....                                                                                                    | 21                                  |
| <b>Figure S36.</b> HMBC spectra (CDCl <sub>3</sub> ) of <b>5</b> .....                                                                                                    | 22                                  |
| <b>Figure S37.</b> UV spectra (MeOH) of <b>5</b> .....                                                                                                                    | 22                                  |
| <b>Figure S38.</b> ECD spectra (MeOH) of <b>5</b> .....                                                                                                                   | 23                                  |
| <b>Figure S39.</b> HRESIMS spectra of <b>5</b> .....                                                                                                                      | 23                                  |
| <b>Figure S40.</b> <sup>1</sup> H NMR spectra (600 MHz, CDCl <sub>3</sub> ) of <b>6</b> .....                                                                             | 24                                  |
| <b>Figure S41.</b> <sup>13</sup> C NMR spectra (150 MHz, CDCl <sub>3</sub> ) of <b>6</b> .....                                                                            | 24                                  |
| <b>Figure S42.</b> HMQC spectra (CDCl <sub>3</sub> ) of <b>6</b> .....                                                                                                    | 25                                  |
| <b>Figure S43.</b> HMBC spectra (CDCl <sub>3</sub> ) of <b>6</b> .....                                                                                                    | 25                                  |
| <b>Figure S44.</b> UV spectra (MeOH) of <b>6</b> .....                                                                                                                    | 26                                  |
| <b>Figure S45.</b> ECD spectra (MeOH) of <b>6</b> .....                                                                                                                   | 26                                  |
| <b>Figure S46.</b> HRESIMS spectra of <b>6</b> .....                                                                                                                      | 27                                  |
| <b>Table S1.</b> Energies of conformers of <b>1</b> with Boltzmann distribution over 1% at MMFF.....                                                                      | 27                                  |
| <b>Table S2.</b> Gibbs free energies <sup>a</sup> and equilibrium populations <sup>b</sup> of low-energy conformers of <b>1</b> .....                                     | 27                                  |
| <b>Table S3.</b> Cartesian coordinates for the low-energy reoptimized MMFF conformers of <b>1</b> at B3LYP/6-31+G (d, p) level of theory in gas. ....                     | 28                                  |
| <b>Table S4.</b> Energies of conformers of <b>4b</b> with Boltzmann distribution over 1% at MMFF.....                                                                     | 45                                  |
| <b>Table S5.</b> Gibbs free energies <sup>a</sup> and equilibrium populations <sup>b</sup> of low-energy conformers of <b>4b</b> .....                                    | 45                                  |
| <b>Table S6</b> Cartesian coordinates for the low-energy reoptimized MMFF conformers of <b>4b</b> at B3LYP/6-31+G (d, p) level of theory in gas. ....                     | 46                                  |
| <b>Table S5.</b> Gibbs free energies <sup>a</sup> and equilibrium populations <sup>b</sup> of low-energy conformers of (-)- <b>4</b> . <b>Error!</b>                      |                                     |
| <b>Bookmark not defined.</b>                                                                                                                                              |                                     |
| <b>Table S6.</b> Cartesian coordinates for the low-energy reoptimized MMFF conformers of (-)- <b>4</b> at B3LYP/6-31+G (d, p) level of theory in CH <sub>3</sub> OH. .... | <b>Error! Bookmark not defined.</b> |

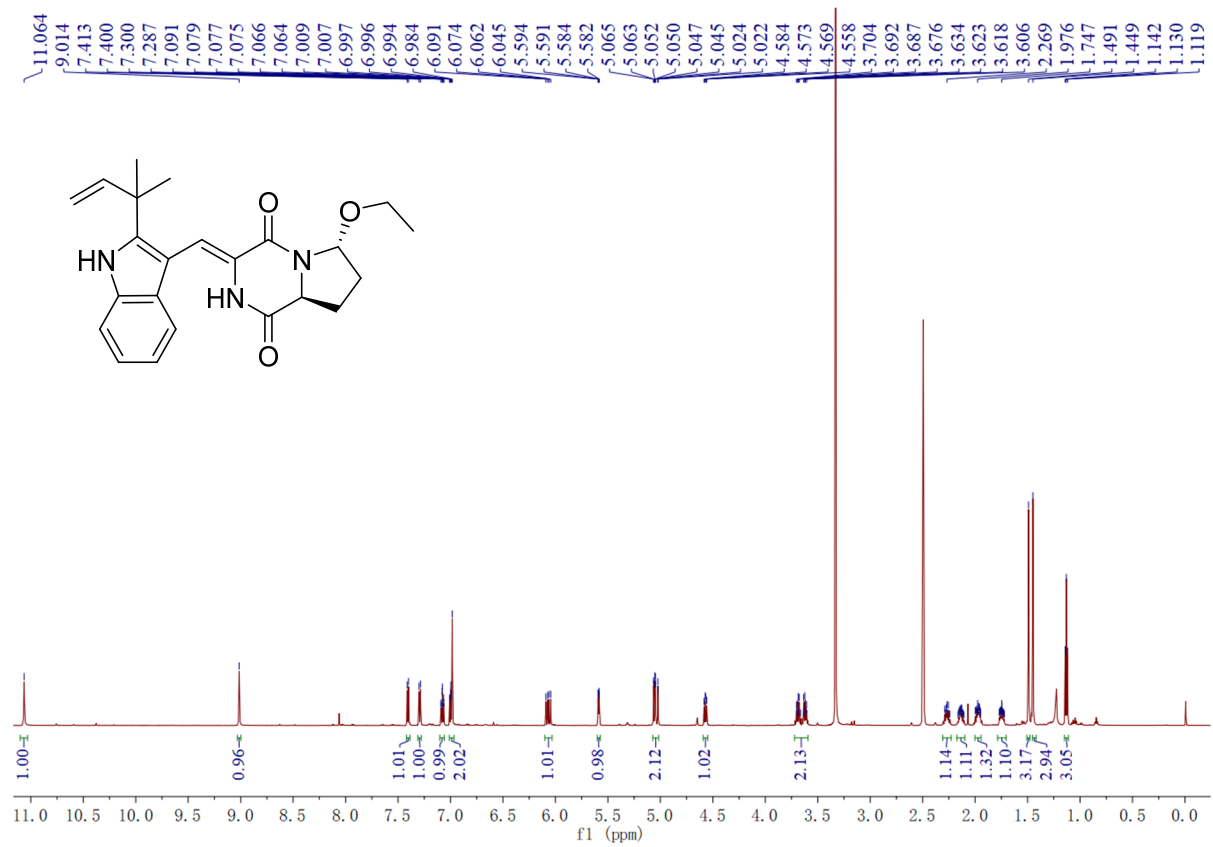

Figure S1. <sup>1</sup>H NMR spectra (600 MHz, DMSO-*d*<sub>6</sub>) of 1.



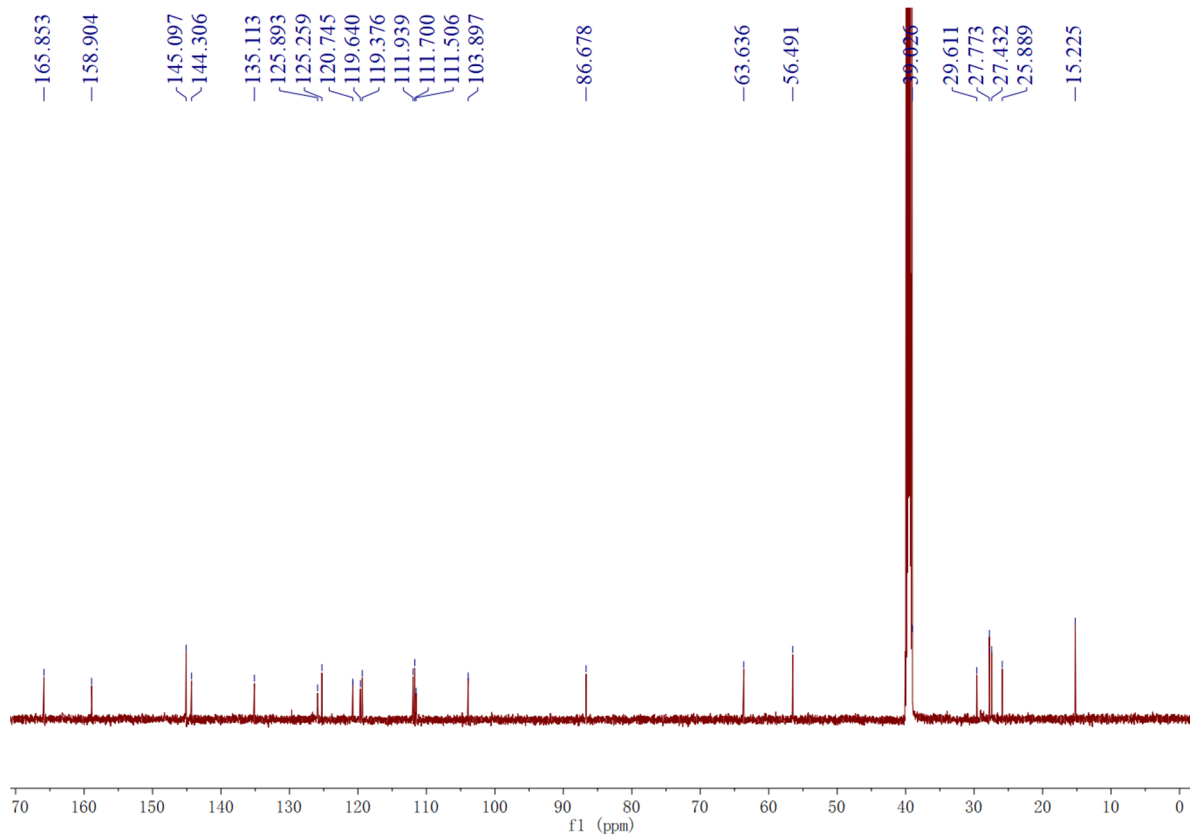

Figure S2.  $^{13}\text{C}$  NMR spectra (150 MHz,  $\text{DMSO-}d_6$ ) of **1**.

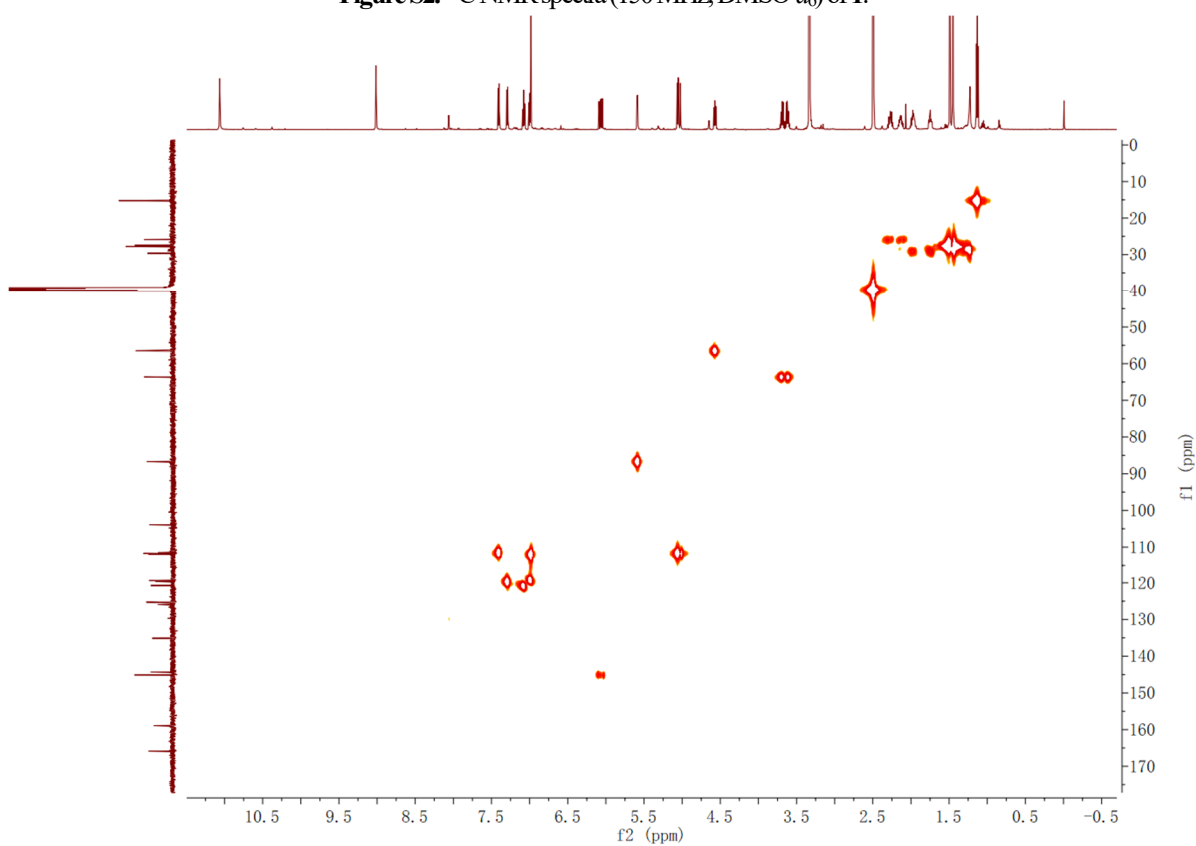

Figure S3. HMQC spectra ( $\text{DMSO-}d_6$ ) of **1**.

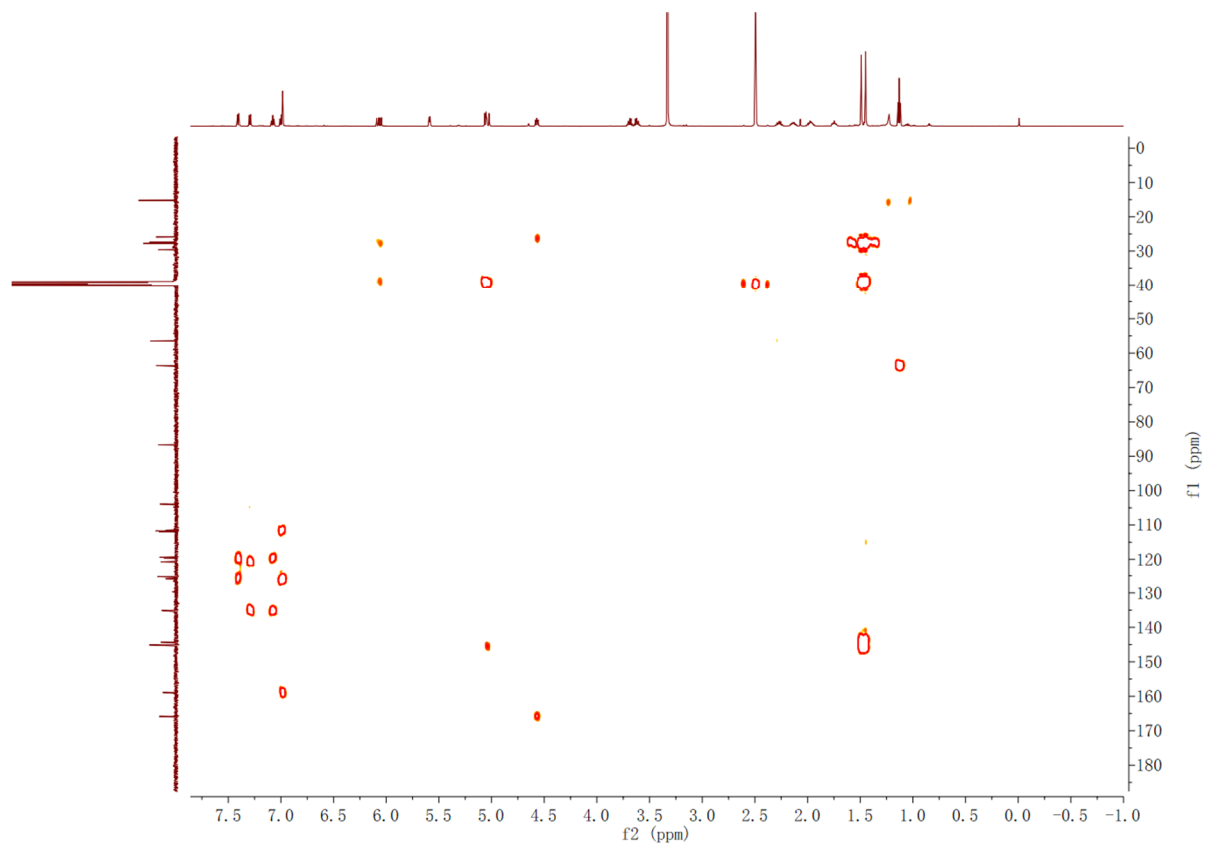

**Figure S4.** HMBC spectra (DMSO- $d_6$ ) of **1**.

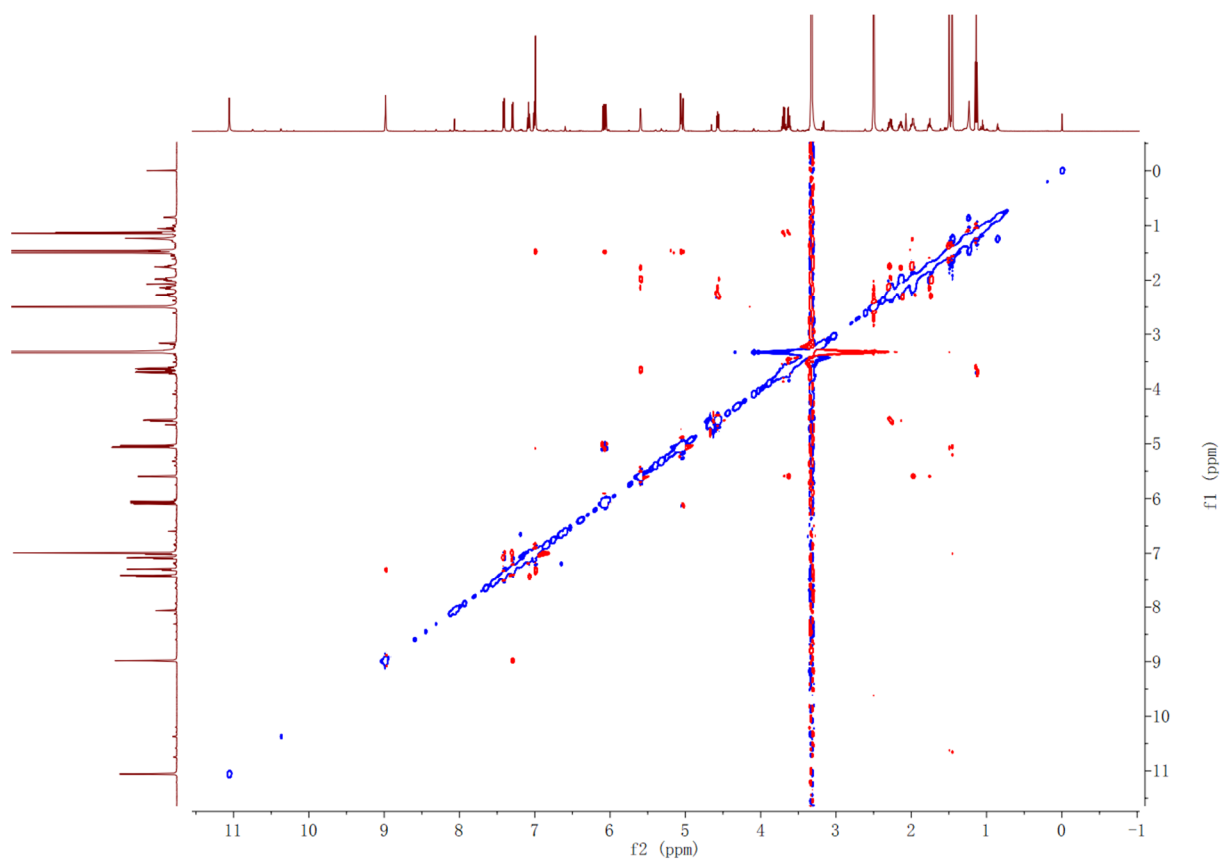

**Figure S5.** ROESY spectra (DMSO- $d_6$ ) of **1**.

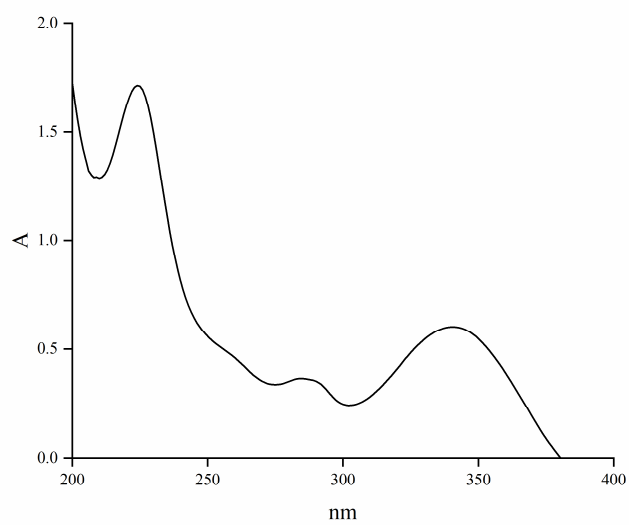

**Figure S6.** UV spectra (MeOH) of **1**.

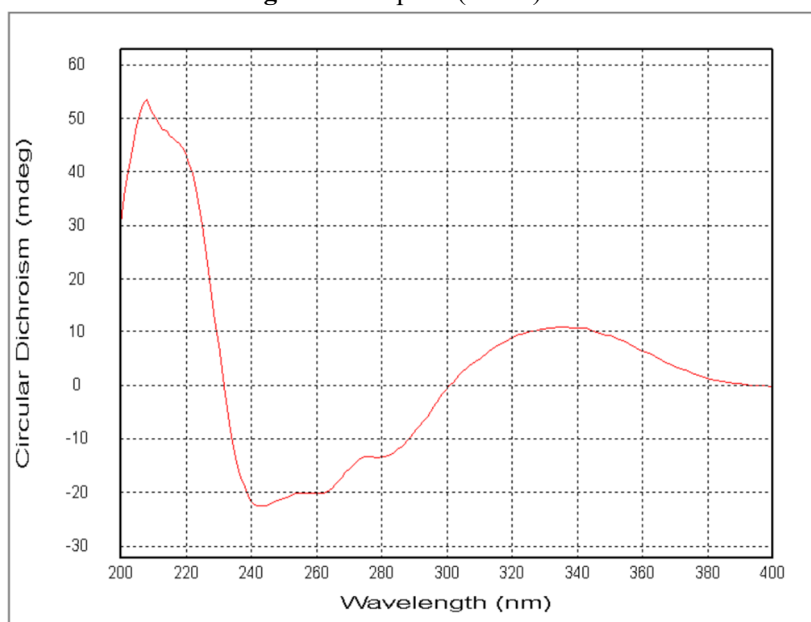

**Figure S7.** ECD spectra (MeOH) of **1**.

AC-6 #2971 RT: 5.65 AV: 1 NL: 2.38E7  
T: FTMS + p ESI Full ms [66.7000-1000.0000]

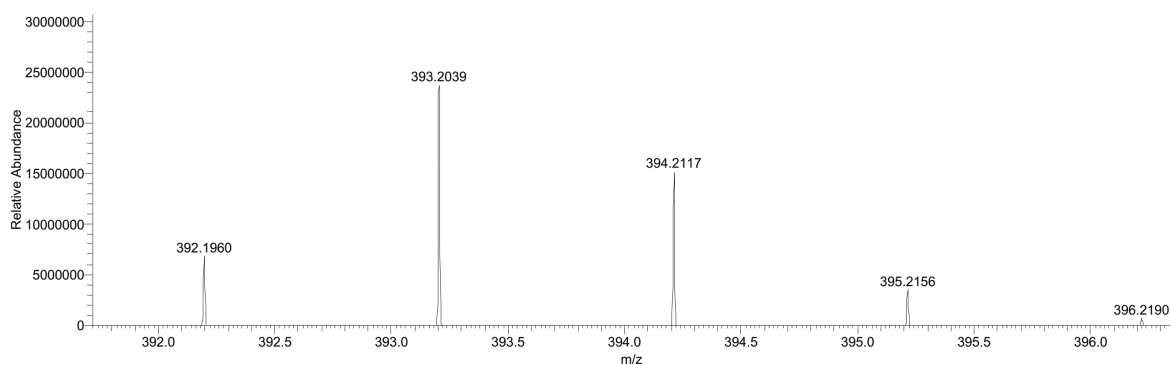

Figure S8. HRESIMS spectra of 1.

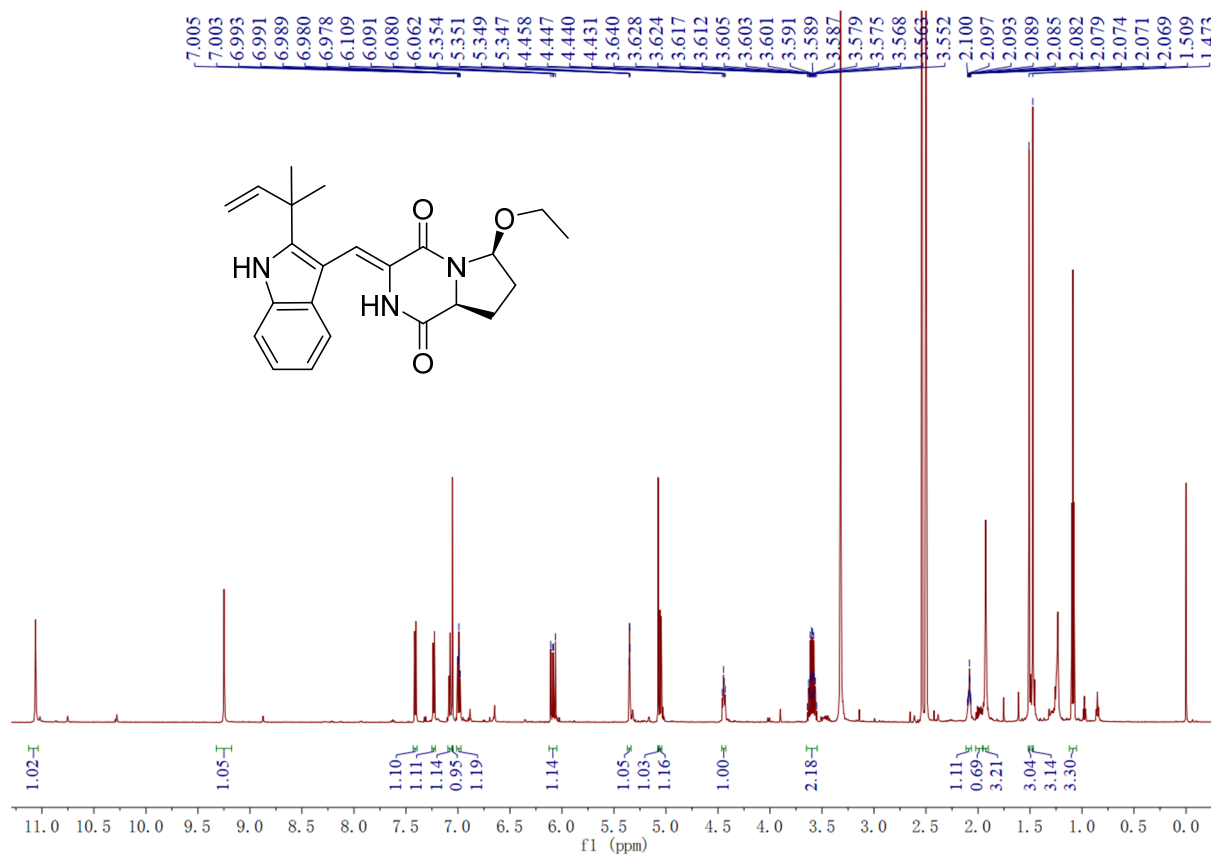

Figure S9. <sup>1</sup>H NMR spectra (600 MHz, DMSO-*d*<sub>6</sub>) of 2.

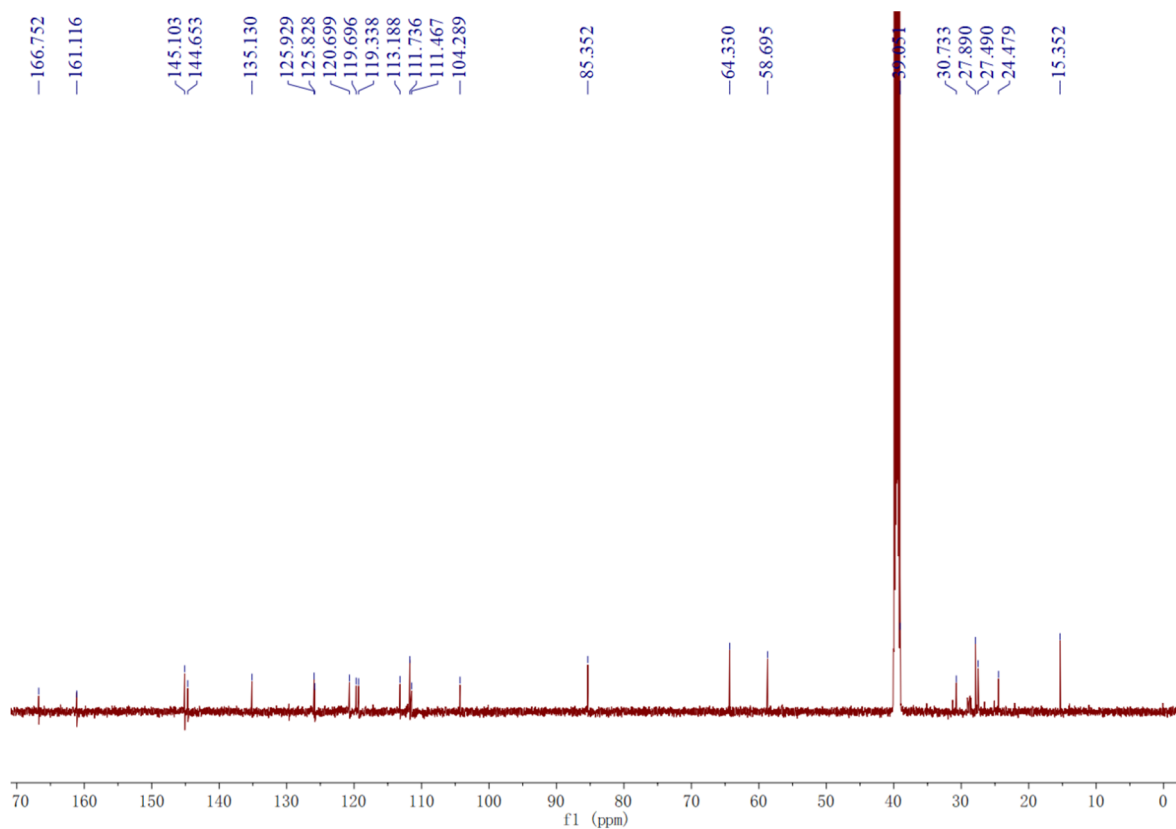

Figure S10.  $^{13}\text{C}$  NMR spectra (150 MHz,  $\text{DMSO-}d_6$ ) of **2**.

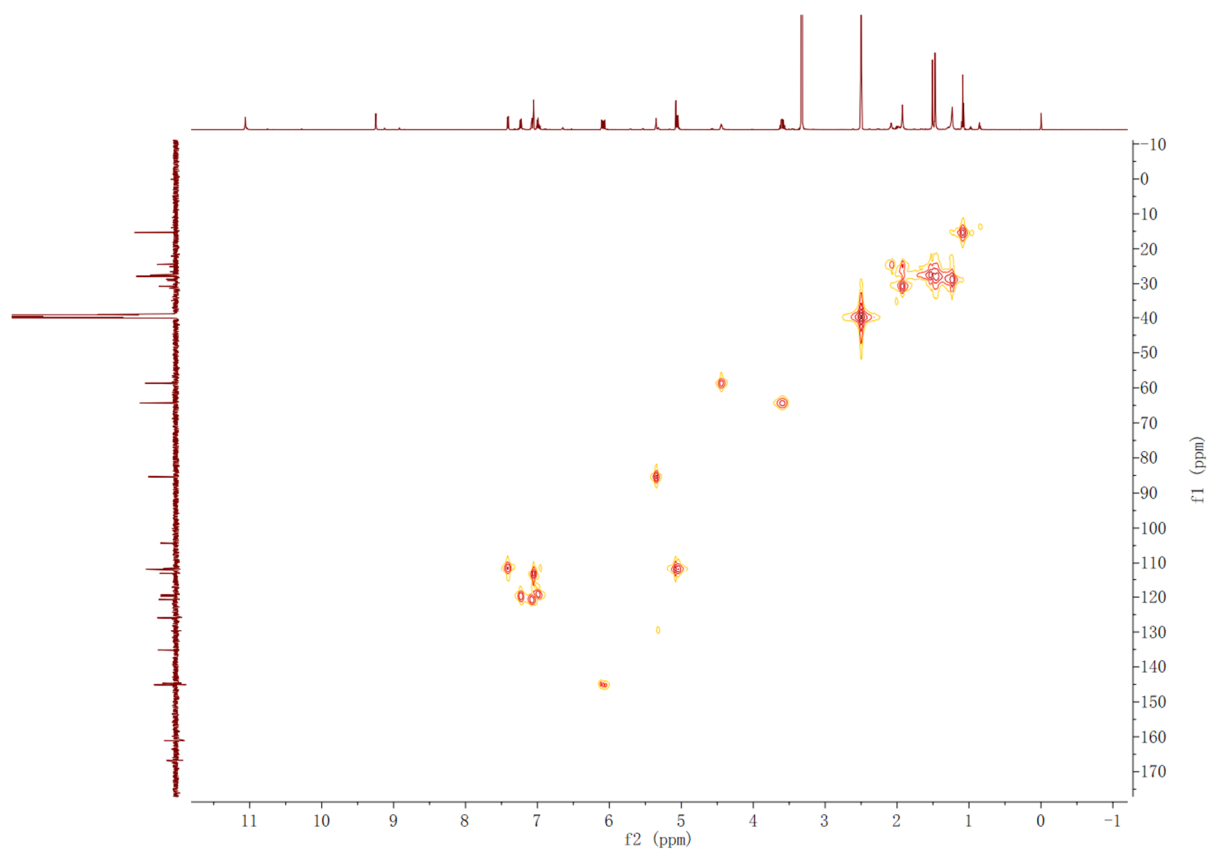

Figure S11. HMQC spectra ( $\text{DMSO-}d_6$ ) of **2**.

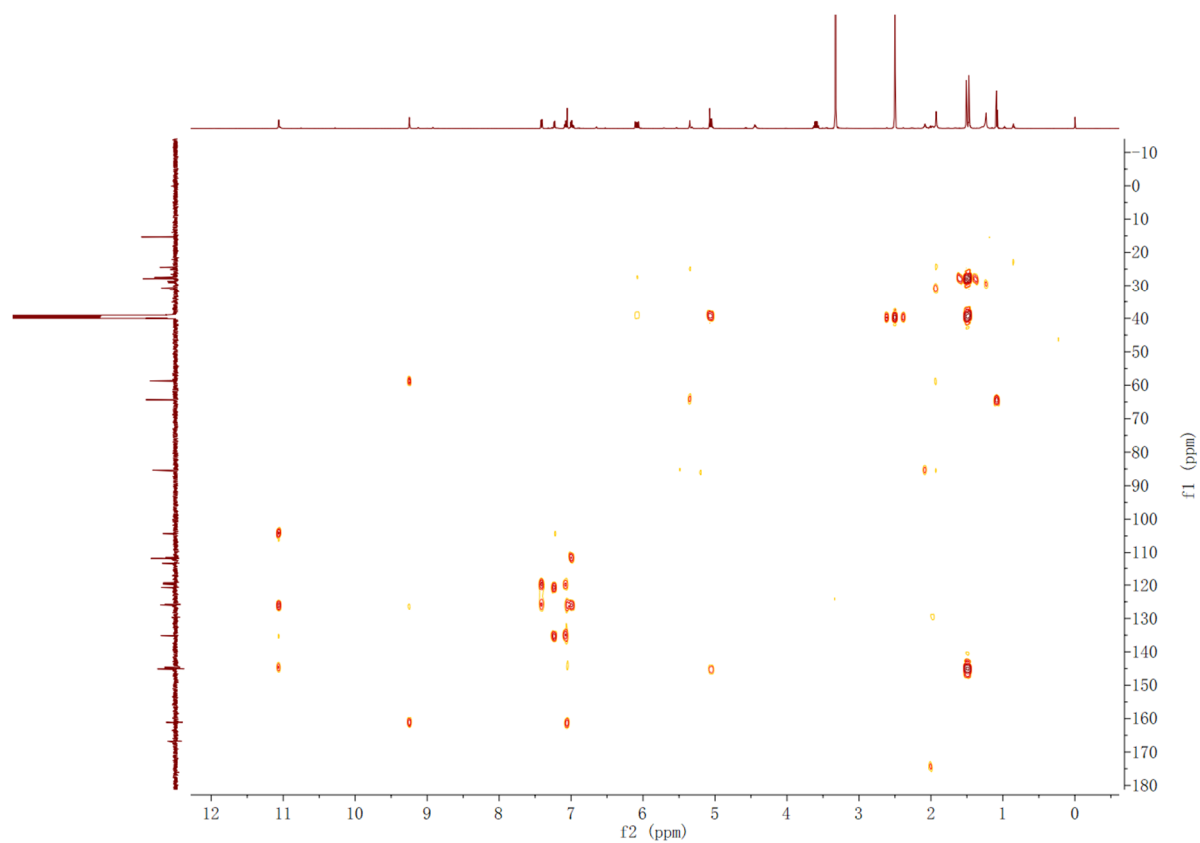

**Figure S12.** HMBC spectra (DMSO- $d_6$ ) of **2**.

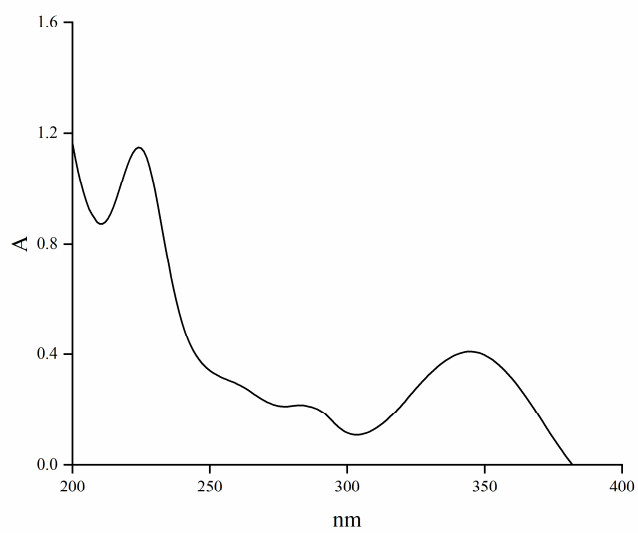

**Figure S13.** UV spectra (MeOH) of **2**.

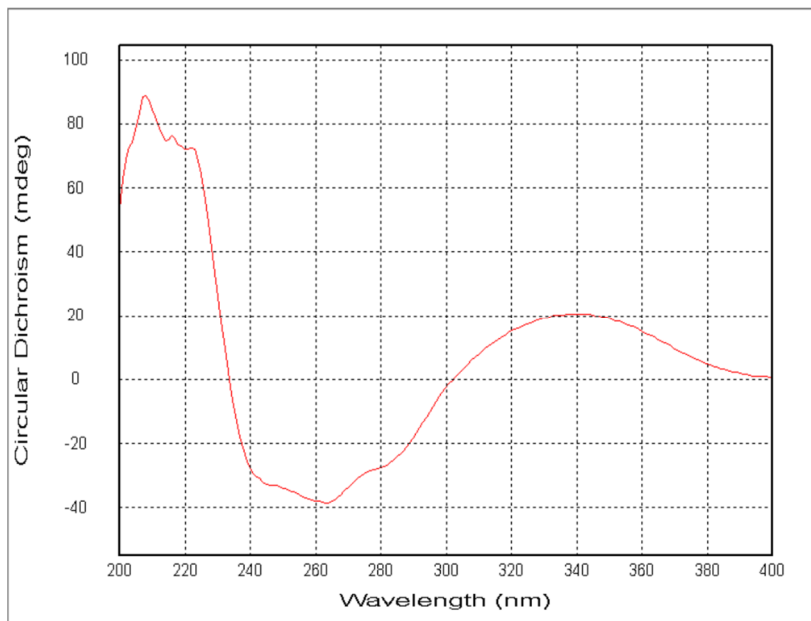

Figure S14. ECD spectra (MeOH) of **2**.

AC-13 #2949 RT: 5.53 AV: 1 NL: 7.71E7  
T: FTMS + p ESI Full ms [66.7000-1000.0000]

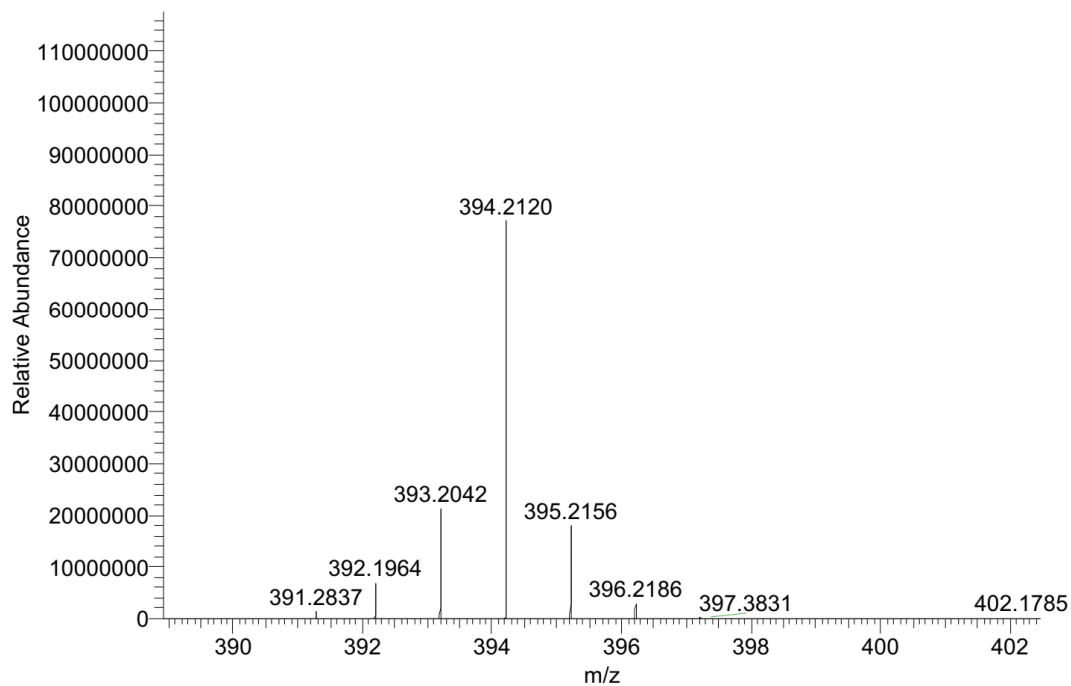

Figure S15. HRESIMS spectra of **2**.

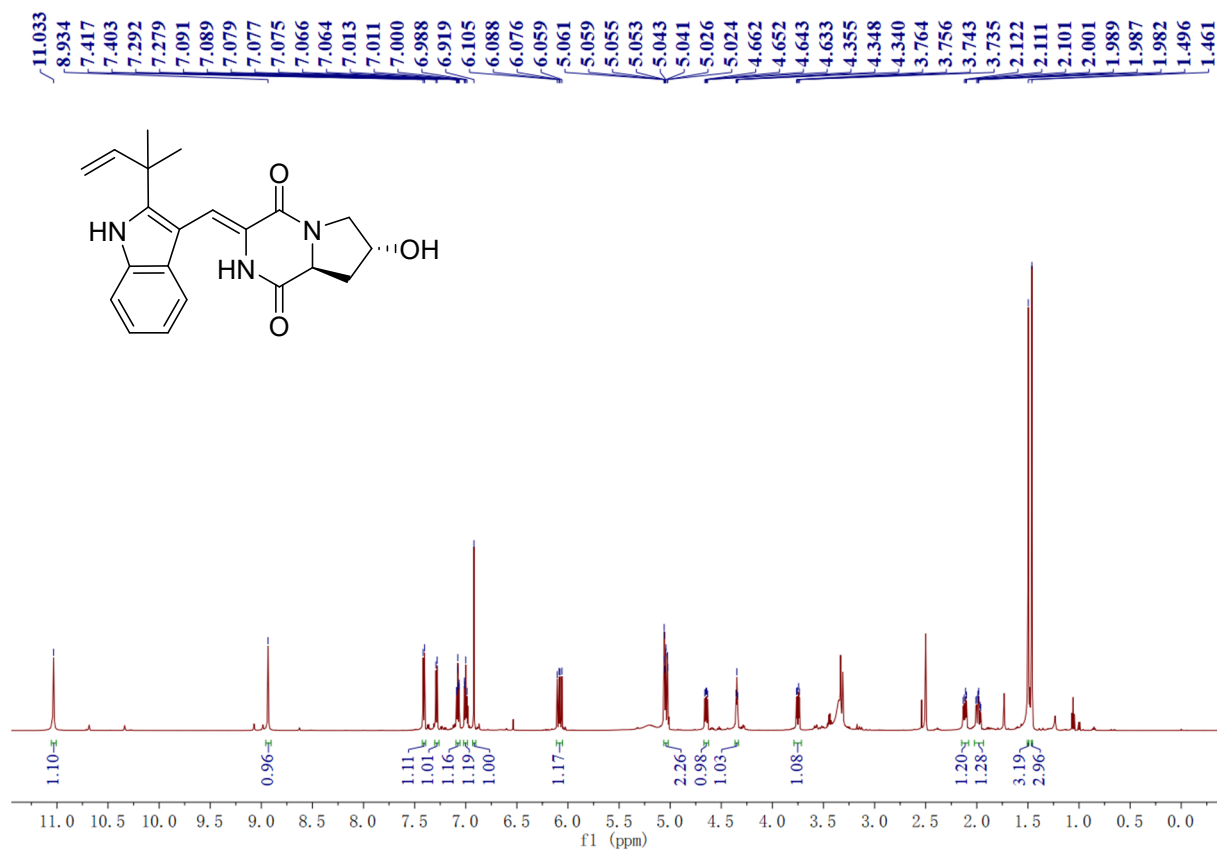

Figure S16. <sup>1</sup>H NMR spectra (600 MHz, DMSO-*d*<sub>6</sub>) of 3.

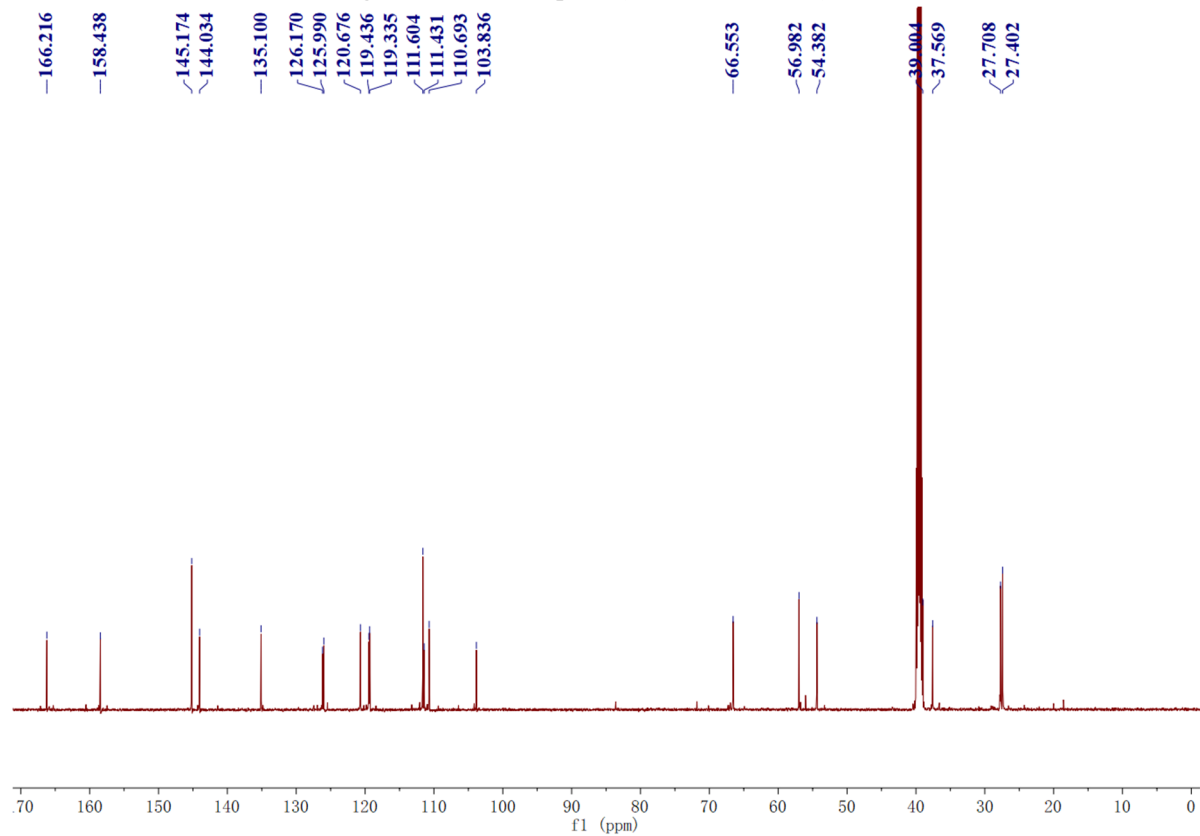

Figure S17. <sup>13</sup>C NMR spectra (150 MHz, DMSO-*d*<sub>6</sub>) of 3.



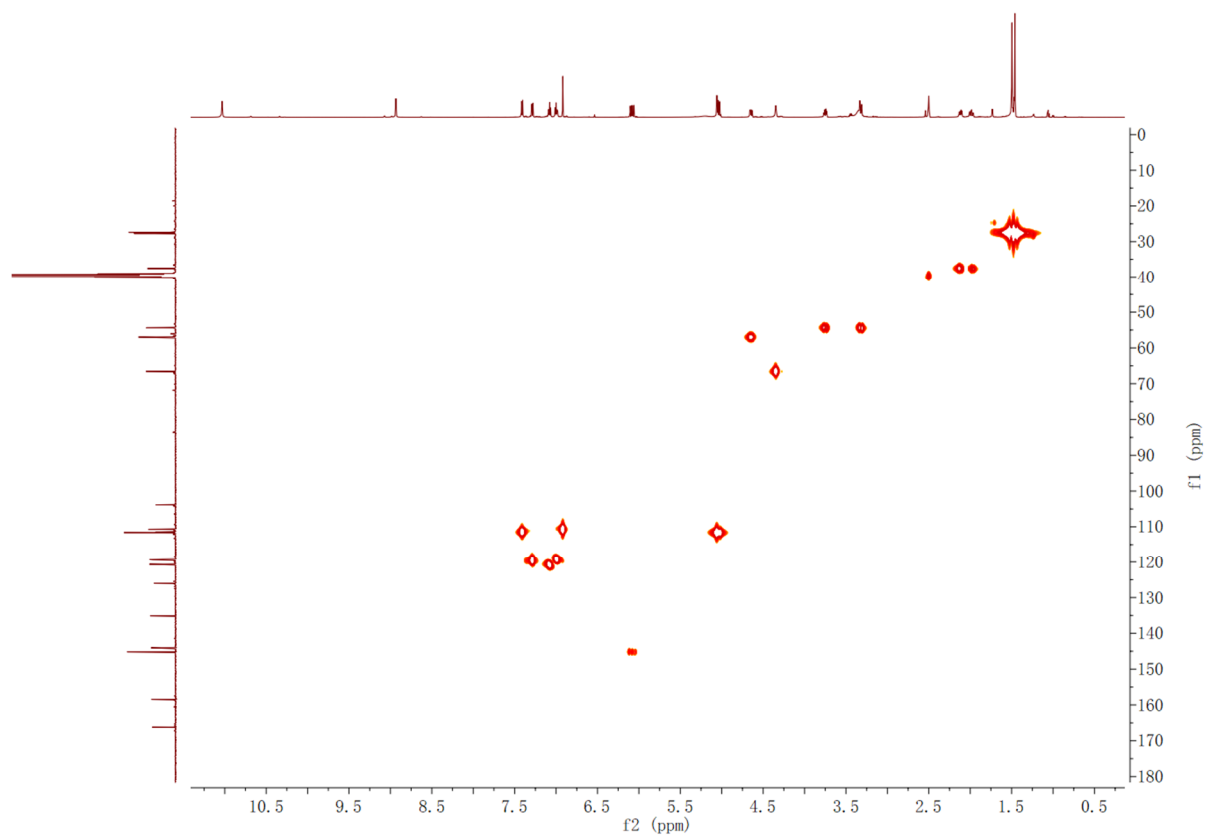

**Figure S18.** HMQC spectra (DMSO- $d_6$ ) of **3**.

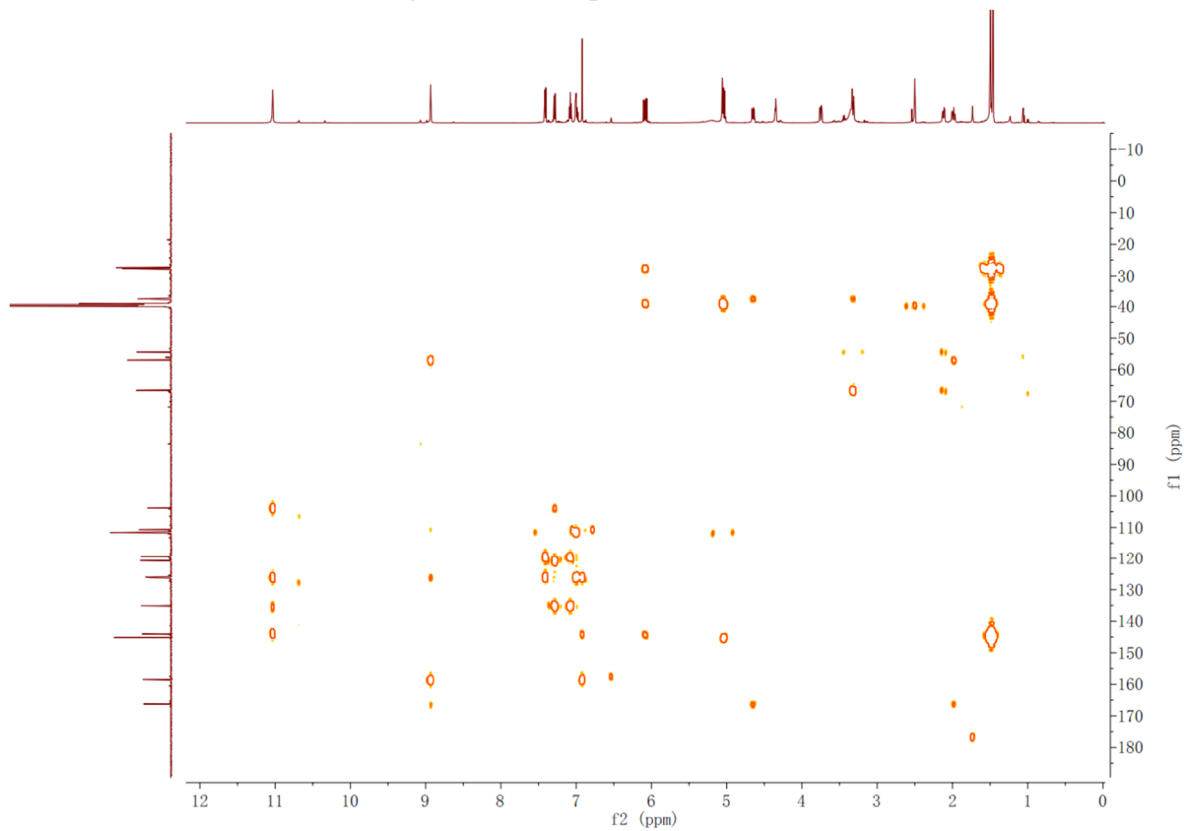

**Figure S19.** HMBC spectra (DMSO- $d_6$ ) of **3**.

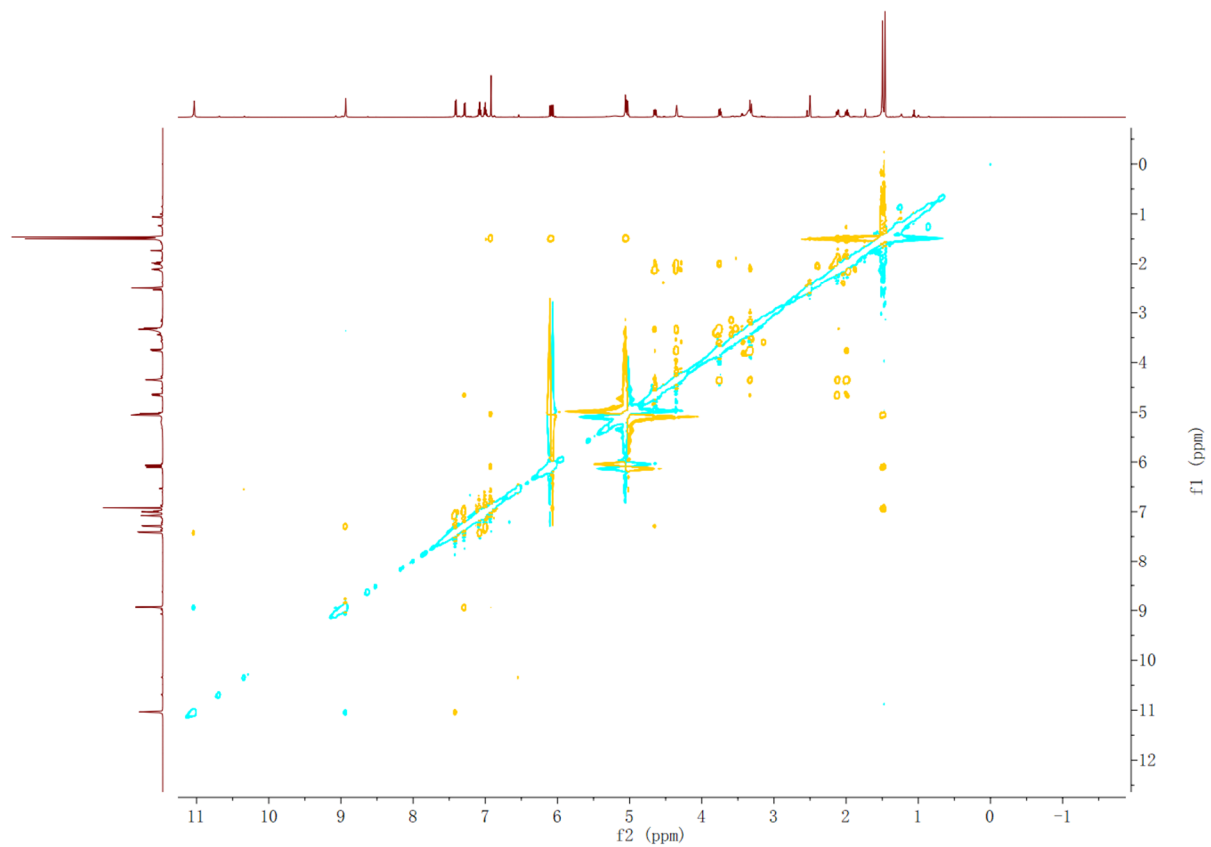

**Figure S20.** ROESY spectra (DMSO- $d_6$ ) of **3**.

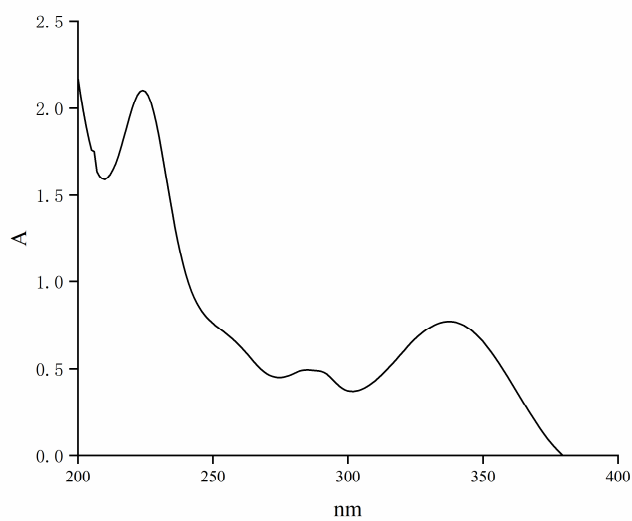

**Figure S21.** UV spectra (MeOH) of **3**.

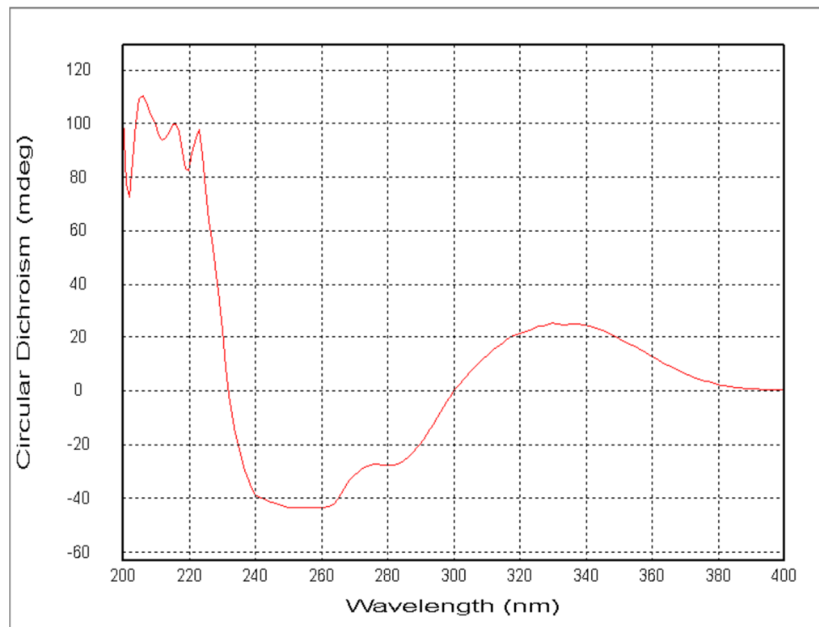

**Figure S22.** ECD spectra (MeOH) of **3**.

AC-22 #2542 RT: 4.75 AV: 1 NL: 4.49E8  
T: FTMS + p ESI Full ms [66.7000-1000.0000]

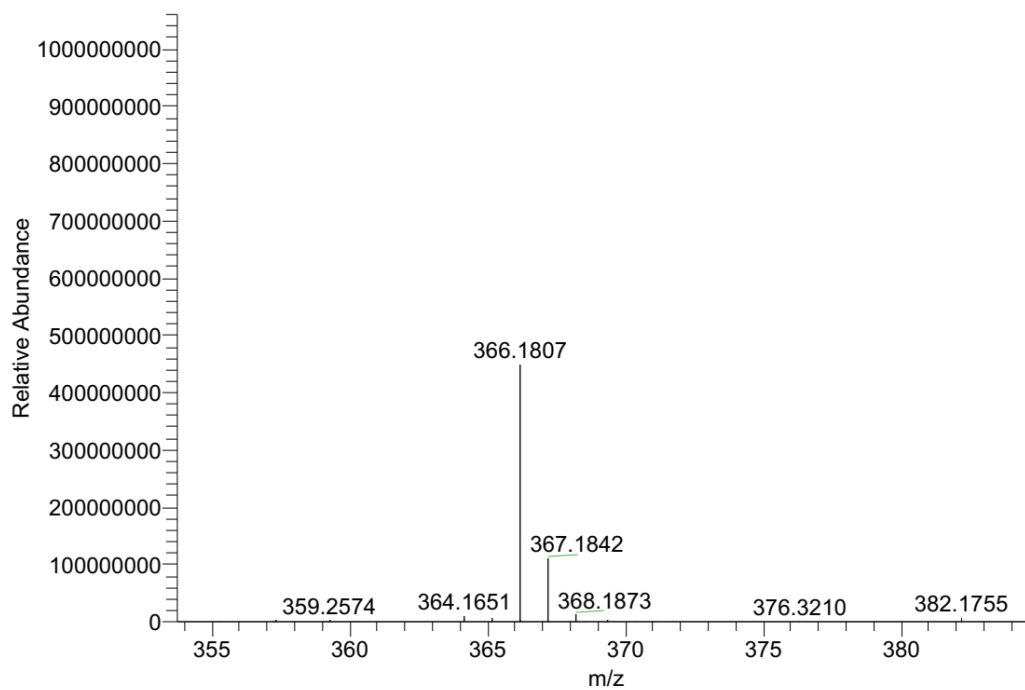

**Figure S23.** HRESIMS spectra of **3**.

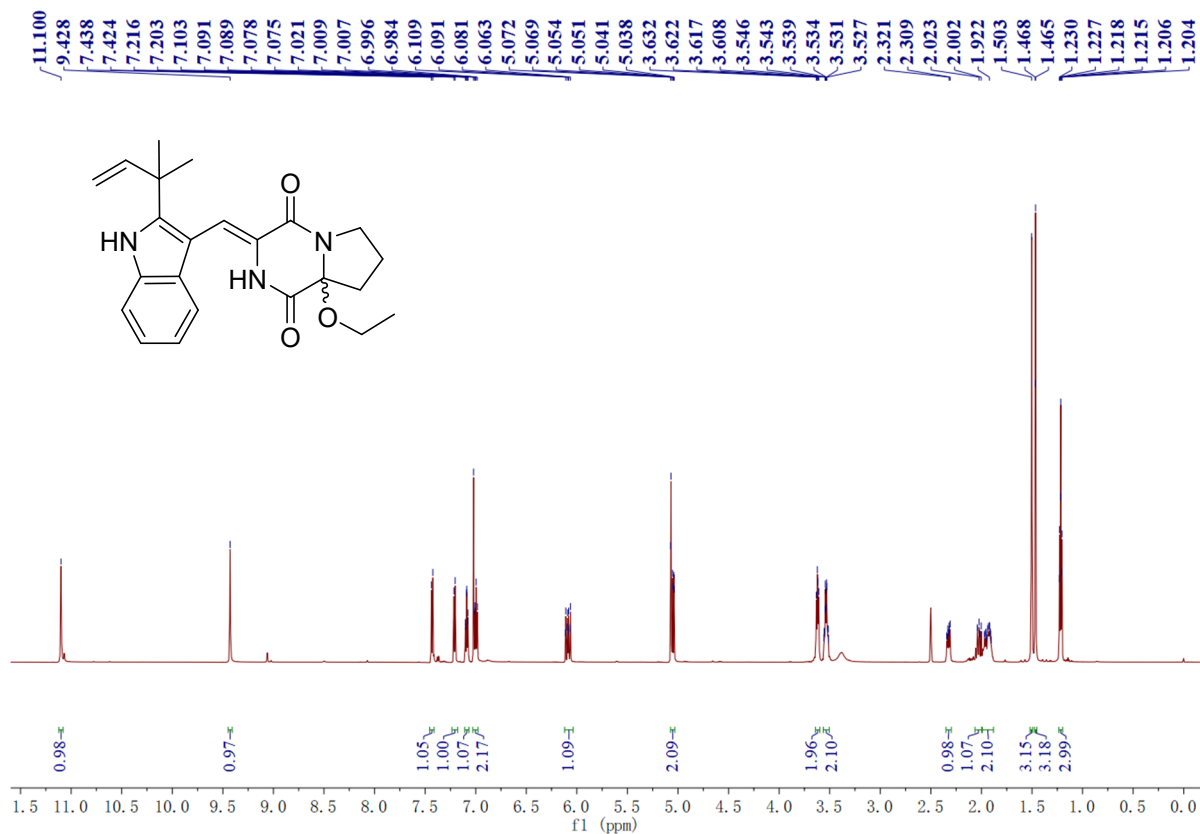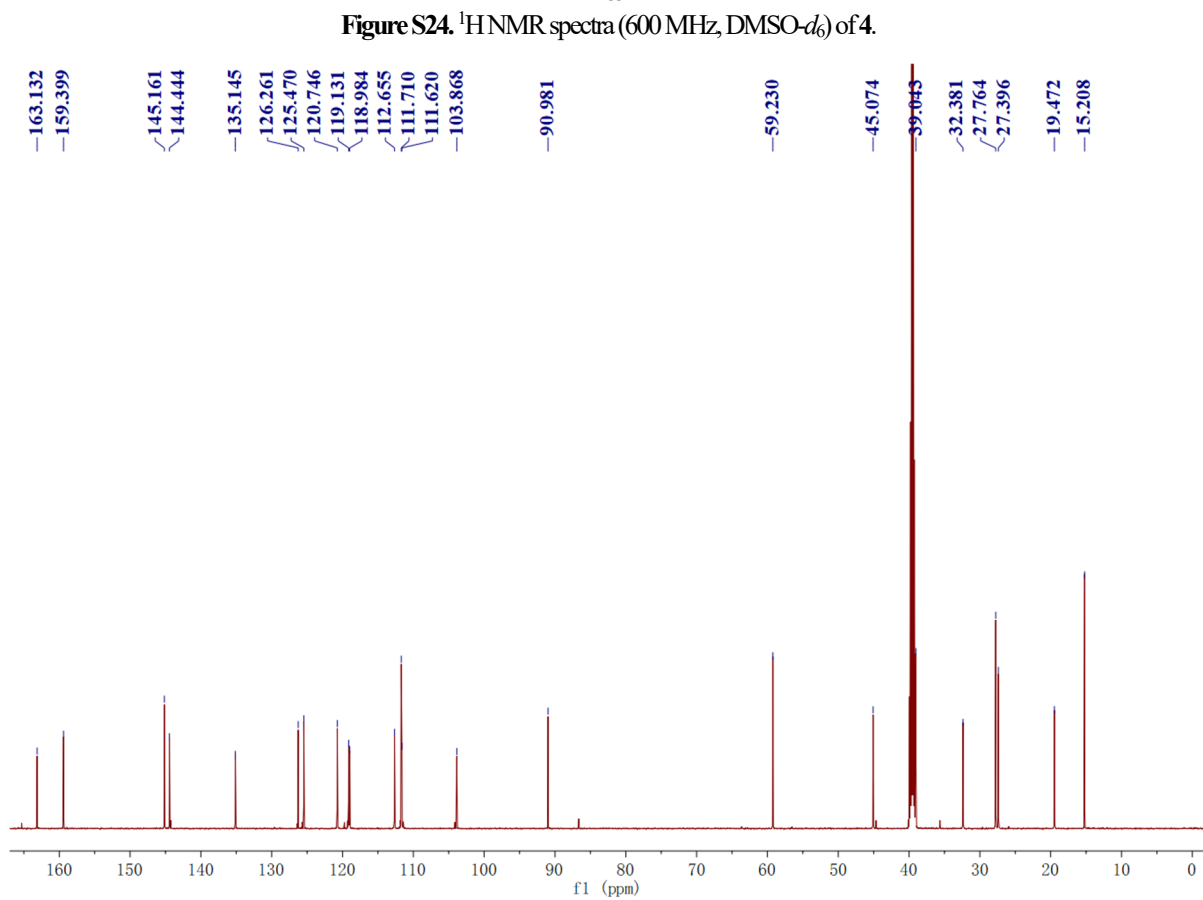

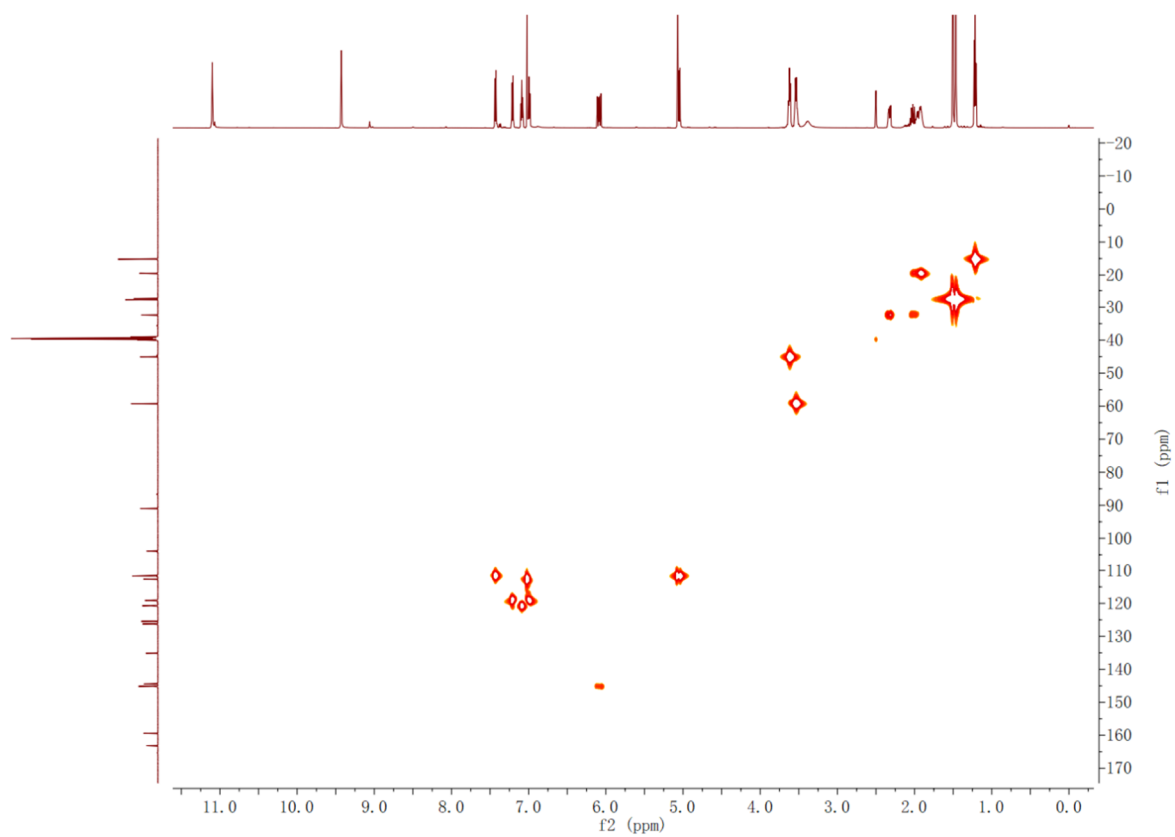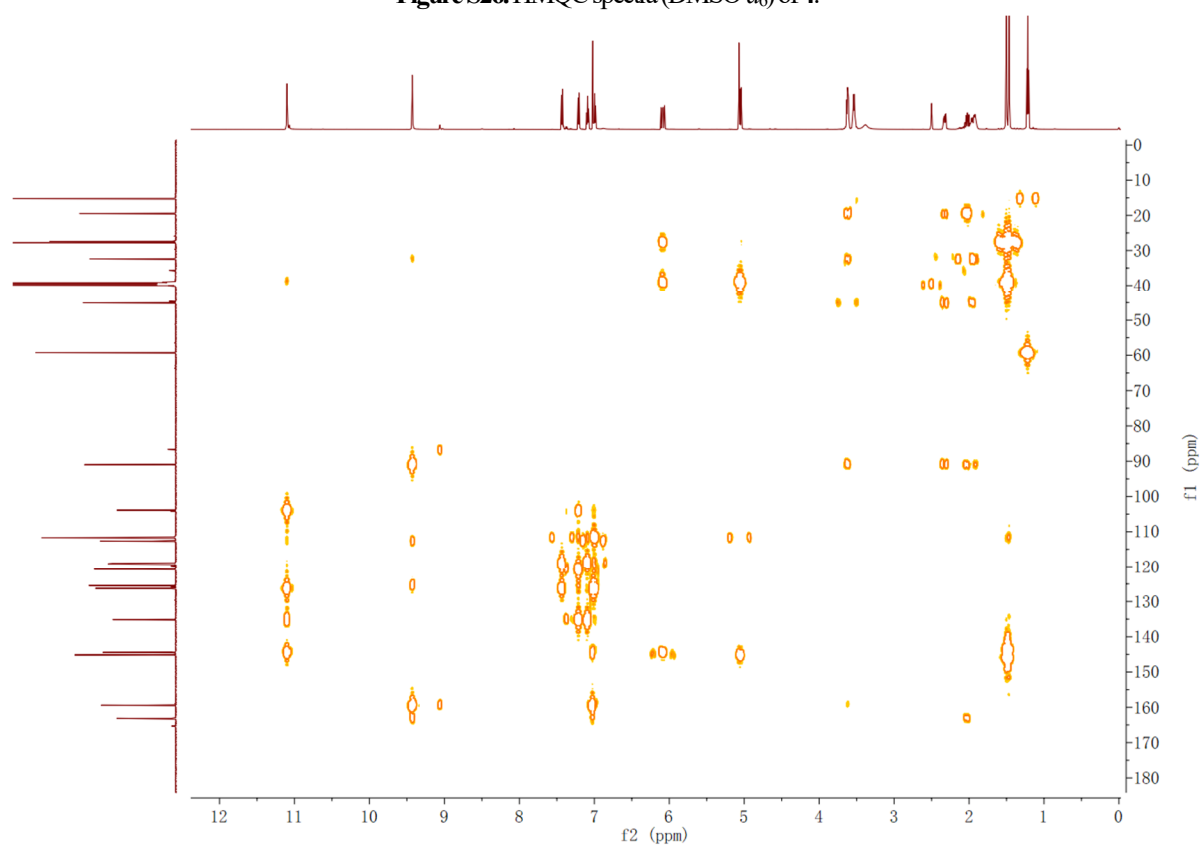

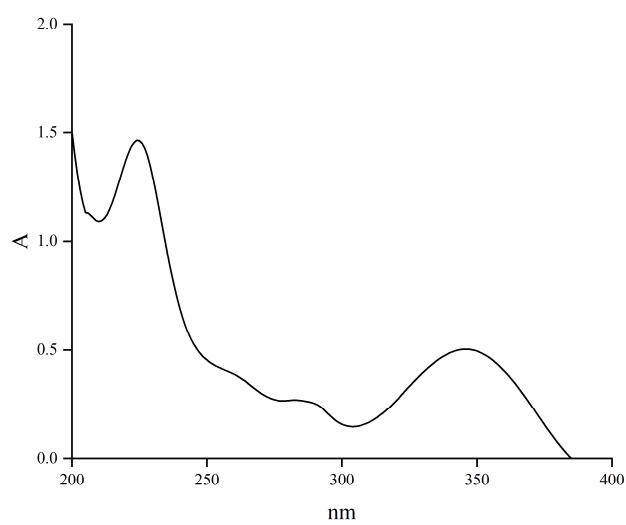

**Figure S28.** UV spectra (MeOH) of **4**.

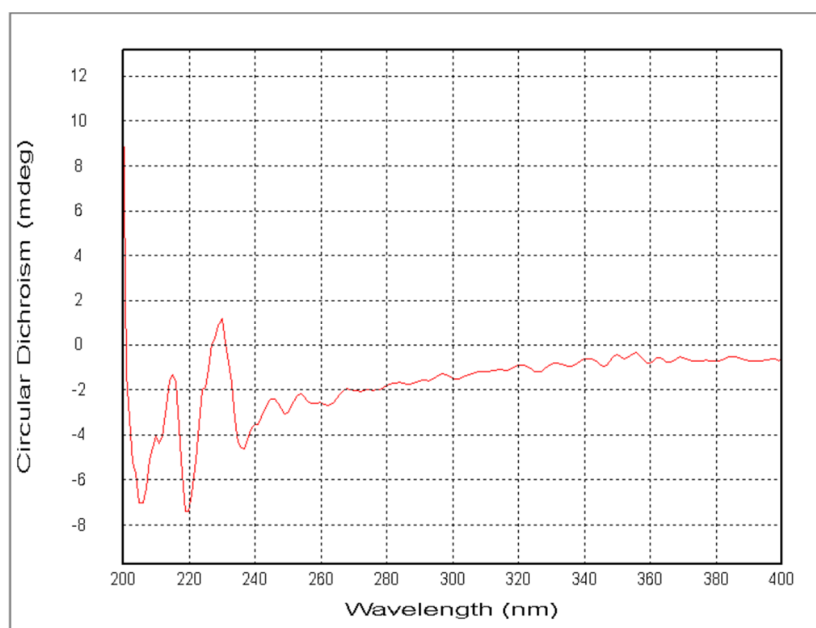

**Figure S29.** ECD spectra (MeOH) of **4**.

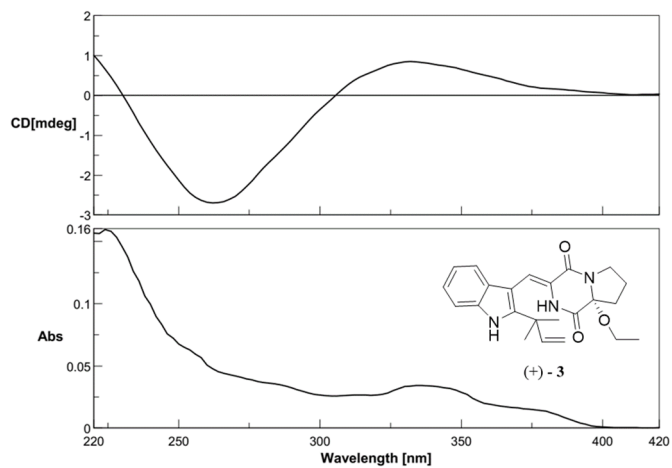

**Figure S30.** ECD spectra (MeOH) of (+)-4.

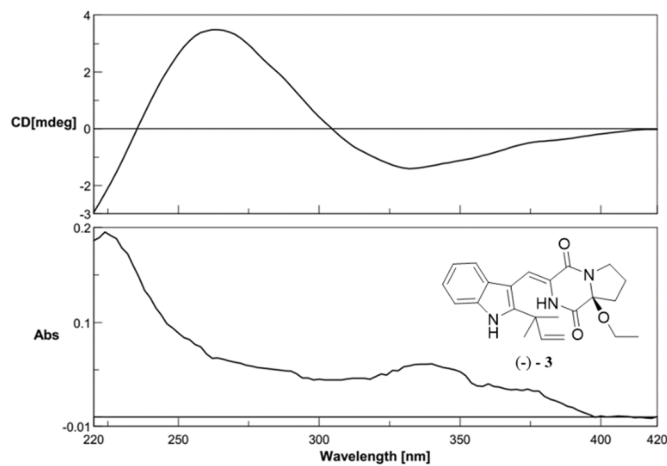

**Figure S31.** ECD spectra (MeOH) of (-)-4.

AC-9 #1871 RT: 3.53 AV: 1 NL: 8.80E7  
T: FTMS + p ESI Full ms [66.7000-1000.0000]

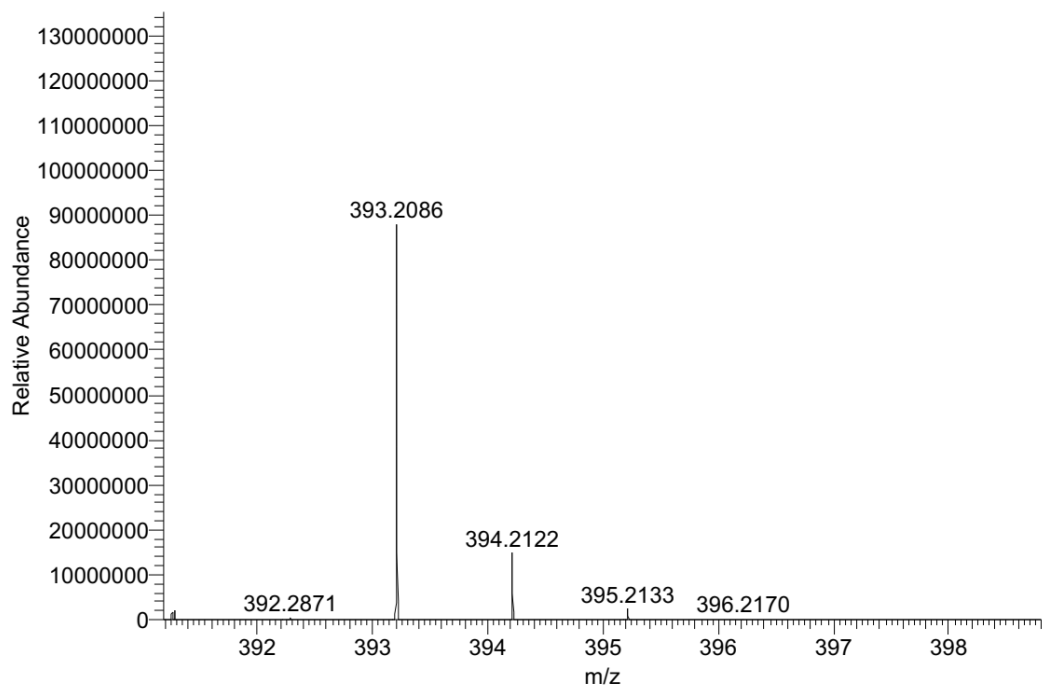

Figure S32. HRESIMS spectra of 4.

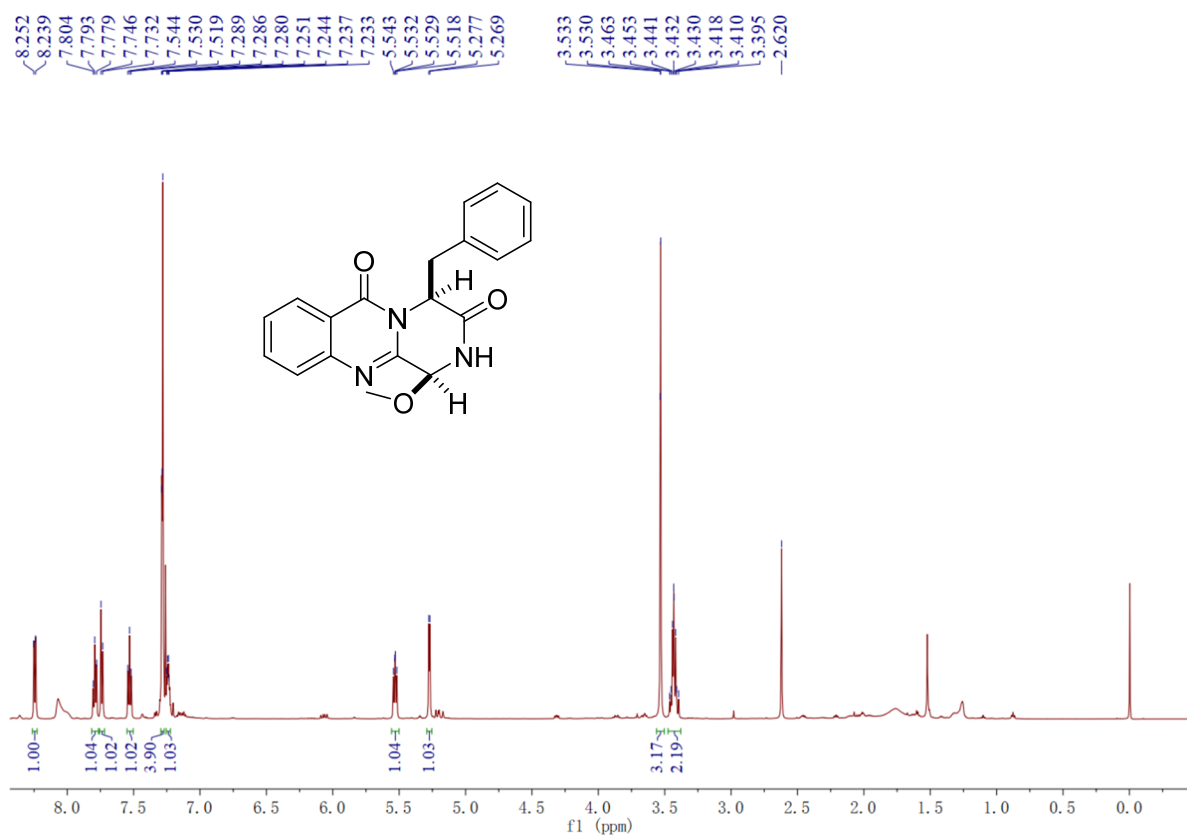

Figure S33. <sup>1</sup>H NMR spectra (600 MHz, CDCl<sub>3</sub>) of 5.



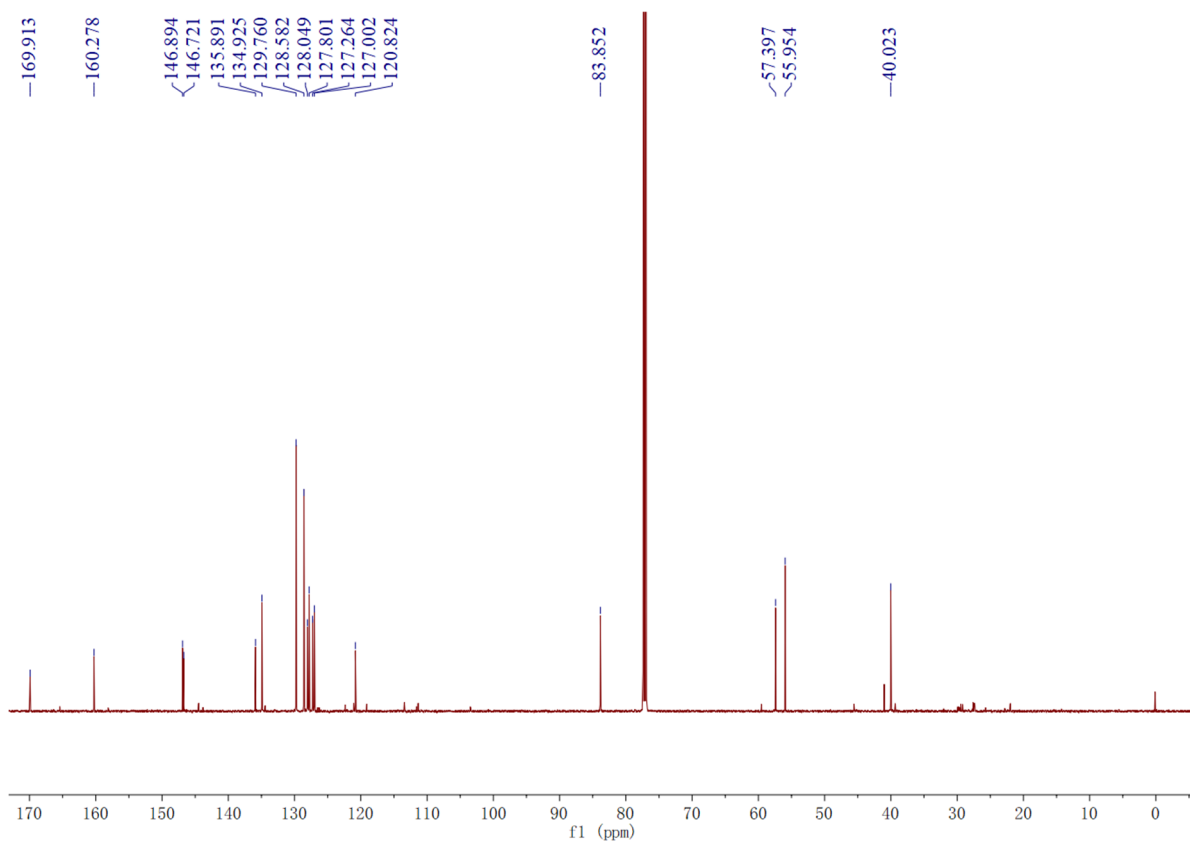

Figure S34.  $^{13}\text{C}$  NMR spectra (150 MHz,  $\text{CDCl}_3$ ) of **5**.

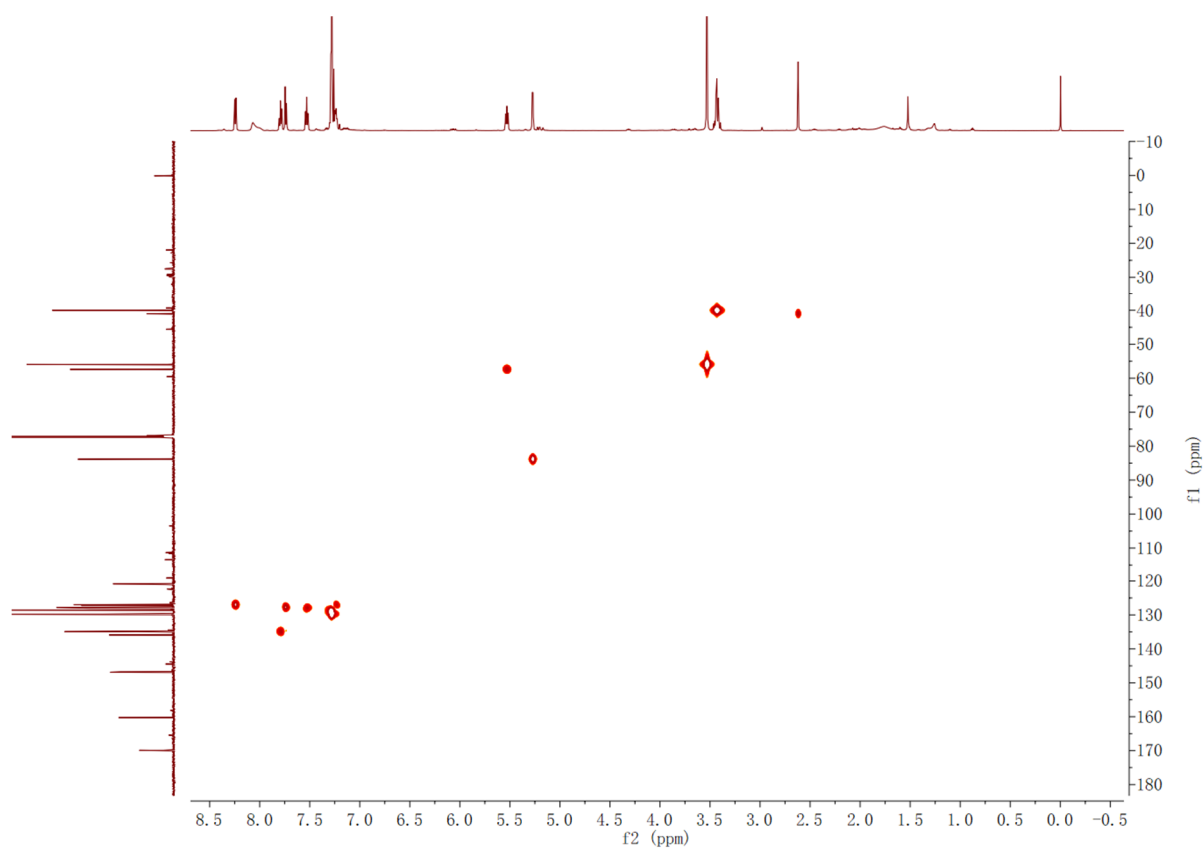

Figure S35. HMQC spectra ( $\text{CDCl}_3$ ) of **5**.

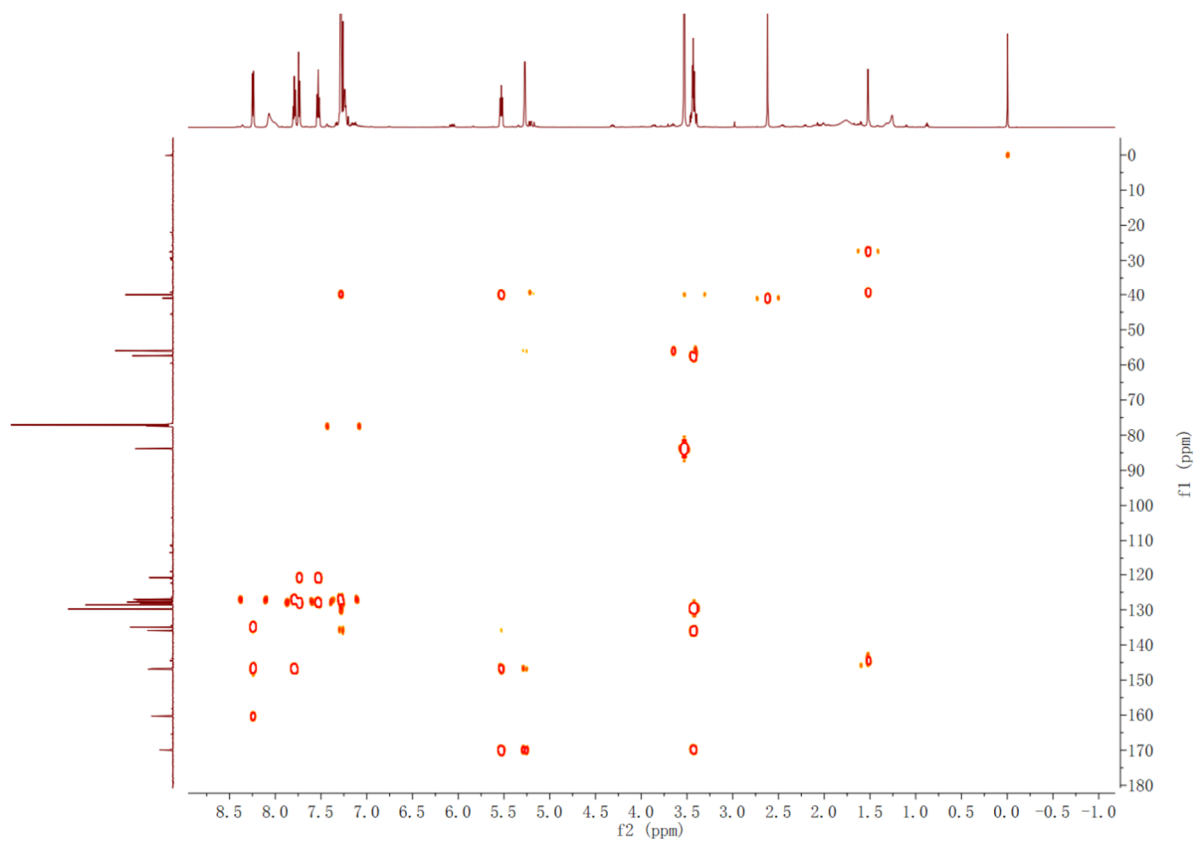

**Figure S36.** HMBC spectra ( $\text{CDCl}_3$ ) of **5**.

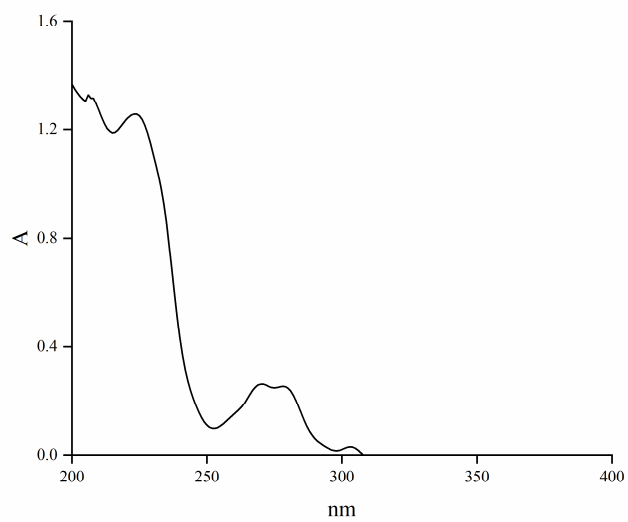

**Figure S37.** UV spectra (MeOH) of **5**.

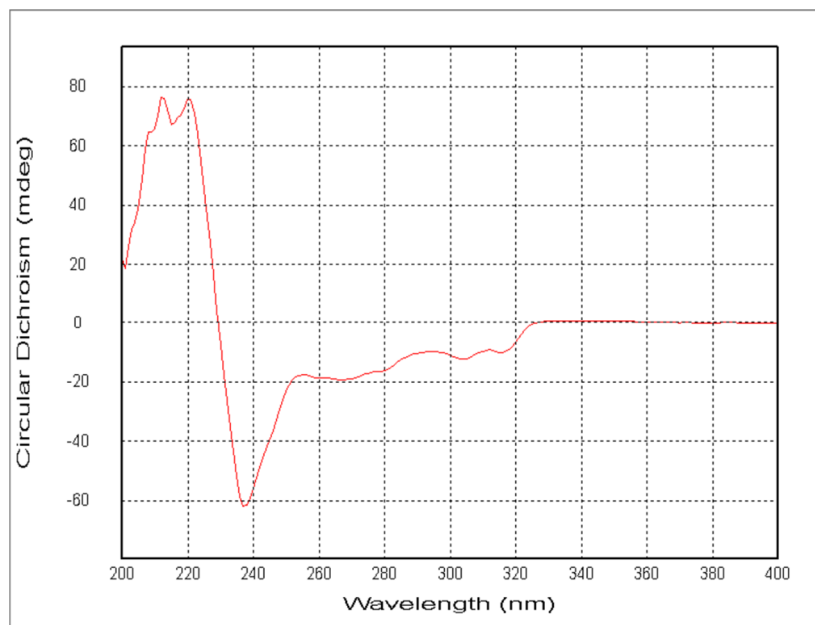

**Figure S38.** ECD spectra (MeOH) of **5**.

AC-20 #3015 RT: 5.67 AV: 1 NL: 3.00E9  
 T: FTMS + p ESI Full ms [66.7000-1000.0000]

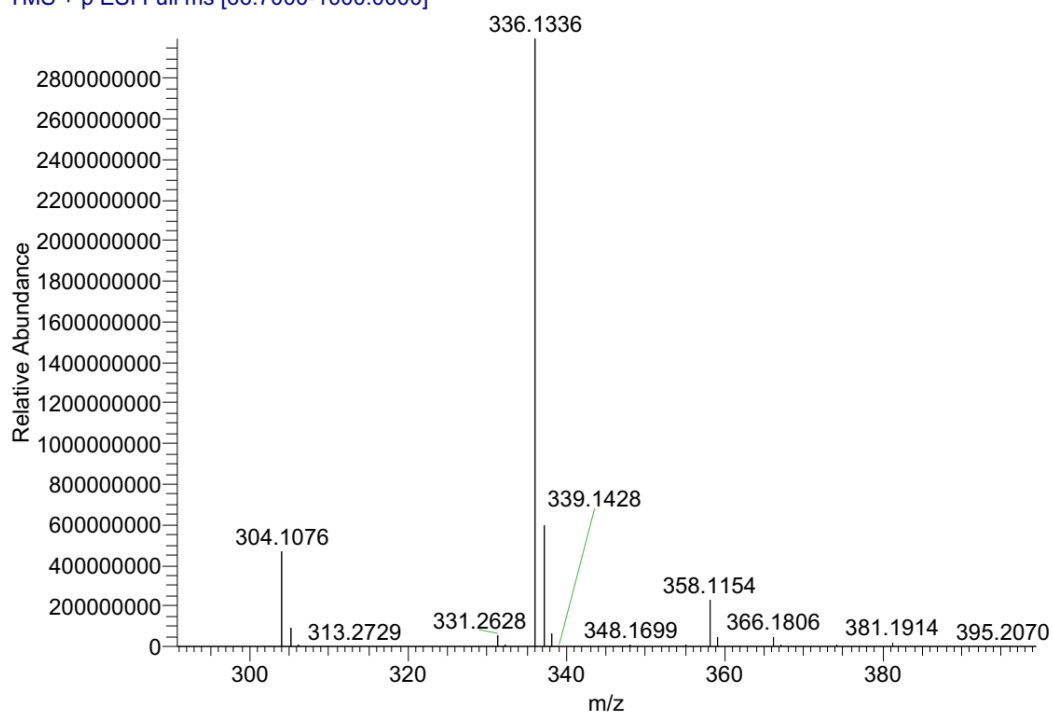

**Figure S39.** HRESIMS spectra of **5**.

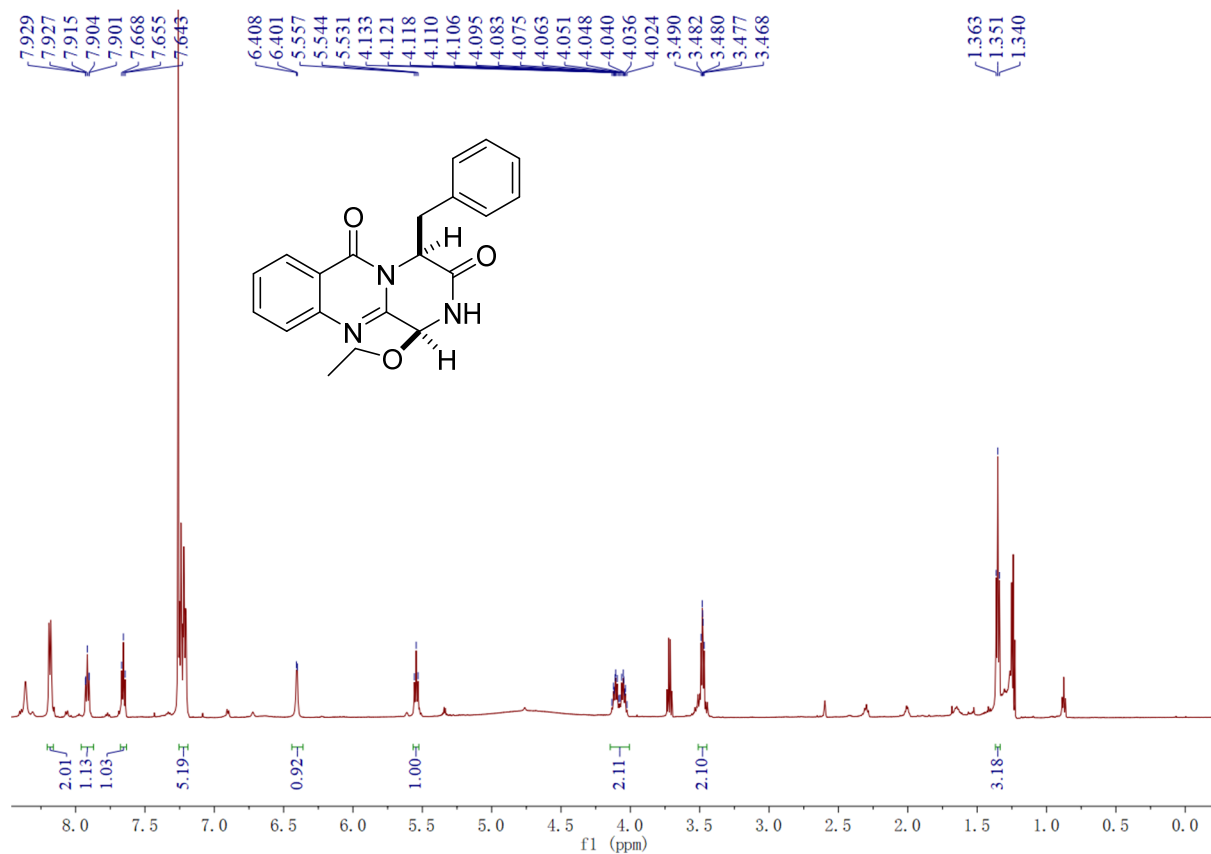

Figure S40.  $^1\text{H}$  NMR spectra (600 MHz,  $\text{CDCl}_3$ ) of 6.

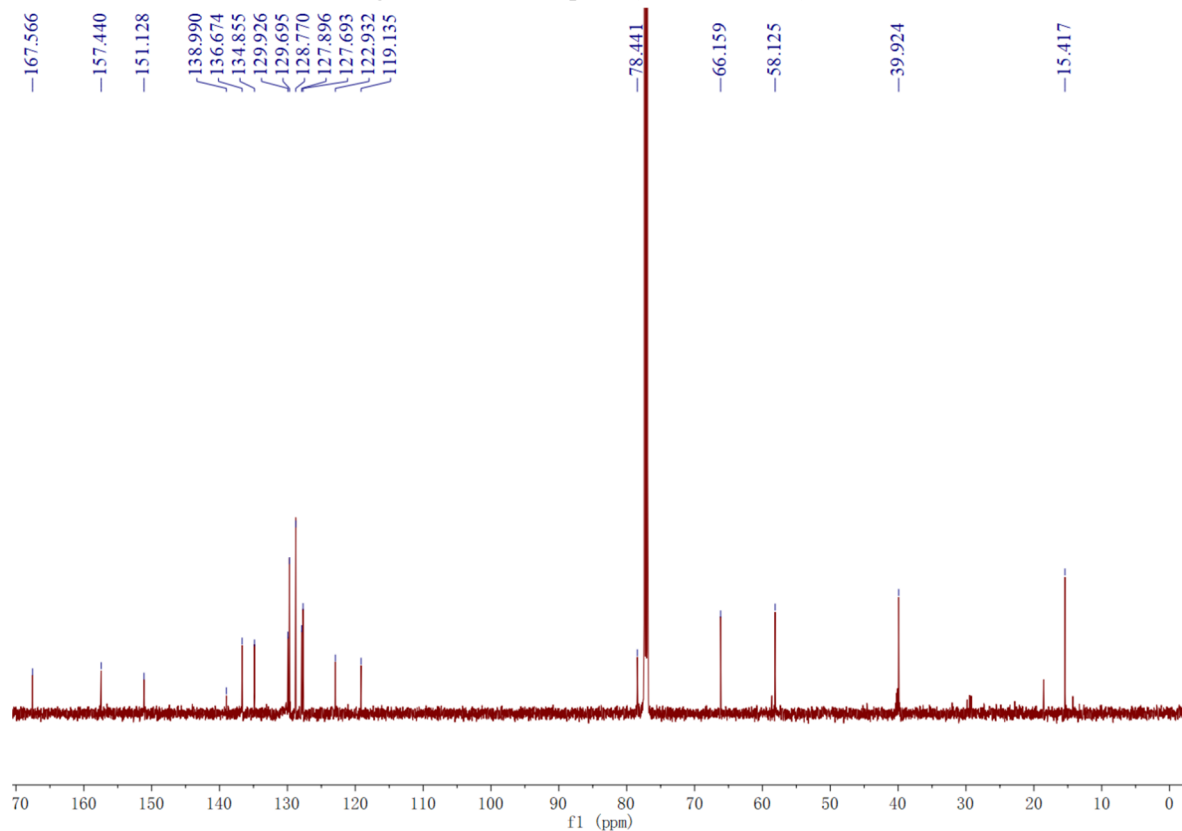

Figure S41.  $^{13}\text{C}$  NMR spectra (150 MHz,  $\text{CDCl}_3$ ) of 6.

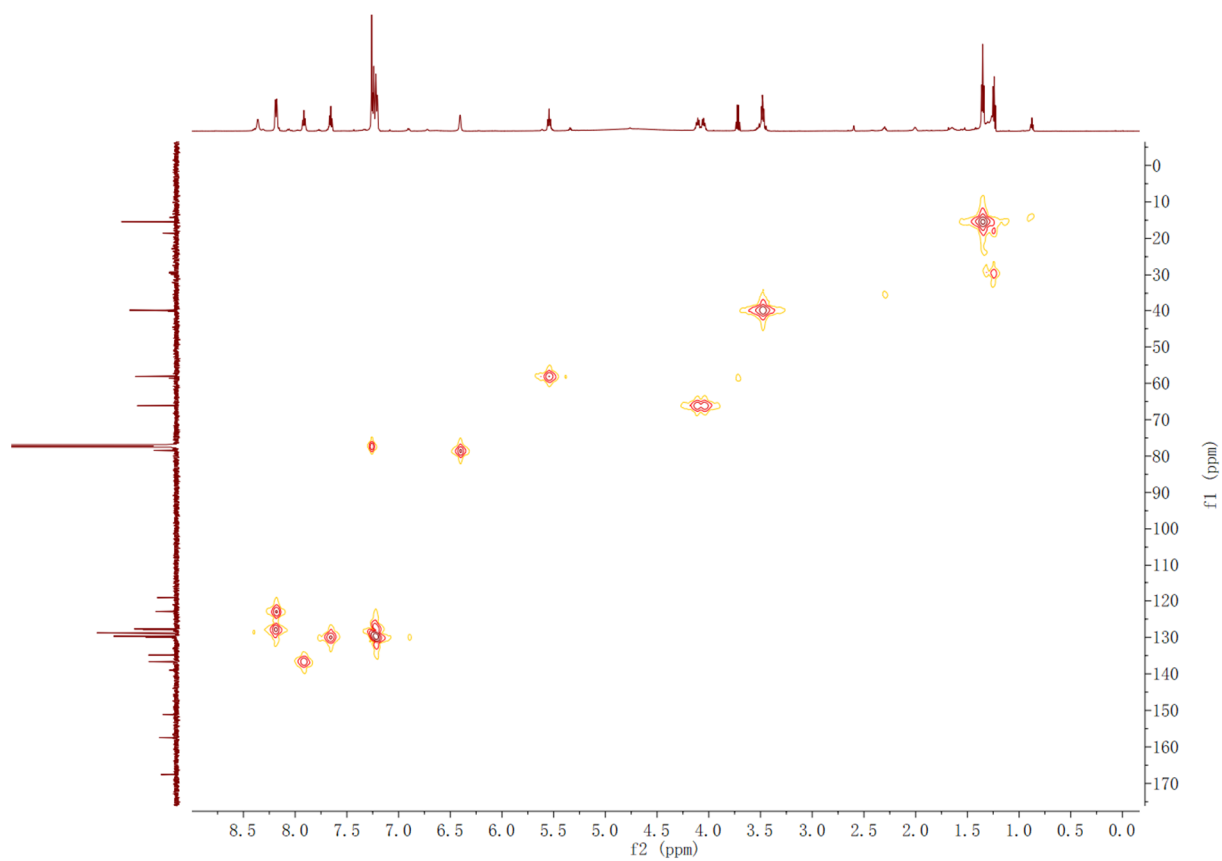

Figure S42. HMBC spectra ( $\text{CDCl}_3$ ) of **6**.

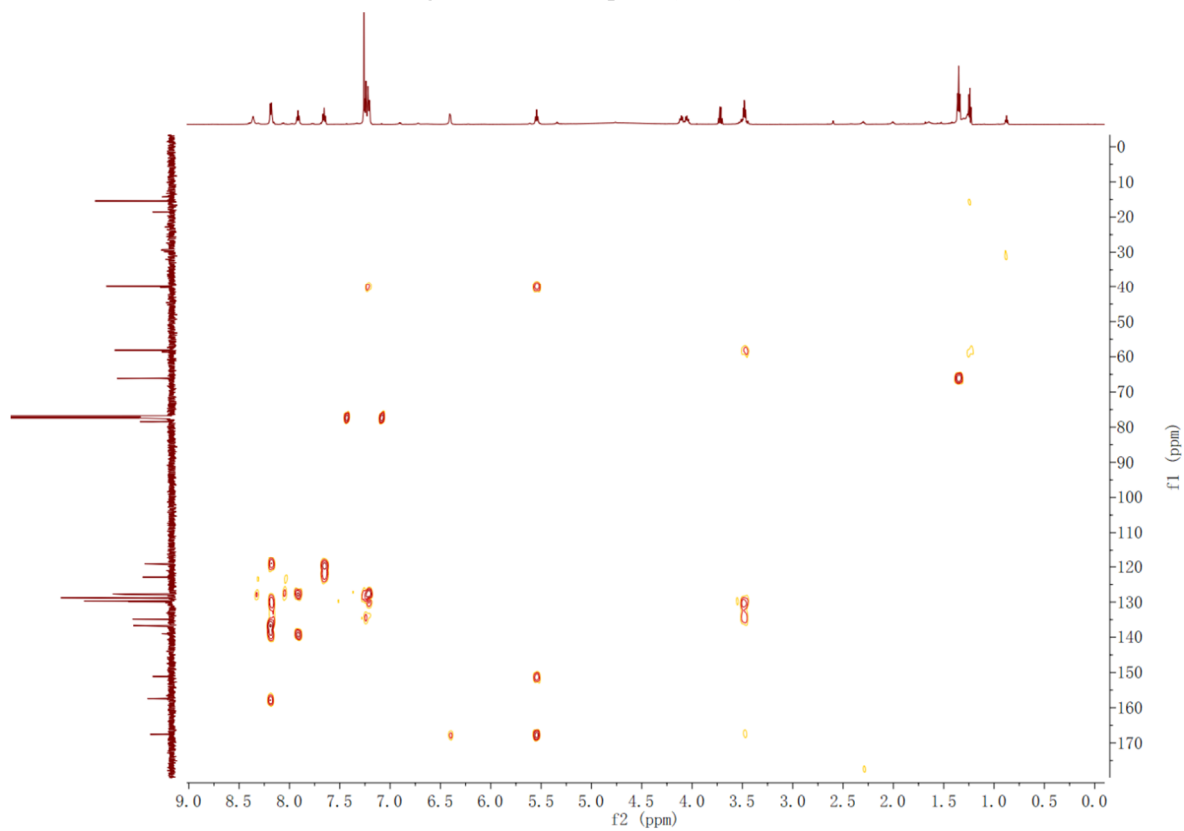

Figure S43. HMBC spectra ( $\text{CDCl}_3$ ) of **6**.

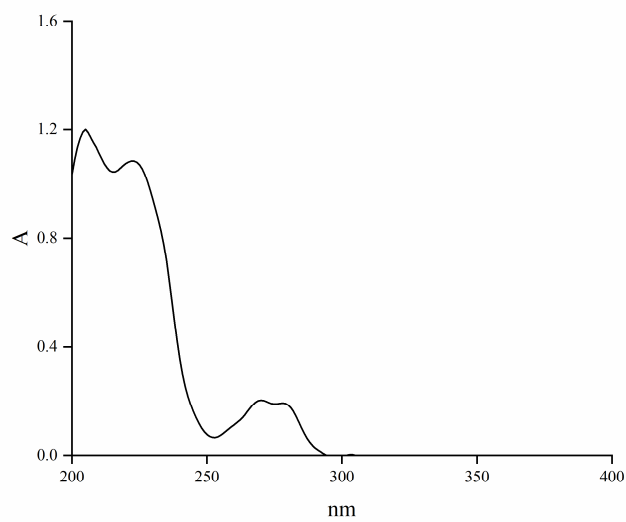

**Figure S44.** UV spectra (MeOH) of **6**.

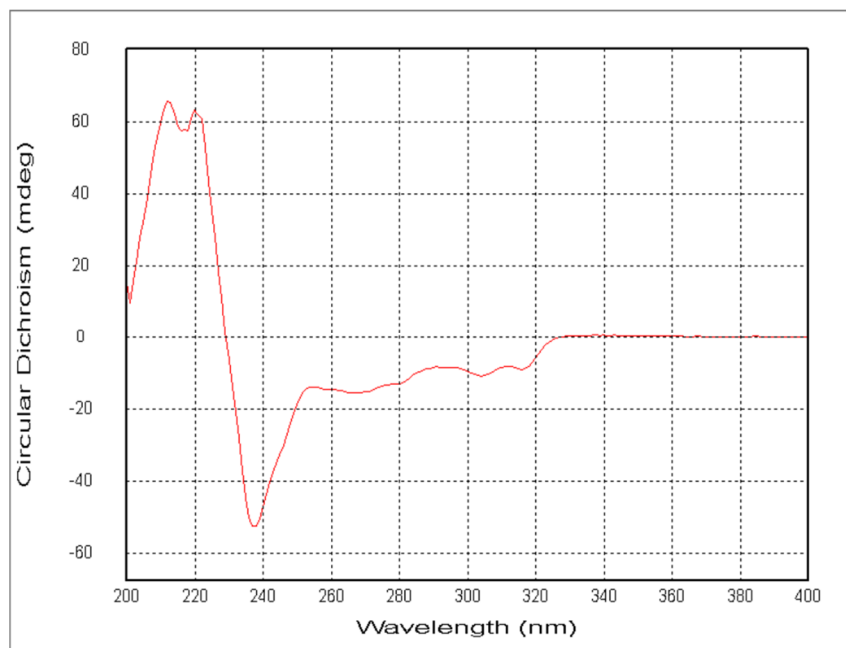

**Figure S45.** ECD spectra (MeOH) of **6**.

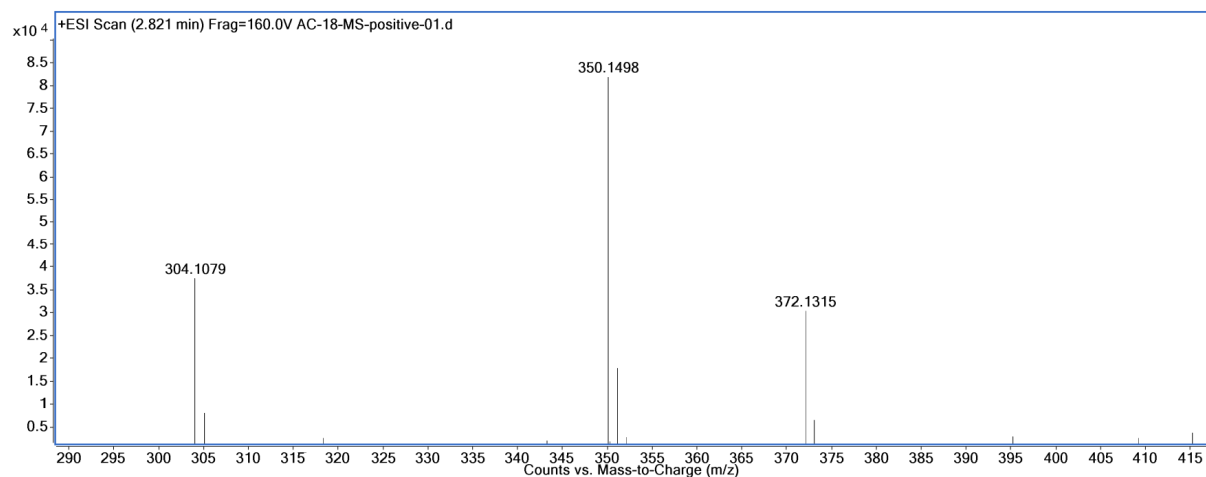

Figure S46. HRESIMS spectra of 6.

Table S1. Energies of conformers of 1 with Boltzmann distribution over 1% at MMFF.

| Label | E (kcal/mol) | rel. E (kcal/mol) | Boltzmann Dist |
|-------|--------------|-------------------|----------------|
| M0001 | 51.83        | 0.00              | 0.214          |
| M0002 | 52.03        | 0.20              | 0.153          |
| M0003 | 52.17        | 0.34              | 0.121          |
| M0004 | 52.26        | 0.43              | 0.103          |
| M0005 | 52.26        | 0.43              | 0.103          |
| M0006 | 52.55        | 0.72              | 0.064          |
| M0007 | 52.66        | 0.83              | 0.053          |
| M0008 | 52.84        | 1.01              | 0.039          |
| M0009 | 53.26        | 1.43              | 0.019          |
| M0010 | 53.45        | 1.62              | 0.014          |
| M0011 | 53.53        | 1.70              | 0.012          |
| M0012 | 53.62        | 1.79              | 0.010          |

Table S2. Gibbs free energies<sup>a</sup> and equilibrium populations<sup>b</sup> of low-energy conformers of 1.

| Conformers  | In MeOH          |              |
|-------------|------------------|--------------|
|             | <i>G</i>         | <i>P</i> (%) |
| <b>1-1</b>  | -804640.53898995 | 21.78        |
| <b>1-2</b>  | -804640.19950704 | 12.27        |
| <b>1-3</b>  | -804640.14616869 | 11.22        |
| <b>1-4</b>  | -804639.38311653 | 3.09         |
| <b>1-5</b>  | -804639.77217273 | 5.96         |
| <b>1-6</b>  | -804638.47824711 | 0.67         |
| <b>1-7</b>  | -804640.38022992 | 16.66        |
| <b>1-8</b>  | -804639.18419586 | 2.21         |
| <b>1-9</b>  | -804640.14616869 | 11.22        |
| <b>1-10</b> | -804639.64165065 | 4.78         |

|             |                  |      |
|-------------|------------------|------|
| <b>1-11</b> | -804639.93281529 | 7.82 |
| <b>1-12</b> | -804639.21243381 | 2.32 |

<sup>a</sup>B3LYP/6-31G(d,p), in kcal/mol. <sup>b</sup>From *G* values at 298.15K.

**Table S3.** Cartesian coordinates for the low-energy reoptimized MMFF conformers of **1** at B3LYP/6-31+G(d,p) level of theory in gas.

| <b>1-1</b>    |               | Standard Orientation<br>(Ångstroms) |           |           |           |
|---------------|---------------|-------------------------------------|-----------|-----------|-----------|
| Center number | Atomic number | Atomic Type                         | X         | Y         | Z         |
| 1.            | 6.            | 0.                                  | 4.644157  | 2.411265  | 0.291423  |
| 2.            | 6.            | 0.                                  | 3.805298  | 1.304376  | 0.136323  |
| 3.            | 6.            | 0.                                  | 2.437460  | 1.419027  | -0.224611 |
| 4.            | 6.            | 0.                                  | 1.920899  | 2.703780  | -0.478794 |
| 5.            | 6.            | 0.                                  | 2.749067  | 3.809151  | -0.325865 |
| 6.            | 6.            | 0.                                  | 4.095674  | 3.667392  | 0.062220  |
| 7.            | 7.            | 0.                                  | 4.080717  | -0.040490 | 0.258156  |
| 8.            | 6.            | 0.                                  | 2.958320  | -0.793353 | -0.009286 |
| 9.            | 6.            | 0.                                  | 1.903761  | 0.069691  | -0.309795 |
| 10.           | 6.            | 0.                                  | 3.050259  | -2.319121 | 0.032501  |
| 11.           | 7.            | 0.                                  | -0.748569 | 1.274035  | 0.574396  |
| 12.           | 6.            | 0.                                  | -0.619346 | 0.226627  | -0.359857 |
| 13.           | 6.            | 0.                                  | 0.562170  | -0.334789 | -0.702772 |
| 14.           | 6.            | 0.                                  | -1.885417 | 2.008200  | 0.809546  |
| 15.           | 6.            | 0.                                  | -2.986086 | 1.720500  | -0.199096 |
| 16.           | 7.            | 0.                                  | -3.019211 | 0.296191  | -0.565213 |
| 17.           | 6.            | 0.                                  | -1.885587 | -0.406431 | -0.864255 |
| 18.           | 6.            | 0.                                  | -4.424297 | 2.005275  | 0.229864  |
| 19.           | 6.            | 0.                                  | -5.216045 | 1.095870  | -0.727859 |
| 20.           | 6.            | 0.                                  | -4.392165 | -0.200003 | -0.767762 |
| 21.           | 8.            | 0.                                  | -1.894723 | -1.493102 | -1.441591 |
| 22.           | 8.            | 0.                                  | -1.972394 | 2.845059  | 1.693655  |
| 23.           | 6.            | 0.                                  | 4.266252  | -2.714397 | 0.863315  |
| 24.           | 6.            | 0.                                  | 3.136749  | -2.857227 | -1.413952 |
| 25.           | 6.            | 0.                                  | 5.389763  | -3.292762 | 0.435938  |
| 26.           | 6.            | 0.                                  | 1.819028  | -2.937233 | 0.745144  |
| 27.           | 8.            | 0.                                  | -4.848424 | -1.014020 | 0.288025  |
| 28.           | 6.            | 0.                                  | -4.373742 | -2.363634 | 0.307446  |
| 29.           | 6.            | 0.                                  | -5.212359 | -3.130251 | 1.315772  |
| 30.           | 1.            | 0.                                  | -2.747981 | 2.324147  | -1.093011 |
| 31.           | 1.            | 0.                                  | 5.686855  | 2.293109  | 0.571907  |
| 32.           | 1.            | 0.                                  | 0.892835  | 2.832783  | -0.798148 |



|     |    |    |           |           |           |
|-----|----|----|-----------|-----------|-----------|
| 33. | 1. | 0. | 2.352367  | 4.802307  | -0.513443 |
| 34. | 1. | 0. | 4.716626  | 4.550870  | 0.174571  |
| 35. | 1. | 0. | 4.971867  | -0.447905 | 0.498075  |
| 36. | 1. | 0. | 0.048147  | 1.492708  | 1.161298  |
| 37. | 1. | 0. | 0.449360  | -1.214020 | -1.328953 |
| 38. | 1. | 0. | -4.570877 | 1.696487  | 1.268152  |
| 39. | 1. | 0. | -4.677110 | 3.063364  | 0.145518  |
| 40. | 1. | 0. | -6.235420 | 0.888917  | -0.399528 |
| 41. | 1. | 0. | -5.254599 | 1.538714  | -1.729672 |
| 42. | 1. | 0. | -4.438919 | -0.747243 | -1.717160 |
| 43. | 1. | 0. | 4.168073  | -2.493994 | 1.927330  |
| 44. | 1. | 0. | 3.222737  | -3.948520 | -1.414092 |
| 45. | 1. | 0. | 2.239245  | -2.588618 | -1.976476 |
| 46. | 1. | 0. | 3.997212  | -2.440610 | -1.945595 |
| 47. | 1. | 0. | 6.183572  | -3.551300 | 1.130550  |
| 48. | 1. | 0. | 5.558428  | -3.547284 | -0.605667 |
| 49. | 1. | 0. | 1.719215  | -2.546884 | 1.762639  |
| 50. | 1. | 0. | 0.889935  | -2.727578 | 0.213301  |
| 51. | 1. | 0. | 1.940453  | -4.023286 | 0.806215  |
| 52. | 1. | 0. | -3.311866 | -2.393072 | 0.578456  |
| 53. | 1. | 0. | -4.460313 | -2.802846 | -0.696680 |
| 54. | 1. | 0. | -6.268335 | -3.120302 | 1.030116  |
| 55. | 1. | 0. | -4.877152 | -4.170592 | 1.374525  |
| 56. | 1. | 0. | -5.123479 | -2.682730 | 2.310141  |

| 1-2           |             | Standard Orientation<br>(Ångstroms) |           |           |           |
|---------------|-------------|-------------------------------------|-----------|-----------|-----------|
| Center number | Atom number | Type                                | X         | Y         | Z         |
| 1.            | 6.          | 0.                                  | 4.166535  | 2.896443  | 0.282706  |
| 2.            | 6.          | 0.                                  | 3.544364  | 1.645954  | 0.237308  |
| 3.            | 6.          | 0.                                  | 2.146764  | 1.477385  | 0.422249  |
| 4.            | 6.          | 0.                                  | 1.367873  | 2.614016  | 0.713528  |
| 5.            | 6.          | 0.                                  | 1.981039  | 3.860746  | 0.758128  |
| 6.            | 6.          | 0.                                  | 3.364669  | 4.003263  | 0.536758  |
| 7.            | 7.          | 0.                                  | 4.079350  | 0.390975  | 0.049545  |
| 8.            | 6.          | 0.                                  | 3.091366  | -0.571510 | 0.100135  |
| 9.            | 6.          | 0.                                  | 1.868599  | 0.056579  | 0.320882  |
| 10.           | 6.          | 0.                                  | 3.476396  | -2.043886 | -0.036671 |
| 11.           | 7.          | 0.                                  | -0.733788 | 0.830336  | -1.007589 |
| 12.           | 6.          | 0.                                  | -0.600519 | -0.231884 | -0.090630 |
| 13.           | 6.          | 0.                                  | 0.567842  | -0.587540 | 0.488500  |

|     |    |    |           |           |           |
|-----|----|----|-----------|-----------|-----------|
| 14. | 6. | 0. | -1.813357 | 1.060143  | -1.825792 |
| 15. | 6. | 0. | -2.838237 | -0.060322 | -1.786731 |
| 16. | 7. | 0. | -2.950026 | -0.650799 | -0.445182 |
| 17. | 6. | 0. | -1.853081 | -0.963701 | 0.308558  |
| 18. | 6. | 0. | -4.283915 | 0.285660  | -2.138614 |
| 19. | 6. | 0. | -5.043558 | -0.879017 | -1.476329 |
| 20. | 6. | 0. | -4.329027 | -1.065663 | -0.129340 |
| 21. | 8. | 0. | -1.886938 | -1.733717 | 1.266507  |
| 22. | 8. | 0. | -1.895992 | 2.027086  | -2.565984 |
| 23. | 6. | 0. | 4.801146  | -2.135056 | -0.785931 |
| 24. | 6. | 0. | 2.438443  | -2.818616 | -0.887100 |
| 25. | 6. | 0. | 5.979678  | -2.535615 | -0.306057 |
| 26. | 6. | 0. | 3.559168  | -2.670820 | 1.373556  |
| 27. | 8. | 0. | -4.962896 | -0.214536 | 0.796978  |
| 28. | 6. | 0. | -4.586330 | -0.367981 | 2.169017  |
| 29. | 6. | 0. | -5.598503 | 0.390515  | 3.010294  |
| 30. | 1. | 0. | -2.470914 | -0.824830 | -2.494806 |
| 31. | 1. | 0. | 5.237750  | 2.998778  | 0.134695  |
| 32. | 1. | 0. | 0.307007  | 2.520737  | 0.924031  |
| 33. | 1. | 0. | 1.384338  | 4.741087  | 0.976550  |
| 34. | 1. | 0. | 3.814156  | 4.990638  | 0.577732  |
| 35. | 1. | 0. | 5.050649  | 0.173489  | -0.114259 |
| 36. | 1. | 0. | 0.028144  | 1.493083  | -1.094241 |
| 37. | 1. | 0. | 0.479598  | -1.429702 | 1.169066  |
| 38. | 1. | 0. | -4.562052 | 1.239436  | -1.682431 |
| 39. | 1. | 0. | -4.438601 | 0.359509  | -3.216111 |
| 40. | 1. | 0. | -6.105017 | -0.682826 | -1.319693 |
| 41. | 1. | 0. | -4.941470 | -1.790121 | -2.076844 |
| 42. | 1. | 0. | -4.316869 | -2.095726 | 0.247464  |
| 43. | 1. | 0. | 4.739881  | -1.838972 | -1.834177 |
| 44. | 1. | 0. | 2.765264  | -3.856155 | -1.007500 |
| 45. | 1. | 0. | 1.453295  | -2.821876 | -0.418301 |
| 46. | 1. | 0. | 2.335351  | -2.373572 | -1.881429 |
| 47. | 1. | 0. | 6.856627  | -2.580538 | -0.945115 |
| 48. | 1. | 0. | 6.116872  | -2.849407 | 0.723967  |
| 49. | 1. | 0. | 4.283268  | -2.146454 | 2.003778  |
| 50. | 1. | 0. | 2.587170  | -2.615231 | 1.870408  |
| 51. | 1. | 0. | 3.850770  | -3.724179 | 1.311545  |
| 52. | 1. | 0. | -3.573612 | 0.018909  | 2.333673  |
| 53. | 1. | 0. | -4.568812 | -1.434808 | 2.433022  |
| 54. | 1. | 0. | -6.604464 | -0.014659 | 2.866600  |
| 55. | 1. | 0. | -5.340922 | 0.315869  | 4.071467  |

|     |    |    |           |          |          |
|-----|----|----|-----------|----------|----------|
| 56. | 1. | 0. | -5.613683 | 1.448711 | 2.732942 |
|-----|----|----|-----------|----------|----------|

| 1-3           |             | Standard Orientation<br>(Ångstroms) |           |           |           |
|---------------|-------------|-------------------------------------|-----------|-----------|-----------|
| Center number | Atom number | Type                                | X         | Y         | Z         |
| 1.            | 6.          | 0.                                  | -4.588818 | -2.419101 | 0.278286  |
| 2.            | 6.          | 0.                                  | -3.768987 | -1.303181 | 0.086659  |
| 3.            | 6.          | 0.                                  | -2.415410 | -1.406676 | -0.324229 |
| 4.            | 6.          | 0.                                  | -1.888519 | -2.686593 | -0.579254 |
| 5.            | 6.          | 0.                                  | -2.695830 | -3.800706 | -0.385589 |
| 6.            | 6.          | 0.                                  | -4.031127 | -3.670313 | 0.044503  |
| 7.            | 7.          | 0.                                  | -4.052126 | 0.039142  | 0.205233  |
| 8.            | 6.          | 0.                                  | -2.951820 | 0.803495  | -0.129599 |
| 9.            | 6.          | 0.                                  | -1.898140 | -0.053625 | -0.448332 |
| 10.           | 6.          | 0.                                  | -3.060284 | 2.317261  | 0.053638  |
| 11.           | 7.          | 0.                                  | 0.707536  | -1.210254 | 0.579590  |
| 12.           | 6.          | 0.                                  | 0.618026  | -0.223394 | -0.422554 |
| 13.           | 6.          | 0.                                  | -0.545676 | 0.325596  | -0.838533 |
| 14.           | 6.          | 0.                                  | 1.827188  | -1.940496 | 0.895504  |
| 15.           | 6.          | 0.                                  | 2.963676  | -1.724911 | -0.090787 |
| 16.           | 7.          | 0.                                  | 3.023030  | -0.327062 | -0.544984 |
| 17.           | 6.          | 0.                                  | 1.907032  | 0.362845  | -0.928576 |
| 18.           | 6.          | 0.                                  | 4.384550  | -1.994293 | 0.400977  |
| 19.           | 6.          | 0.                                  | 5.214991  | -1.155055 | -0.587708 |
| 20.           | 6.          | 0.                                  | 4.406745  | 0.142636  | -0.735727 |
| 21.           | 8.          | 0.                                  | 1.946279  | 1.407166  | -1.577550 |
| 22.           | 8.          | 0.                                  | 1.874563  | -2.725230 | 1.828998  |
| 23.           | 6.          | 0.                                  | -4.477264 | 2.732223  | -0.329011 |
| 24.           | 6.          | 0.                                  | -2.102817 | 3.104594  | -0.871568 |
| 25.           | 6.          | 0.                                  | -5.420341 | 3.232723  | 0.471140  |
| 26.           | 6.          | 0.                                  | -2.726785 | 2.656335  | 1.525316  |
| 27.           | 8.          | 0.                                  | 4.839599  | 1.017522  | 0.280639  |
| 28.           | 6.          | 0.                                  | 4.371593  | 2.367433  | 0.206191  |
| 29.           | 6.          | 0.                                  | 5.191463  | 3.191881  | 1.183910  |
| 30.           | 1.          | 0.                                  | 2.748482  | -2.382094 | -0.952229 |
| 31.           | 1.          | 0.                                  | -5.622647 | -2.311876 | 0.593652  |
| 32.           | 1.          | 0.                                  | -0.868860 | -2.802913 | -0.929627 |
| 33.           | 1.          | 0.                                  | -2.292839 | -4.791313 | -0.573080 |
| 34.           | 1.          | 0.                                  | -4.636259 | -4.560290 | 0.187956  |
| 35.           | 1.          | 0.                                  | -4.945982 | 0.441374  | 0.444706  |
| 36.           | 1.          | 0.                                  | -0.114895 | -1.397519 | 1.141328  |

|     |    |    |           |           |           |
|-----|----|----|-----------|-----------|-----------|
| 37. | 1. | 0. | -0.407564 | 1.155158  | -1.521254 |
| 38. | 1. | 0. | 4.503008  | -1.620615 | 1.421404  |
| 39. | 1. | 0. | 4.628303  | -3.057790 | 0.392393  |
| 40. | 1. | 0. | 6.225964  | -0.936410 | -0.241457 |
| 41. | 1. | 0. | 5.279703  | -1.661648 | -1.557466 |
| 42. | 1. | 0. | 4.488265  | 0.628239  | -1.715768 |
| 43. | 1. | 0. | -4.708618 | 2.593740  | -1.385861 |
| 44. | 1. | 0. | -2.314813 | 4.173967  | -0.779331 |
| 45. | 1. | 0. | -1.056723 | 2.947990  | -0.602277 |
| 46. | 1. | 0. | -2.236109 | 2.822534  | -1.920448 |
| 47. | 1. | 0. | -6.393982 | 3.511711  | 0.079345  |
| 48. | 1. | 0. | -5.259953 | 3.403388  | 1.531119  |
| 49. | 1. | 0. | -3.391955 | 2.136564  | 2.220966  |
| 50. | 1. | 0. | -1.702137 | 2.350819  | 1.752020  |
| 51. | 1. | 0. | -2.811699 | 3.733256  | 1.703341  |
| 52. | 1. | 0. | 3.304192  | 2.417264  | 0.451980  |
| 53. | 1. | 0. | 4.481860  | 2.743509  | -0.820831 |
| 54. | 1. | 0. | 6.253015  | 3.163471  | 0.921144  |
| 55. | 1. | 0. | 4.857846  | 4.234349  | 1.173587  |
| 56. | 1. | 0. | 5.081130  | 2.804617  | 2.201164  |

| 1-4           |             | Standard Orientation<br>(Ångstroms) |           |           |           |
|---------------|-------------|-------------------------------------|-----------|-----------|-----------|
| Center number | Atom number | Type                                | X         | Y         | Z         |
| 1.            | 6.          | 0.                                  | -4.937502 | -2.077982 | 0.366335  |
| 2.            | 6.          | 0.                                  | -4.027202 | -1.033271 | 0.187246  |
| 3.            | 6.          | 0.                                  | -2.677887 | -1.242482 | -0.198194 |
| 4.            | 6.          | 0.                                  | -2.258022 | -2.561440 | -0.456712 |
| 5.            | 6.          | 0.                                  | -3.157485 | -3.606073 | -0.281443 |
| 6.            | 6.          | 0.                                  | -4.482352 | -3.370374 | 0.134105  |
| 7.            | 7.          | 0.                                  | -4.212174 | 0.329096  | 0.299490  |
| 8.            | 6.          | 0.                                  | -3.045605 | 1.003293  | 0.002894  |
| 9.            | 6.          | 0.                                  | -2.056042 | 0.067288  | -0.299334 |
| 10.           | 6.          | 0.                                  | -2.992395 | 2.529090  | 0.021564  |
| 11.           | 7.          | 0.                                  | 0.506914  | -1.346006 | 0.541846  |
| 12.           | 6.          | 0.                                  | 0.449137  | -0.266091 | -0.364054 |
| 13.           | 6.          | 0.                                  | -0.690151 | 0.389818  | -0.682309 |
| 14.           | 6.          | 0.                                  | 1.588396  | -2.164741 | 0.754228  |
| 15.           | 6.          | 0.                                  | 2.701369  | -1.933380 | -0.254865 |
| 16.           | 7.          | 0.                                  | 2.837093  | -0.505634 | -0.581192 |
| 17.           | 6.          | 0.                                  | 1.755048  | 0.283292  | -0.863886 |

|     |    |    |           |           |           |
|-----|----|----|-----------|-----------|-----------|
| 18. | 6. | 0. | 4.117073  | -2.335000 | 0.154174  |
| 19. | 6. | 0. | 4.966750  | -1.462290 | -0.787997 |
| 20. | 6. | 0. | 4.240322  | -0.108966 | -0.788704 |
| 21. | 8. | 0. | 1.843089  | 1.373007  | -1.427655 |
| 22. | 8. | 0. | 1.619780  | -3.024025 | 1.620909  |
| 23. | 6. | 0. | -1.774046 | 2.977062  | 0.820334  |
| 24. | 6. | 0. | -4.234681 | 3.114397  | 0.742482  |
| 25. | 6. | 0. | -0.826302 | 3.830137  | 0.435834  |
| 26. | 6. | 0. | -2.983911 | 3.055717  | -1.431896 |
| 27. | 8. | 0. | 4.766952  | 0.643994  | 0.280503  |
| 28. | 6. | 0. | 4.375531  | 2.018110  | 0.346703  |
| 29. | 6. | 0. | 5.268145  | 2.700361  | 1.369313  |
| 30. | 1. | 0. | 2.413983  | -2.493054 | -1.162941 |
| 31. | 1. | 0. | -5.963931 | -1.886567 | 0.666238  |
| 32. | 1. | 0. | -1.248925 | -2.763610 | -0.797149 |
| 33. | 1. | 0. | -2.834496 | -4.624810 | -0.473046 |
| 34. | 1. | 0. | -5.160458 | -4.208150 | 0.264337  |
| 35. | 1. | 0. | -5.068452 | 0.770358  | 0.590475  |
| 36. | 1. | 0. | -0.295454 | -1.513175 | 1.137602  |
| 37. | 1. | 0. | -0.515109 | 1.291654  | -1.257597 |
| 38. | 1. | 0. | 4.293451  | -2.064281 | 1.198443  |
| 39. | 1. | 0. | 4.290088  | -3.406420 | 0.041186  |
| 40. | 1. | 0. | 6.001178  | -1.339516 | -0.464319 |
| 41. | 1. | 0. | 4.965021  | -1.881384 | -1.800715 |
| 42. | 1. | 0. | 4.318881  | 0.456089  | -1.725604 |
| 43. | 1. | 0. | -1.726632 | 2.555754  | 1.824516  |
| 44. | 1. | 0. | -4.151864 | 4.203285  | 0.778149  |
| 45. | 1. | 0. | -5.163527 | 2.876704  | 0.209902  |
| 46. | 1. | 0. | -4.315183 | 2.753044  | 1.773033  |
| 47. | 1. | 0. | -0.015693 | 4.098316  | 1.105855  |
| 48. | 1. | 0. | -0.799586 | 4.276655  | -0.552830 |
| 49. | 1. | 0. | -2.107487 | 2.711150  | -1.985102 |
| 50. | 1. | 0. | -3.874237 | 2.706344  | -1.962860 |
| 51. | 1. | 0. | -2.988739 | 4.150265  | -1.445957 |
| 52. | 1. | 0. | 3.319783  | 2.103409  | 0.630091  |
| 53. | 1. | 0. | 4.479174  | 2.483070  | -0.644164 |
| 54. | 1. | 0. | 6.319009  | 2.635544  | 1.072226  |
| 55. | 1. | 0. | 4.997694  | 3.756830  | 1.464091  |
| 56. | 1. | 0. | 5.160993  | 2.227650  | 2.350151  |

|            |                                     |
|------------|-------------------------------------|
| <b>1-5</b> | Standard Orientation<br>(Ångstroms) |
|------------|-------------------------------------|

| Center number | Atom number | Type | X         | Y         | Z         |
|---------------|-------------|------|-----------|-----------|-----------|
| 1.            | 6.          | 0.   | -4.106763 | 2.925798  | -0.137625 |
| 2.            | 6.          | 0.   | -3.505320 | 1.665401  | -0.195062 |
| 3.            | 6.          | 0.   | -2.118707 | 1.489976  | -0.441241 |
| 4.            | 6.          | 0.   | -1.326105 | 2.631273  | -0.669160 |
| 5.            | 6.          | 0.   | -1.917431 | 3.887592  | -0.605833 |
| 6.            | 6.          | 0.   | -3.292366 | 4.034670  | -0.336991 |
| 7.            | 7.          | 0.   | -4.052485 | 0.408505  | -0.073279 |
| 8.            | 6.          | 0.   | -3.085159 | -0.564346 | -0.246269 |
| 9.            | 6.          | 0.   | -1.859799 | 0.061433  | -0.456452 |
| 10.           | 6.          | 0.   | -3.495205 | -2.021273 | -0.042476 |
| 11.           | 7.          | 0.   | 0.684541  | 0.712331  | 1.015864  |
| 12.           | 6.          | 0.   | 0.592317  | -0.259442 | -0.000952 |
| 13.           | 6.          | 0.   | -0.551797 | -0.564506 | -0.652736 |
| 14.           | 6.          | 0.   | 1.733739  | 0.870660  | 1.888222  |
| 15.           | 6.          | 0.   | 2.768421  | -0.236458 | 1.780859  |
| 16.           | 7.          | 0.   | 2.932097  | -0.697569 | 0.394664  |
| 17.           | 6.          | 0.   | 1.865497  | -0.940988 | -0.425265 |
| 18.           | 6.          | 0.   | 4.197581  | 0.084474  | 2.214054  |
| 19.           | 6.          | 0.   | 4.991354  | -1.007347 | 1.472931  |
| 20.           | 6.          | 0.   | 4.325105  | -1.072550 | 0.089980  |
| 21.           | 8.          | 0.   | 1.939987  | -1.613250 | -1.451849 |
| 22.           | 8.          | 0.   | 1.785139  | 1.766187  | 2.715921  |
| 23.           | 6.          | 0.   | -4.904781 | -2.193235 | -0.597906 |
| 24.           | 6.          | 0.   | -3.414861 | -2.348485 | 1.466627  |
| 25.           | 6.          | 0.   | -6.014582 | -2.485537 | 0.082567  |
| 26.           | 6.          | 0.   | -2.584088 | -2.999901 | -0.818609 |
| 27.           | 8.          | 0.   | 4.982158  | -0.135260 | -0.730860 |
| 28.           | 6.          | 0.   | 4.665257  | -0.171713 | -2.126001 |
| 29.           | 6.          | 0.   | 5.698656  | 0.671103  | -2.853525 |
| 30.           | 1.          | 0.   | 2.384150  | -1.066430 | 2.400722  |
| 31.           | 1.          | 0.   | -5.170782 | 3.034940  | 0.051473  |
| 32.           | 1.          | 0.   | -0.272045 | 2.533913  | -0.910361 |
| 33.           | 1.          | 0.   | -1.311323 | 4.772339  | -0.774808 |
| 34.           | 1.          | 0.   | -3.725221 | 5.029416  | -0.294167 |
| 35.           | 1.          | 0.   | -5.028500 | 0.193069  | 0.063910  |
| 36.           | 1.          | 0.   | -0.080465 | 1.368025  | 1.127255  |
| 37.           | 1.          | 0.   | -0.432626 | -1.328064 | -1.413789 |
| 38.           | 1.          | 0.   | 4.481604  | 1.078703  | 1.859130  |
| 39.           | 1.          | 0.   | 4.314478  | 0.058173  | 3.298495  |
| 40.           | 1.          | 0.   | 6.055340  | -0.789485 | 1.372104  |

|     |    |    |           |           |           |
|-----|----|----|-----------|-----------|-----------|
| 41. | 1. | 0. | 4.879026  | -1.971352 | 1.982216  |
| 42. | 1. | 0. | 4.335930  | -2.063350 | -0.380451 |
| 43. | 1. | 0. | -4.974801 | -2.057890 | -1.677901 |
| 44. | 1. | 0. | -3.718740 | -3.383177 | 1.655750  |
| 45. | 1. | 0. | -2.387544 | -2.221887 | 1.817583  |
| 46. | 1. | 0. | -4.053133 | -1.686178 | 2.058580  |
| 47. | 1. | 0. | -6.966868 | -2.601513 | -0.426344 |
| 48. | 1. | 0. | -6.020088 | -2.639580 | 1.157174  |
| 49. | 1. | 0. | -2.549297 | -2.755197 | -1.884575 |
| 50. | 1. | 0. | -1.563759 | -2.990814 | -0.430506 |
| 51. | 1. | 0. | -2.975143 | -4.016519 | -0.715954 |
| 52. | 1. | 0. | 3.653843  | 0.214483  | -2.299520 |
| 53. | 1. | 0. | 4.677191  | -1.211326 | -2.482824 |
| 54. | 1. | 0. | 5.683933  | 1.701120  | -2.485026 |
| 55. | 1. | 0. | 6.704564  | 0.268613  | -2.702104 |
| 56. | 1. | 0. | 5.487152  | 0.686085  | -3.927331 |

| 1-6           |             | Standard Orientation<br>(Ångstroms) |           |           |           |
|---------------|-------------|-------------------------------------|-----------|-----------|-----------|
| Center number | Atom number | Type                                | X         | Y         | Z         |
| 1.            | 6.          | 0.                                  | 4.459124  | 2.734357  | 0.264641  |
| 2.            | 6.          | 0.                                  | 3.770656  | 1.519231  | 0.228049  |
| 3.            | 6.          | 0.                                  | 2.367636  | 1.424467  | 0.420723  |
| 4.            | 6.          | 0.                                  | 1.654130  | 2.601888  | 0.718734  |
| 5.            | 6.          | 0.                                  | 2.332839  | 3.814545  | 0.755597  |
| 6.            | 6.          | 0.                                  | 3.719575  | 3.883422  | 0.520892  |
| 7.            | 7.          | 0.                                  | 4.242392  | 0.236063  | 0.049277  |
| 8.            | 6.          | 0.                                  | 3.204997  | -0.674378 | 0.112935  |
| 9.            | 6.          | 0.                                  | 2.016791  | 0.019946  | 0.323886  |
| 10.           | 6.          | 0.                                  | 3.463627  | -2.173027 | -0.010776 |
| 11.           | 7.          | 0.                                  | -0.569679 | 0.970238  | -0.952060 |
| 12.           | 6.          | 0.                                  | -0.465600 | -0.144801 | -0.094272 |
| 13.           | 6.          | 0.                                  | 0.691191  | -0.574907 | 0.457269  |
| 14.           | 6.          | 0.                                  | -1.643900 | 1.279319  | -1.750005 |
| 15.           | 6.          | 0.                                  | -2.710855 | 0.198962  | -1.758753 |
| 16.           | 7.          | 0.                                  | -2.831548 | -0.460084 | -0.451022 |
| 17.           | 6.          | 0.                                  | -1.739002 | -0.856150 | 0.271268  |
| 18.           | 6.          | 0.                                  | -4.145417 | 0.619655  | -2.071990 |
| 19.           | 6.          | 0.                                  | -4.942631 | -0.551534 | -1.468528 |
| 20.           | 6.          | 0.                                  | -4.220958 | -0.843232 | -0.143732 |
| 21.           | 8.          | 0.                                  | -1.795409 | -1.679358 | 1.182811  |

|     |    |    |           |           |           |
|-----|----|----|-----------|-----------|-----------|
| 22. | 8. | 0. | -1.693573 | 2.283860  | -2.442396 |
| 23. | 6. | 0. | 2.460696  | -2.776946 | -0.986466 |
| 24. | 6. | 0. | 3.391602  | -2.814824 | 1.393822  |
| 25. | 6. | 0. | 1.694905  | -3.849216 | -0.791278 |
| 26. | 6. | 0. | 4.873403  | -2.442578 | -0.598789 |
| 27. | 8. | 0. | -4.816007 | -0.025699 | 0.837990  |
| 28. | 6. | 0. | -4.422623 | -0.262198 | 2.193099  |
| 29. | 6. | 0. | -5.404587 | 0.471447  | 3.090546  |
| 30. | 1. | 0. | -2.381996 | -0.538302 | -2.513297 |
| 31. | 1. | 0. | 5.533359  | 2.779151  | 0.109225  |
| 32. | 1. | 0. | 0.592830  | 2.566321  | 0.943493  |
| 33. | 1. | 0. | 1.785649  | 4.725162  | 0.979218  |
| 34. | 1. | 0. | 4.221407  | 4.845480  | 0.554976  |
| 35. | 1. | 0. | 5.200513  | -0.003075 | -0.143878 |
| 36. | 1. | 0. | 0.217077  | 1.605050  | -1.021138 |
| 37. | 1. | 0. | 0.576439  | -1.464854 | 1.066727  |
| 38. | 1. | 0. | -4.381974 | 1.554890  | -1.557539 |
| 39. | 1. | 0. | -4.308601 | 0.762352  | -3.141316 |
| 40. | 1. | 0. | -5.993783 | -0.324175 | -1.286435 |
| 41. | 1. | 0. | -4.883389 | -1.429291 | -2.122284 |
| 42. | 1. | 0. | -4.243005 | -1.893187 | 0.172864  |
| 43. | 1. | 0. | 2.423752  | -2.271884 | -1.951552 |
| 44. | 1. | 0. | 3.618601  | -3.884523 | 1.343426  |
| 45. | 1. | 0. | 4.122103  | -2.345091 | 2.058843  |
| 46. | 1. | 0. | 2.402900  | -2.695858 | 1.843070  |
| 47. | 1. | 0. | 1.039664  | -4.214911 | -1.575665 |
| 48. | 1. | 0. | 1.671841  | -4.393624 | 0.147154  |
| 49. | 1. | 0. | 4.998532  | -1.982870 | -1.584724 |
| 50. | 1. | 0. | 5.666441  | -2.077636 | 0.065101  |
| 51. | 1. | 0. | 5.018262  | -3.519433 | -0.713350 |
| 52. | 1. | 0. | -3.399216 | 0.093624  | 2.362114  |
| 53. | 1. | 0. | -4.424649 | -1.341789 | 2.398914  |
| 54. | 1. | 0. | -5.400232 | 1.543188  | 2.870660  |
| 55. | 1. | 0. | -6.421510 | 0.096589  | 2.941642  |
| 56. | 1. | 0. | -5.132854 | 0.334062  | 4.141902  |

| 1-7           |             | Standard Orientation<br>(Ångstroms) |           |           |          |
|---------------|-------------|-------------------------------------|-----------|-----------|----------|
| Center number | Atom number | Type                                | X         | Y         | Z        |
| 1.            | 6.          | 0.                                  | -4.887181 | -2.163875 | 0.352398 |
| 2.            | 6.          | 0.                                  | -3.992895 | -1.098473 | 0.220733 |



|     |    |    |           |           |           |
|-----|----|----|-----------|-----------|-----------|
| 3.  | 6. | 0. | -2.645215 | -1.268204 | -0.189149 |
| 4.  | 6. | 0. | -2.209961 | -2.565682 | -0.520646 |
| 5.  | 6. | 0. | -3.093203 | -3.630700 | -0.392106 |
| 6.  | 6. | 0. | -4.416983 | -3.435611 | 0.047503  |
| 7.  | 7. | 0. | -4.194915 | 0.253392  | 0.407820  |
| 8.  | 6. | 0. | -3.042151 | 0.958847  | 0.132417  |
| 9.  | 6. | 0. | -2.043046 | 0.053439  | -0.229887 |
| 10. | 6. | 0. | -2.992602 | 2.479850  | 0.262851  |
| 11. | 7. | 0. | 0.549759  | -1.358935 | 0.518822  |
| 12. | 6. | 0. | 0.468103  | -0.225162 | -0.317148 |
| 13. | 6. | 0. | -0.685915 | 0.422336  | -0.599500 |
| 14. | 6. | 0. | 1.640983  | -2.181341 | 0.656058  |
| 15. | 6. | 0. | 2.734328  | -1.867792 | -0.352528 |
| 16. | 7. | 0. | 2.856177  | -0.418062 | -0.569937 |
| 17. | 6. | 0. | 1.764528  | 0.380430  | -0.776990 |
| 18. | 6. | 0. | 4.159287  | -2.290955 | -0.001479 |
| 19. | 6. | 0. | 4.987948  | -1.339382 | -0.884224 |
| 20. | 6. | 0. | 4.253961  | 0.004364  | -0.762919 |
| 21. | 8. | 0. | 1.836871  | 1.515663  | -1.244941 |
| 22. | 8. | 0. | 1.693597  | -3.099170 | 1.459184  |
| 23. | 6. | 0. | -2.707693 | 3.063290  | -1.118257 |
| 24. | 6. | 0. | -1.934006 | 2.881555  | 1.312264  |
| 25. | 6. | 0. | -1.701628 | 3.865941  | -1.464981 |
| 26. | 6. | 0. | -4.362833 | 3.042001  | 0.716415  |
| 27. | 8. | 0. | 4.792666  | 0.669512  | 0.357006  |
| 28. | 6. | 0. | 4.396696  | 2.031435  | 0.542158  |
| 29. | 6. | 0. | 5.307408  | 2.634469  | 1.598017  |
| 30. | 1. | 0. | 2.432227  | -2.357461 | -1.295532 |
| 31. | 1. | 0. | -5.912892 | -2.003216 | 0.672134  |
| 32. | 1. | 0. | -1.201554 | -2.734751 | -0.880718 |
| 33. | 1. | 0. | -2.758333 | -4.633385 | -0.639733 |
| 34. | 1. | 0. | -5.082407 | -4.288487 | 0.139614  |
| 35. | 1. | 0. | -5.058823 | 0.668434  | 0.714421  |
| 36. | 1. | 0. | -0.245792 | -1.579326 | 1.106357  |
| 37. | 1. | 0. | -0.545160 | 1.357460  | -1.132393 |
| 38. | 1. | 0. | 4.352790  | -2.104660 | 1.058113  |
| 39. | 1. | 0. | 4.336369  | -3.348507 | -0.203738 |
| 40. | 1. | 0. | 6.027020  | -1.236090 | -0.568806 |
| 41. | 1. | 0. | 4.971148  | -1.675195 | -1.927396 |
| 42. | 1. | 0. | 4.314790  | 0.645480  | -1.650844 |
| 43. | 1. | 0. | -3.440493 | 2.781385  | -1.874838 |
| 44. | 1. | 0. | -1.901209 | 3.969942  | 1.424312  |

|     |    |    |           |          |           |
|-----|----|----|-----------|----------|-----------|
| 45. | 1. | 0. | -2.186803 | 2.447629 | 2.284335  |
| 46. | 1. | 0. | -0.937021 | 2.531836 | 1.037419  |
| 47. | 1. | 0. | -1.609785 | 4.234802 | -2.481842 |
| 48. | 1. | 0. | -0.928635 | 4.174960 | -0.769316 |
| 49. | 1. | 0. | -5.158115 | 2.813801 | -0.001977 |
| 50. | 1. | 0. | -4.650592 | 2.654312 | 1.700573  |
| 51. | 1. | 0. | -4.299724 | 4.129987 | 0.795168  |
| 52. | 1. | 0. | 3.346807  | 2.086732 | 0.853813  |
| 53. | 1. | 0. | 4.477229  | 2.575091 | -0.409965 |
| 54. | 1. | 0. | 5.223340  | 2.083049 | 2.539190  |
| 55. | 1. | 0. | 6.352004  | 2.600773 | 1.274812  |
| 56. | 1. | 0. | 5.033814  | 3.677921 | 1.783905  |

| <b>1-8</b>    |             | Standard Orientation<br>(Ångstroms) |           |           |           |
|---------------|-------------|-------------------------------------|-----------|-----------|-----------|
| Center number | Atom number | Type                                | X         | Y         | Z         |
| 1.            | 6.          | 0.                                  | 4.447234  | 2.710820  | 0.475628  |
| 2.            | 6.          | 0.                                  | 3.759757  | 1.506330  | 0.307429  |
| 3.            | 6.          | 0.                                  | 2.359980  | 1.385041  | 0.509477  |
| 4.            | 6.          | 0.                                  | 1.648960  | 2.518605  | 0.950184  |
| 5.            | 6.          | 0.                                  | 2.326558  | 3.720848  | 1.117049  |
| 6.            | 6.          | 0.                                  | 3.710013  | 3.820285  | 0.873622  |
| 7.            | 7.          | 0.                                  | 4.230785  | 0.254576  | -0.028235 |
| 8.            | 6.          | 0.                                  | 3.197529  | -0.661709 | -0.049340 |
| 9.            | 6.          | 0.                                  | 2.010611  | -0.000535 | 0.259832  |
| 10.           | 6.          | 0.                                  | 3.442264  | -2.130048 | -0.388807 |
| 11.           | 7.          | 0.                                  | -0.589810 | 1.075175  | -0.874206 |
| 12.           | 6.          | 0.                                  | -0.473834 | -0.132829 | -0.155012 |
| 13.           | 6.          | 0.                                  | 0.690276  | -0.615293 | 0.337027  |
| 14.           | 6.          | 0.                                  | -1.670185 | 1.469380  | -1.625312 |
| 15.           | 6.          | 0.                                  | -2.730035 | 0.390073  | -1.756646 |
| 16.           | 7.          | 0.                                  | -2.840309 | -0.417879 | -0.534458 |
| 17.           | 6.          | 0.                                  | -1.742118 | -0.888643 | 0.132769  |
| 18.           | 6.          | 0.                                  | -4.168747 | 0.834702  | -2.013317 |
| 19.           | 6.          | 0.                                  | -4.956347 | -0.402986 | -1.544666 |
| 20.           | 6.          | 0.                                  | -4.226380 | -0.838983 | -0.265067 |
| 21.           | 8.          | 0.                                  | -1.789992 | -1.812234 | 0.942643  |
| 22.           | 8.          | 0.                                  | -1.729837 | 2.548511  | -2.193346 |
| 23.           | 6.          | 0.                                  | 3.042958  | -2.962764 | 0.825812  |
| 24.           | 6.          | 0.                                  | 4.944911  | -2.398424 | -0.649557 |
| 25.           | 6.          | 0.                                  | 2.150685  | -3.951876 | 0.869270  |

|     |    |    |           |           |           |
|-----|----|----|-----------|-----------|-----------|
| 26. | 6. | 0. | 2.652669  | -2.509429 | -1.659694 |
| 27. | 8. | 0. | -4.818809 | -0.139499 | 0.805405  |
| 28. | 6. | 0. | -4.417308 | -0.526070 | 2.123231  |
| 29. | 6. | 0. | -5.399577 | 0.093317  | 3.102718  |
| 30. | 1. | 0. | -2.399236 | -0.251446 | -2.593442 |
| 31. | 1. | 0. | 5.519020  | 2.776477  | 0.310969  |
| 32. | 1. | 0. | 0.590612  | 2.454921  | 1.183035  |
| 33. | 1. | 0. | 1.781215  | 4.598227  | 1.450921  |
| 34. | 1. | 0. | 4.211025  | 4.773359  | 1.012088  |
| 35. | 1. | 0. | 5.190216  | 0.037846  | -0.240400 |
| 36. | 1. | 0. | 0.192671  | 1.719019  | -0.870724 |
| 37. | 1. | 0. | 0.598246  | -1.571123 | 0.843881  |
| 38. | 1. | 0. | -4.407845 | 1.703159  | -1.393792 |
| 39. | 1. | 0. | -4.338120 | 1.098312  | -3.058416 |
| 40. | 1. | 0. | -6.007963 | -0.204702 | -1.333636 |
| 41. | 1. | 0. | -4.894604 | -1.199965 | -2.294554 |
| 42. | 1. | 0. | -4.243000 | -1.918023 | -0.068756 |
| 43. | 1. | 0. | 3.578898  | -2.697191 | 1.737385  |
| 44. | 1. | 0. | 5.090150  | -3.457313 | -0.877033 |
| 45. | 1. | 0. | 5.313798  | -1.822364 | -1.506241 |
| 46. | 1. | 0. | 5.561042  | -2.166255 | 0.226242  |
| 47. | 1. | 0. | 1.957615  | -4.487914 | 1.793235  |
| 48. | 1. | 0. | 1.573961  | -4.260413 | 0.003406  |
| 49. | 1. | 0. | 1.580206  | -2.351947 | -1.528218 |
| 50. | 1. | 0. | 2.981803  | -1.894866 | -2.502840 |
| 51. | 1. | 0. | 2.821949  | -3.559677 | -1.917791 |
| 52. | 1. | 0. | -3.395421 | -0.184595 | 2.327551  |
| 53. | 1. | 0. | -4.411210 | -1.622057 | 2.204659  |
| 54. | 1. | 0. | -5.402356 | 1.183266  | 3.007924  |
| 55. | 1. | 0. | -6.414936 | -0.268222 | 2.915220  |
| 56. | 1. | 0. | -5.122537 | -0.162720 | 4.130224  |

| <b>1-9</b>    |             | Standard Orientation<br>(Ångstroms) |           |           |           |
|---------------|-------------|-------------------------------------|-----------|-----------|-----------|
| Center number | Atom number | Type                                | X         | Y         | Z         |
| 1.            | 6.          | 0.                                  | -4.588037 | -2.419732 | 0.278799  |
| 2.            | 6.          | 0.                                  | -3.768507 | -1.303628 | 0.086975  |
| 3.            | 6.          | 0.                                  | -2.414967 | -1.406838 | -0.324098 |
| 4.            | 6.          | 0.                                  | -1.887787 | -2.686642 | -0.579044 |
| 5.            | 6.          | 0.                                  | -2.694809 | -3.800939 | -0.385200 |
| 6.            | 6.          | 0.                                  | -4.030085 | -3.670832 | 0.045032  |

|     |    |    |           |           |           |
|-----|----|----|-----------|-----------|-----------|
| 7.  | 7. | 0. | -4.051912 | 0.038637  | 0.205620  |
| 8.  | 6. | 0. | -2.951855 | 0.803225  | -0.129541 |
| 9.  | 6. | 0. | -1.898045 | -0.053667 | -0.448370 |
| 10. | 6. | 0. | -3.060761 | 2.316985  | 0.053534  |
| 11. | 7. | 0. | 0.707849  | -1.209425 | 0.579839  |
| 12. | 6. | 0. | 0.618122  | -0.222906 | -0.422612 |
| 13. | 6. | 0. | -0.545666 | 0.325804  | -0.838690 |
| 14. | 6. | 0. | 1.827440  | -1.939936 | 0.895412  |
| 15. | 6. | 0. | 2.963717  | -1.724309 | -0.091124 |
| 16. | 7. | 0. | 3.023103  | -0.326358 | -0.544973 |
| 17. | 6. | 0. | 1.907055  | 0.363410  | -0.928805 |
| 18. | 6. | 0. | 4.384723  | -1.993994 | 0.400100  |
| 19. | 6. | 0. | 5.214925  | -1.154666 | -0.588725 |
| 20. | 6. | 0. | 4.406814  | 0.143156  | -0.736117 |
| 21. | 8. | 0. | 1.946223  | 1.407612  | -1.577921 |
| 22. | 8. | 0. | 1.874863  | -2.724824 | 1.828764  |
| 23. | 6. | 0. | -4.477664 | 2.731507  | -0.329881 |
| 24. | 6. | 0. | -2.103021 | 3.104514  | -0.871218 |
| 25. | 6. | 0. | -5.421376 | 3.231618  | 0.469767  |
| 26. | 6. | 0. | -2.728152 | 2.656246  | 1.525370  |
| 27. | 8. | 0. | 4.840222  | 1.017628  | 0.280386  |
| 28. | 6. | 0. | 4.370893  | 2.367154  | 0.207409  |
| 29. | 6. | 0. | 5.190292  | 3.191440  | 1.185644  |
| 30. | 1. | 0. | 2.748150  | -2.381256 | -0.952654 |
| 31. | 1. | 0. | -5.621845 | -2.312725 | 0.594312  |
| 32. | 1. | 0. | -0.868139 | -2.802764 | -0.929519 |
| 33. | 1. | 0. | -2.291594 | -4.791464 | -0.572643 |
| 34. | 1. | 0. | -4.634988 | -4.560943 | 0.188615  |
| 35. | 1. | 0. | -4.945960 | 0.440670  | 0.444706  |
| 36. | 1. | 0. | -0.114616 | -1.396910 | 1.141454  |
| 37. | 1. | 0. | -0.407721 | 1.155184  | -1.521670 |
| 38. | 1. | 0. | 4.503570  | -1.620527 | 1.420554  |
| 39. | 1. | 0. | 4.628341  | -3.057521 | 0.391190  |
| 40. | 1. | 0. | 6.226068  | -0.936263 | -0.242815 |
| 41. | 1. | 0. | 5.279170  | -1.661066 | -1.558611 |
| 42. | 1. | 0. | 4.487958  | 0.629140  | -1.716009 |
| 43. | 1. | 0. | -4.708369 | 2.592978  | -1.386867 |
| 44. | 1. | 0. | -2.315221 | 4.173842  | -0.778983 |
| 45. | 1. | 0. | -1.057020 | 2.948006  | -0.601513 |
| 46. | 1. | 0. | -2.235857 | 2.822504  | -1.920169 |
| 47. | 1. | 0. | -6.394900 | 3.510260  | 0.077438  |
| 48. | 1. | 0. | -5.261667 | 3.402222  | 1.529859  |

|     |    |    |           |          |           |
|-----|----|----|-----------|----------|-----------|
| 49. | 1. | 0. | -3.393580 | 2.136352 | 2.220676  |
| 50. | 1. | 0. | -1.703550 | 2.351010 | 1.752650  |
| 51. | 1. | 0. | -2.813448 | 3.733159 | 1.703258  |
| 52. | 1. | 0. | 3.303522  | 2.415725 | 0.453642  |
| 53. | 1. | 0. | 4.480362  | 2.744289 | -0.819317 |
| 54. | 1. | 0. | 5.080622  | 2.803068 | 2.202545  |
| 55. | 1. | 0. | 6.251785  | 3.164296 | 0.922522  |
| 56. | 1. | 0. | 4.855690  | 4.233602 | 1.176427  |

| <b>1-10</b>   |             | Standard Orientation<br>(Ångstroms) |           |           |           |
|---------------|-------------|-------------------------------------|-----------|-----------|-----------|
| Center number | Atom number | Type                                | X         | Y         | Z         |
| 1.            | 6.          | 0.                                  | -4.769690 | -2.296893 | -0.006026 |
| 2.            | 6.          | 0.                                  | -3.891289 | -1.210373 | -0.036278 |
| 3.            | 6.          | 0.                                  | -2.515839 | -1.341468 | -0.361420 |
| 4.            | 6.          | 0.                                  | -2.031482 | -2.616489 | -0.710265 |
| 5.            | 6.          | 0.                                  | -2.899330 | -3.701406 | -0.682019 |
| 6.            | 6.          | 0.                                  | -4.253666 | -3.546751 | -0.326874 |
| 7.            | 7.          | 0.                                  | -4.127449 | 0.128003  | 0.191575  |
| 8.            | 6.          | 0.                                  | -2.972192 | 0.861108  | 0.026318  |
| 9.            | 6.          | 0.                                  | -1.936410 | -0.009815 | -0.312163 |
| 10.           | 6.          | 0.                                  | -3.017914 | 2.380719  | 0.190636  |
| 11.           | 7.          | 0.                                  | 0.629142  | -1.367024 | 0.584299  |
| 12.           | 6.          | 0.                                  | 0.578620  | -0.248006 | -0.269316 |
| 13.           | 6.          | 0.                                  | -0.567226 | 0.377052  | -0.621383 |
| 14.           | 6.          | 0.                                  | 1.735639  | -2.132935 | 0.851239  |
| 15.           | 6.          | 0.                                  | 2.926208  | -1.809623 | -0.037994 |
| 16.           | 7.          | 0.                                  | 2.985650  | -0.387186 | -0.398935 |
| 17.           | 6.          | 0.                                  | 1.885638  | 0.372294  | -0.668621 |
| 18.           | 6.          | 0.                                  | 4.310592  | -2.075351 | 0.556401  |
| 19.           | 6.          | 0.                                  | 5.198234  | -1.158382 | -0.302195 |
| 20.           | 6.          | 0.                                  | 4.366499  | 0.126758  | -0.467289 |
| 21.           | 8.          | 0.                                  | 1.950914  | 1.501762  | -1.156283 |
| 22.           | 8.          | 0.                                  | 1.741539  | -3.033780 | 1.675381  |
| 23.           | 6.          | 0.                                  | -4.243691 | 2.746312  | 1.020975  |
| 24.           | 6.          | 0.                                  | -3.050350 | 3.035477  | -1.209188 |
| 25.           | 6.          | 0.                                  | -5.339742 | 3.387895  | 0.612813  |
| 26.           | 6.          | 0.                                  | -1.788143 | 2.900012  | 0.980050  |
| 27.           | 8.          | 0.                                  | 4.641428  | 1.006058  | 0.599416  |
| 28.           | 6.          | 0.                                  | 4.682753  | 2.405984  | 0.276936  |
| 29.           | 6.          | 0.                                  | 6.066749  | 2.837760  | -0.195966 |

|     |    |    |           |           |           |
|-----|----|----|-----------|-----------|-----------|
| 30. | 1. | 0. | 2.799525  | -2.419027 | -0.950443 |
| 31. | 1. | 0. | -5.817482 | -2.167433 | 0.249387  |
| 32. | 1. | 0. | -0.997371 | -2.752321 | -1.006966 |
| 33. | 1. | 0. | -2.528404 | -4.687816 | -0.943455 |
| 34. | 1. | 0. | -4.906138 | -4.414417 | -0.313117 |
| 35. | 1. | 0. | -5.012117 | 0.544591  | 0.439561  |
| 36. | 1. | 0. | -0.209624 | -1.614155 | 1.096947  |
| 37. | 1. | 0. | -0.400394 | 1.293724  | -1.177580 |
| 38. | 1. | 0. | 4.328049  | -1.763258 | 1.604271  |
| 39. | 1. | 0. | 4.584192  | -3.130304 | 0.507497  |
| 40. | 1. | 0. | 6.163533  | -0.928846 | 0.150742  |
| 41. | 1. | 0. | 5.373723  | -1.613041 | -1.284398 |
| 42. | 1. | 0. | 4.519654  | 0.629302  | -1.428367 |
| 43. | 1. | 0. | -4.179217 | 2.441859  | 2.066671  |
| 44. | 1. | 0. | -3.103909 | 4.125385  | -1.122517 |
| 45. | 1. | 0. | -2.146515 | 2.783955  | -1.769625 |
| 46. | 1. | 0. | -3.908492 | 2.690296  | -1.793158 |
| 47. | 1. | 0. | -6.144347 | 3.615147  | 1.305951  |
| 48. | 1. | 0. | -5.473769 | 3.726543  | -0.409706 |
| 49. | 1. | 0. | -1.723434 | 2.421480  | 1.962072  |
| 50. | 1. | 0. | -0.851966 | 2.710468  | 0.453127  |
| 51. | 1. | 0. | -1.882024 | 3.979886  | 1.131972  |
| 52. | 1. | 0. | 4.423583  | 2.922186  | 1.207040  |
| 53. | 1. | 0. | 3.909840  | 2.638146  | -0.462125 |
| 54. | 1. | 0. | 6.825721  | 2.586862  | 0.551306  |
| 55. | 1. | 0. | 6.339786  | 2.348582  | -1.137213 |
| 56. | 1. | 0. | 6.091326  | 3.920072  | -0.364793 |

| 1-11          |             | Standard Orientation<br>(Ångstroms) |           |           |           |
|---------------|-------------|-------------------------------------|-----------|-----------|-----------|
| Center number | Atom number | Type                                | X         | Y         | Z         |
| 1.            | 6.          | 0.                                  | -4.827941 | 2.154402  | -0.425334 |
| 2.            | 6.          | 0.                                  | -3.942167 | 1.082638  | -0.286048 |
| 3.            | 6.          | 0.                                  | -2.596855 | 1.243045  | 0.135264  |
| 4.            | 6.          | 0.                                  | -2.155132 | 2.537696  | 0.469771  |
| 5.            | 6.          | 0.                                  | -3.029678 | 3.608747  | 0.333180  |
| 6.            | 6.          | 0.                                  | -4.351268 | 3.422789  | -0.117304 |
| 7.            | 7.          | 0.                                  | -4.151877 | -0.267402 | -0.473251 |
| 8.            | 6.          | 0.                                  | -3.007518 | -0.981946 | -0.186967 |
| 9.            | 6.          | 0.                                  | -2.004708 | -0.082944 | 0.181446  |
| 10.           | 6.          | 0.                                  | -2.968557 | -2.495704 | -0.340745 |

|     |    |    |           |           |           |
|-----|----|----|-----------|-----------|-----------|
| 11. | 7. | 0. | 0.605018  | 1.308665  | -0.541675 |
| 12. | 6. | 0. | 0.506974  | 0.180134  | 0.298928  |
| 13. | 6. | 0. | -0.654080 | -0.459552 | 0.569715  |
| 14. | 6. | 0. | 1.703065  | 2.123563  | -0.671541 |
| 15. | 6. | 0. | 2.783355  | 1.809742  | 0.350805  |
| 16. | 7. | 0. | 2.893043  | 0.361019  | 0.580231  |
| 17. | 6. | 0. | 1.794336  | -0.429574 | 0.779212  |
| 18. | 6. | 0. | 4.214897  | 2.220734  | 0.011935  |
| 19. | 6. | 0. | 5.027666  | 1.270006  | 0.910216  |
| 20. | 6. | 0. | 4.286012  | -0.069664 | 0.790474  |
| 21. | 8. | 0. | 1.853513  | -1.561822 | 1.255554  |
| 22. | 8. | 0. | 1.769732  | 3.036238  | -1.479341 |
| 23. | 6. | 0. | -2.750771 | -3.207026 | 0.992497  |
| 24. | 6. | 0. | -1.831215 | -2.893864 | -1.319070 |
| 25. | 6. | 0. | -2.853462 | -2.693562 | 2.217071  |
| 26. | 6. | 0. | -4.300206 | -3.034982 | -0.923506 |
| 27. | 8. | 0. | 4.831210  | -0.745865 | -0.319455 |
| 28. | 6. | 0. | 4.429182  | -2.107009 | -0.498809 |
| 29. | 6. | 0. | 5.346611  | -2.722655 | -1.541450 |
| 30. | 1. | 0. | 2.474576  | 2.308566  | 1.286829  |
| 31. | 1. | 0. | -5.852156 | 2.000716  | -0.753142 |
| 32. | 1. | 0. | -1.148666 | 2.699979  | 0.838315  |
| 33. | 1. | 0. | -2.689815 | 4.609198  | 0.583037  |
| 34. | 1. | 0. | -5.009813 | 4.280340  | -0.215182 |
| 35. | 1. | 0. | -5.017110 | -0.677284 | -0.782797 |
| 36. | 1. | 0. | -0.182496 | 1.530827  | -1.139318 |
| 37. | 1. | 0. | -0.525421 | -1.390941 | 1.112236  |
| 38. | 1. | 0. | 4.418400  | 2.025411  | -1.044152 |
| 39. | 1. | 0. | 4.397003  | 3.278510  | 0.208469  |
| 40. | 1. | 0. | 6.069292  | 1.157585  | 0.606576  |
| 41. | 1. | 0. | 5.002073  | 1.613359  | 1.950756  |
| 42. | 1. | 0. | 4.333358  | -0.705061 | 1.683289  |
| 43. | 1. | 0. | -2.525587 | -4.268698 | 0.883188  |
| 44. | 1. | 0. | -1.813217 | -3.981326 | -1.450039 |
| 45. | 1. | 0. | -1.991557 | -2.434858 | -2.299621 |
| 46. | 1. | 0. | -0.853486 | -2.579416 | -0.950420 |
| 47. | 1. | 0. | -2.708312 | -3.314636 | 3.095523  |
| 48. | 1. | 0. | -3.069300 | -1.643183 | 2.387491  |
| 49. | 1. | 0. | -5.149043 | -2.813981 | -0.267981 |
| 50. | 1. | 0. | -4.495024 | -2.627840 | -1.922466 |
| 51. | 1. | 0. | -4.245174 | -4.122831 | -1.019667 |
| 52. | 1. | 0. | 3.382112  | -2.158662 | -0.820206 |

|     |    |    |          |           |           |
|-----|----|----|----------|-----------|-----------|
| 53. | 1. | 0. | 4.497409 | -2.644236 | 0.457879  |
| 54. | 1. | 0. | 5.274698 | -2.177661 | -2.487372 |
| 55. | 1. | 0. | 6.388240 | -2.692484 | -1.208462 |
| 56. | 1. | 0. | 5.068832 | -3.765857 | -1.722403 |

| <b>1-12</b>   |             | Standard Orientation<br>(Ångstroms) |           |           |           |
|---------------|-------------|-------------------------------------|-----------|-----------|-----------|
| Center number | Atom number | Type                                | X         | Y         | Z         |
| 1.            | 6.          | 0.                                  | -4.387672 | 2.626624  | -0.751606 |
| 2.            | 6.          | 0.                                  | -3.685214 | 1.445670  | -0.497304 |
| 3.            | 6.          | 0.                                  | -2.277335 | 1.342075  | -0.649179 |
| 4.            | 6.          | 0.                                  | -1.571173 | 2.464273  | -1.124571 |
| 5.            | 6.          | 0.                                  | -2.264399 | 3.642257  | -1.377410 |
| 6.            | 6.          | 0.                                  | -3.657136 | 3.726923  | -1.185305 |
| 7.            | 7.          | 0.                                  | -4.139897 | 0.206354  | -0.104856 |
| 8.            | 6.          | 0.                                  | -3.091158 | -0.684062 | 0.004741  |
| 9.            | 6.          | 0.                                  | -1.908653 | -0.021312 | -0.313515 |
| 10.           | 6.          | 0.                                  | -3.378049 | -2.137315 | 0.380626  |
| 11.           | 7.          | 0.                                  | 0.628253  | 1.134889  | 0.849813  |
| 12.           | 6.          | 0.                                  | 0.571212  | -0.075625 | 0.132693  |
| 13.           | 6.          | 0.                                  | -0.568548 | -0.600273 | -0.369903 |
| 14.           | 6.          | 0.                                  | 1.700822  | 1.609358  | 1.561576  |
| 15.           | 6.          | 0.                                  | 2.845586  | 0.619254  | 1.692229  |
| 16.           | 7.          | 0.                                  | 2.943452  | -0.296900 | 0.550367  |
| 17.           | 6.          | 0.                                  | 1.868525  | -0.784239 | -0.133544 |
| 18.           | 6.          | 0.                                  | 4.254239  | 1.209751  | 1.784561  |
| 19.           | 6.          | 0.                                  | 5.118933  | 0.004551  | 1.376945  |
| 20.           | 6.          | 0.                                  | 4.337184  | -0.652258 | 0.223684  |
| 21.           | 8.          | 0.                                  | 1.951897  | -1.707415 | -0.943705 |
| 22.           | 8.          | 0.                                  | 1.703147  | 2.698981  | 2.112994  |
| 23.           | 6.          | 0.                                  | -4.721462 | -2.203253 | 1.098449  |
| 24.           | 6.          | 0.                                  | -2.321044 | -2.675351 | 1.378045  |
| 25.           | 6.          | 0.                                  | -5.850034 | -2.762811 | 0.659351  |
| 26.           | 6.          | 0.                                  | -3.361097 | -2.997365 | -0.903436 |
| 27.           | 8.          | 0.                                  | 4.732393  | -0.083772 | -1.003711 |
| 28.           | 6.          | 0.                                  | 4.848112  | -0.987157 | -2.115530 |
| 29.           | 6.          | 0.                                  | 6.228019  | -1.632684 | -2.180853 |
| 30.           | 1.          | 0.                                  | 2.636708  | 0.044493  | 2.612233  |
| 31.           | 1.          | 0.                                  | -5.465136 | 2.679836  | -0.624588 |
| 32.           | 1.          | 0.                                  | -0.503811 | 2.409370  | -1.314522 |
| 33.           | 1.          | 0.                                  | -1.723909 | 4.511871  | -1.738519 |



|     |    |    |           |           |           |
|-----|----|----|-----------|-----------|-----------|
| 34. | 1. | 0. | -4.169961 | 4.661413  | -1.391228 |
| 35. | 1. | 0. | -5.098357 | -0.047004 | 0.081184  |
| 36. | 1. | 0. | -0.187670 | 1.736407  | 0.845425  |
| 37. | 1. | 0. | -0.423261 | -1.543103 | -0.889183 |
| 38. | 1. | 0. | 4.361287  | 2.026099  | 1.064626  |
| 39. | 1. | 0. | 4.473538  | 1.597570  | 2.780283  |
| 40. | 1. | 0. | 6.123386  | 0.272740  | 1.047061  |
| 41. | 1. | 0. | 5.203720  | -0.698922 | 2.213735  |
| 42. | 1. | 0. | 4.438994  | -1.742396 | 0.190625  |
| 43. | 1. | 0. | -4.721670 | -1.738007 | 2.085296  |
| 44. | 1. | 0. | -2.576090 | -3.700291 | 1.664979  |
| 45. | 1. | 0. | -1.320621 | -2.679896 | 0.942606  |
| 46. | 1. | 0. | -2.289426 | -2.062738 | 2.284239  |
| 47. | 1. | 0. | -6.746057 | -2.768478 | 1.273016  |
| 48. | 1. | 0. | -5.925054 | -3.248647 | -0.308443 |
| 49. | 1. | 0. | -4.093594 | -2.641781 | -1.633774 |
| 50. | 1. | 0. | -2.376383 | -2.954703 | -1.375616 |
| 51. | 1. | 0. | -3.582008 | -4.043950 | -0.670293 |
| 52. | 1. | 0. | 4.676004  | -0.371611 | -3.004346 |
| 53. | 1. | 0. | 4.050479  | -1.734832 | -2.067727 |
| 54. | 1. | 0. | 6.415193  | -2.269114 | -1.308994 |
| 55. | 1. | 0. | 6.312936  | -2.260391 | -3.074885 |
| 56. | 1. | 0. | 7.010693  | -0.868870 | -2.219541 |

**Table S4.** Energies of conformers of **4b** with Boltzmann distribution over 1% at MMFF.

| Label | E (kcal/mol) | rel. E (kcal/mol) | Boltzmann Dist |
|-------|--------------|-------------------|----------------|
| M0001 | 89.86        | 0.00              | 0.245          |
| M0002 | 90.21        | 0.35              | 0.136          |
| M0003 | 90.21        | 0.35              | 0.135          |
| M0004 | 90.25        | 0.39              | 0.127          |
| M0005 | 90.57        | 0.70              | 0.075          |
| M0006 | 90.61        | 0.75              | 0.069          |
| M0007 | 90.83        | 0.97              | 0.048          |
| M0008 | 90.90        | 1.04              | 0.042          |
| M0009 | 91.66        | 1.79              | 0.012          |
| M0010 | 91.68        | 1.82              | 0.011          |
| M0011 | 91.75        | 1.89              | 0.010          |

**Table S5.** Gibbs free energies<sup>a</sup> and equilibrium populations<sup>b</sup> of low-energy conformers of **4b**.

| Conformers | In MeOH  |              |
|------------|----------|--------------|
|            | <i>G</i> | <i>P</i> (%) |

|              |                  |       |
|--------------|------------------|-------|
| <b>4b-1</b>  | -804640.44611847 | 24.39 |
| <b>4b-2</b>  | -804639.2620071  | 3.30  |
| <b>4b-3</b>  | -804640.39466265 | 22.36 |
| <b>4b-4</b>  | -804639.30969786 | 3.58  |
| <b>4b-5</b>  | -804638.16637464 | 0.52  |
| <b>4b-6</b>  | -804638.93507439 | 1.90  |
| <b>4b-7</b>  | -804639.94034541 | 10.38 |
| <b>4b-8</b>  | -804639.26702718 | 3.33  |
| <b>4b-9</b>  | -804638.92001415 | 1.85  |
| <b>4b-10</b> | -804639.35236854 | 3.84  |
| <b>4b-11</b> | -804640.44988353 | 24.55 |

<sup>a</sup>B3LYP/6-31G(d,p), in kcal/mol. <sup>b</sup>From *G* values at 298.15K.

**Table S6** Cartesian coordinates for the low-energy reoptimized MMFF conformers of **4b** at B3LYP/6-31+G(d,p) level of theory in gas.

| <b>4b-1</b>   |               | Standard Orientation<br>(Ångstroms) |           |           |           |
|---------------|---------------|-------------------------------------|-----------|-----------|-----------|
| Center number | Atomic number | Atomic Type                         | X         | Y         | Z         |
| 1.            | 6.            | 0.                                  | 3.391808  | 3.286226  | 0.208876  |
| 2.            | 6.            | 0.                                  | 3.050587  | 1.935357  | 0.098611  |
| 3.            | 6.            | 0.                                  | 1.725155  | 1.495758  | -0.154510 |
| 4.            | 6.            | 0.                                  | 0.723707  | 2.465921  | -0.349546 |
| 5.            | 6.            | 0.                                  | 1.056765  | 3.810687  | -0.241802 |
| 6.            | 6.            | 0.                                  | 2.374858  | 4.218819  | 0.042581  |
| 7.            | 7.            | 0.                                  | 3.842269  | 0.809781  | 0.171997  |
| 8.            | 6.            | 0.                                  | 3.089363  | -0.328728 | -0.022081 |
| 9.            | 6.            | 0.                                  | 1.760946  | 0.044715  | -0.221910 |
| 10.           | 6.            | 0.                                  | 3.780648  | -1.692157 | -0.030678 |
| 11.           | 7.            | 0.                                  | -1.030545 | 0.133642  | 0.940125  |
| 12.           | 6.            | 0.                                  | -0.615578 | -0.776495 | -0.048232 |
| 13.           | 6.            | 0.                                  | 0.649054  | -0.848001 | -0.518715 |
| 14.           | 6.            | 0.                                  | -2.320059 | 0.350003  | 1.342105  |
| 15.           | 6.            | 0.                                  | -3.369775 | -0.320914 | 0.450743  |
| 16.           | 7.            | 0.                                  | -2.891543 | -1.586151 | -0.058903 |
| 17.           | 6.            | 0.                                  | -1.612700 | -1.802434 | -0.492481 |
| 18.           | 6.            | 0.                                  | -4.670572 | -0.725095 | 1.154748  |
| 19.           | 6.            | 0.                                  | -5.229455 | -1.809232 | 0.213846  |
| 20.           | 6.            | 0.                                  | -3.978012 | -2.541408 | -0.314519 |
| 21.           | 8.            | 0.                                  | -1.300157 | -2.795729 | -1.144250 |
| 22.           | 8.            | 0.                                  | -2.616327 | 1.078557  | 2.279977  |
| 23.           | 6.            | 0.                                  | 5.104946  | -1.574114 | 0.715651  |

|     |    |    |           |           |           |
|-----|----|----|-----------|-----------|-----------|
| 24. | 6. | 0. | 3.976974  | -2.142480 | -1.496249 |
| 25. | 6. | 0. | 6.335060  | -1.654775 | 0.205853  |
| 26. | 6. | 0. | 2.943767  | -2.752638 | 0.730418  |
| 27. | 8. | 0. | -3.591119 | 0.519951  | -0.697576 |
| 28. | 6. | 0. | -4.130967 | 1.829748  | -0.476521 |
| 29. | 6. | 0. | -4.112304 | 2.552432  | -1.813379 |
| 30. | 1. | 0. | 4.414124  | 3.595178  | 0.407070  |
| 31. | 1. | 0. | -0.291135 | 2.169861  | -0.592381 |
| 32. | 1. | 0. | 0.287800  | 4.563873  | -0.384953 |
| 33. | 1. | 0. | 2.602093  | 5.277523  | 0.122053  |
| 34. | 1. | 0. | 4.837506  | 0.789032  | 0.335636  |
| 35. | 1. | 0. | -0.320337 | 0.659046  | 1.437218  |
| 36. | 1. | 0. | 0.814232  | -1.690173 | -1.183370 |
| 37. | 1. | 0. | -4.423416 | -1.136169 | 2.138291  |
| 38. | 1. | 0. | -5.345836 | 0.116356  | 1.311571  |
| 39. | 1. | 0. | -5.921863 | -2.487197 | 0.718166  |
| 40. | 1. | 0. | -5.763974 | -1.338273 | -0.615536 |
| 41. | 1. | 0. | -3.772477 | -3.472825 | 0.224411  |
| 42. | 1. | 0. | -4.035587 | -2.784474 | -1.379066 |
| 43. | 1. | 0. | 4.997272  | -1.415556 | 1.789735  |
| 44. | 1. | 0. | 3.009885  | -2.247398 | -1.994054 |
| 45. | 1. | 0. | 4.564348  | -1.414844 | -2.063789 |
| 46. | 1. | 0. | 4.487476  | -3.110008 | -1.537441 |
| 47. | 1. | 0. | 6.521903  | -1.817274 | -0.851016 |
| 48. | 1. | 0. | 7.210168  | -1.578247 | 0.844462  |
| 49. | 1. | 0. | 2.757452  | -2.437823 | 1.761790  |
| 50. | 1. | 0. | 1.978211  | -2.930319 | 0.254614  |
| 51. | 1. | 0. | 3.491448  | -3.699913 | 0.755605  |
| 52. | 1. | 0. | -5.159530 | 1.761401  | -0.094783 |
| 53. | 1. | 0. | -3.541017 | 2.371900  | 0.272566  |
| 54. | 1. | 0. | -3.089284 | 2.643765  | -2.189252 |
| 55. | 1. | 0. | -4.534648 | 3.556514  | -1.706173 |
| 56. | 1. | 0. | -4.700533 | 2.005752  | -2.555974 |

| <b>4b-2</b>   |             | Standard Orientation<br>(Ångstroms) |           |          |           |
|---------------|-------------|-------------------------------------|-----------|----------|-----------|
| Center number | Atom number | Type                                | X         | Y        | Z         |
| 1.            | 6.          | 0.                                  | -4.105989 | 2.778042 | 0.599653  |
| 2.            | 6.          | 0.                                  | -3.449362 | 1.584867 | 0.286658  |
| 3.            | 6.          | 0.                                  | -2.147325 | 1.550444 | -0.278641 |
| 4.            | 6.          | 0.                                  | -1.516838 | 2.773273 | -0.580158 |

|     |    |    |           |           |           |
|-----|----|----|-----------|-----------|-----------|
| 5.  | 6. | 0. | -2.164369 | 3.963388  | -0.269576 |
| 6.  | 6. | 0. | -3.442341 | 3.967625  | 0.322399  |
| 7.  | 7. | 0. | -3.869764 | 0.279222  | 0.408474  |
| 8.  | 6. | 0. | -2.899232 | -0.589090 | -0.048256 |
| 9.  | 6. | 0. | -1.802697 | 0.154172  | -0.477729 |
| 10. | 6. | 0. | -3.177408 | -2.091698 | -0.046574 |
| 11. | 7. | 0. | 1.038804  | 0.941452  | 0.191577  |
| 12. | 6. | 0. | 0.693051  | 0.003105  | -0.796619 |
| 13. | 6. | 0. | -0.576528 | -0.363769 | -1.078291 |
| 14. | 6. | 0. | 2.303087  | 1.220453  | 0.633752  |
| 15. | 6. | 0. | 3.385599  | 0.270835  | 0.116734  |
| 16. | 7. | 0. | 3.067238  | -0.242650 | -1.194550 |
| 17. | 6. | 0. | 1.809033  | -0.582223 | -1.608625 |
| 18. | 6. | 0. | 4.766549  | 0.896593  | -0.109547 |
| 19. | 6. | 0. | 5.427136  | -0.112460 | -1.069051 |
| 20. | 6. | 0. | 4.267214  | -0.624420 | -1.951536 |
| 21. | 8. | 0. | 1.612481  | -1.262729 | -2.611806 |
| 22. | 8. | 0. | 2.541861  | 2.100349  | 1.451689  |
| 23. | 6. | 0. | -4.280205 | -2.385059 | 0.964357  |
| 24. | 6. | 0. | -1.932836 | -2.889294 | 0.419257  |
| 25. | 6. | 0. | -5.522144 | -2.803045 | 0.714429  |
| 26. | 6. | 0. | -3.566663 | -2.530379 | -1.476575 |
| 27. | 8. | 0. | 3.424030  | -0.870330 | 0.996360  |
| 28. | 6. | 0. | 3.877875  | -0.668210 | 2.342505  |
| 29. | 6. | 0. | 3.519553  | -1.918418 | 3.129171  |
| 30. | 1. | 0. | -5.101476 | 2.776076  | 1.034296  |
| 31. | 1. | 0. | -0.547536 | 2.792279  | -1.068183 |
| 32. | 1. | 0. | -1.680007 | 4.908592  | -0.494973 |
| 33. | 1. | 0. | -3.921880 | 4.913706  | 0.554030  |
| 34. | 1. | 0. | -4.758318 | -0.031190 | 0.771301  |
| 35. | 1. | 0. | 0.298651  | 1.479672  | 0.627858  |
| 36. | 1. | 0. | -0.647776 | -1.113871 | -1.860664 |
| 37. | 1. | 0. | 4.634291  | 1.873302  | -0.585220 |
| 38. | 1. | 0. | 5.317942  | 1.055363  | 0.817444  |
| 39. | 1. | 0. | 6.228390  | 0.335485  | -1.661217 |
| 40. | 1. | 0. | 5.854864  | -0.940620 | -0.497822 |
| 41. | 1. | 0. | 4.235890  | -0.144770 | -2.935530 |
| 42. | 1. | 0. | 4.295809  | -1.705350 | -2.114741 |
| 43. | 1. | 0. | -3.982199 | -2.234198 | 2.003007  |
| 44. | 1. | 0. | -1.086065 | -2.747706 | -0.253869 |
| 45. | 1. | 0. | -1.619505 | -2.578419 | 1.420535  |
| 46. | 1. | 0. | -2.172557 | -3.956746 | 0.450547  |

|     |    |    |           |           |           |
|-----|----|----|-----------|-----------|-----------|
| 47. | 1. | 0. | -5.889751 | -2.980155 | -0.291437 |
| 48. | 1. | 0. | -6.217702 | -3.002215 | 1.524375  |
| 49. | 1. | 0. | -4.441526 | -1.983285 | -1.839605 |
| 50. | 1. | 0. | -2.744822 | -2.337754 | -2.170799 |
| 51. | 1. | 0. | -3.790218 | -3.601655 | -1.503321 |
| 52. | 1. | 0. | 4.966016  | -0.510165 | 2.355387  |
| 53. | 1. | 0. | 3.408399  | 0.220638  | 2.779190  |
| 54. | 1. | 0. | 3.876304  | -1.831567 | 4.160357  |
| 55. | 1. | 0. | 3.976939  | -2.803470 | 2.677438  |
| 56. | 1. | 0. | 2.435961  | -2.064850 | 3.146764  |

| <b>4b-3</b>   |             | Standard Orientation<br>(Ångstroms) |           |           |           |
|---------------|-------------|-------------------------------------|-----------|-----------|-----------|
| Center number | Atom number | Type                                | X         | Y         | Z         |
| 1.            | 6.          | 0.                                  | 3.308144  | 3.291775  | 0.200467  |
| 2.            | 6.          | 0.                                  | 3.000406  | 1.936475  | 0.048572  |
| 3.            | 6.          | 0.                                  | 1.698270  | 1.479003  | -0.277967 |
| 4.            | 6.          | 0.                                  | 0.682620  | 2.430538  | -0.488044 |
| 5.            | 6.          | 0.                                  | 0.981254  | 3.778704  | -0.334114 |
| 6.            | 6.          | 0.                                  | 2.278577  | 4.206169  | 0.012361  |
| 7.            | 7.          | 0.                                  | 3.806775  | 0.823693  | 0.136267  |
| 8.            | 6.          | 0.                                  | 3.088555  | -0.324538 | -0.138187 |
| 9.            | 6.          | 0.                                  | 1.763272  | 0.030833  | -0.383163 |
| 10.           | 6.          | 0.                                  | 3.806721  | -1.664563 | 0.013708  |
| 11.           | 7.          | 0.                                  | -0.966444 | 0.062426  | 0.875564  |
| 12.           | 6.          | 0.                                  | -0.599719 | -0.796903 | -0.174777 |
| 13.           | 6.          | 0.                                  | 0.645041  | -0.852619 | -0.697419 |
| 14.           | 6.          | 0.                                  | -2.234550 | 0.262957  | 1.346676  |
| 15.           | 6.          | 0.                                  | -3.330648 | -0.358046 | 0.476555  |
| 16.           | 7.          | 0.                                  | -2.883575 | -1.586450 | -0.139538 |
| 17.           | 6.          | 0.                                  | -1.625992 | -1.785479 | -0.638197 |
| 18.           | 6.          | 0.                                  | -4.589368 | -0.811920 | 1.225196  |
| 19.           | 6.          | 0.                                  | -5.204343 | -1.828627 | 0.245073  |
| 20.           | 6.          | 0.                                  | -3.986746 | -2.520042 | -0.404253 |
| 21.           | 8.          | 0.                                  | -1.351340 | -2.739689 | -1.361075 |
| 22.           | 8.          | 0.                                  | -2.482466 | 0.948650  | 2.330201  |
| 23.           | 6.          | 0.                                  | 5.239157  | -1.483622 | -0.477719 |
| 24.           | 6.          | 0.                                  | 3.173594  | -2.778738 | -0.851752 |
| 25.           | 6.          | 0.                                  | 6.358923  | -1.554222 | 0.244352  |
| 26.           | 6.          | 0.                                  | 3.746226  | -2.089555 | 1.499495  |
| 27.           | 8.          | 0.                                  | -3.613586 | 0.556454  | -0.600664 |

|     |    |    |           |           |           |
|-----|----|----|-----------|-----------|-----------|
| 28. | 6. | 0. | -4.193013 | 1.825796  | -0.267749 |
| 29. | 6. | 0. | -4.170982 | 2.673852  | -1.528852 |
| 30. | 1. | 0. | 4.313512  | 3.617569  | 0.451236  |
| 31. | 1. | 0. | -0.315755 | 2.115964  | -0.773657 |
| 32. | 1. | 0. | 0.202524  | 4.519553  | -0.488238 |
| 33. | 1. | 0. | 2.479335  | 5.267128  | 0.126234  |
| 34. | 1. | 0. | 4.800448  | 0.819589  | 0.311249  |
| 35. | 1. | 0. | -0.233420 | 0.572958  | 1.354722  |
| 36. | 1. | 0. | 0.778950  | -1.650999 | -1.417719 |
| 37. | 1. | 0. | -4.284914 | -1.291315 | 2.160679  |
| 38. | 1. | 0. | -5.252319 | 0.014342  | 1.482684  |
| 39. | 1. | 0. | -5.867511 | -2.541558 | 0.740381  |
| 40. | 1. | 0. | -5.785646 | -1.302377 | -0.516921 |
| 41. | 1. | 0. | -3.755132 | -3.488247 | 0.052717  |
| 42. | 1. | 0. | -4.104650 | -2.684411 | -1.478857 |
| 43. | 1. | 0. | 5.318070  | -1.277273 | -1.545765 |
| 44. | 1. | 0. | 2.170137  | -3.036243 | -0.507561 |
| 45. | 1. | 0. | 3.112942  | -2.484537 | -1.903940 |
| 46. | 1. | 0. | 3.791726  | -3.679086 | -0.786848 |
| 47. | 1. | 0. | 6.356917  | -1.761161 | 1.309992  |
| 48. | 1. | 0. | 7.331857  | -1.424827 | -0.220373 |
| 49. | 1. | 0. | 4.194689  | -1.337134 | 2.154749  |
| 50. | 1. | 0. | 2.704979  | -2.220420 | 1.805250  |
| 51. | 1. | 0. | 4.270608  | -3.038493 | 1.651597  |
| 52. | 1. | 0. | -5.226903 | 1.693072  | 0.081695  |
| 53. | 1. | 0. | -3.632159 | 2.307739  | 0.541856  |
| 54. | 1. | 0. | -3.144253 | 2.835397  | -1.869427 |
| 55. | 1. | 0. | -4.630937 | 3.648279  | -1.336543 |
| 56. | 1. | 0. | -4.723650 | 2.182094  | -2.334520 |

| <b>4b-4</b>      |                | Standard Orientation<br>(Ångstroms) |           |           |           |
|------------------|----------------|-------------------------------------|-----------|-----------|-----------|
| Center<br>number | Atom<br>number | Type                                | X         | Y         | Z         |
| 1.               | 6.             | 0.                                  | -4.093065 | 2.688700  | 0.747880  |
| 2.               | 6.             | 0.                                  | -3.429973 | 1.534025  | 0.322639  |
| 3.               | 6.             | 0.                                  | -2.154945 | 1.569401  | -0.299679 |
| 4.               | 6.             | 0.                                  | -1.550135 | 2.820946  | -0.524099 |
| 5.               | 6.             | 0.                                  | -2.201623 | 3.971921  | -0.096861 |
| 6.               | 6.             | 0.                                  | -3.457624 | 3.907220  | 0.537897  |
| 7.               | 7.             | 0.                                  | -3.818431 | 0.214391  | 0.364792  |
| 8.               | 6.             | 0.                                  | -2.860069 | -0.595859 | -0.215933 |

|     |    |    |           |           |           |
|-----|----|----|-----------|-----------|-----------|
| 9.  | 6. | 0. | -1.795443 | 0.201256  | -0.626395 |
| 10. | 6. | 0. | -3.076726 | -2.106914 | -0.166873 |
| 11. | 7. | 0. | 0.991660  | 0.942692  | 0.227134  |
| 12. | 6. | 0. | 0.704085  | 0.123341  | -0.879033 |
| 13. | 6. | 0. | -0.545491 | -0.224699 | -1.256362 |
| 14. | 6. | 0. | 2.229518  | 1.163000  | 0.766210  |
| 15. | 6. | 0. | 3.336099  | 0.269086  | 0.202122  |
| 16. | 7. | 0. | 3.096954  | -0.065884 | -1.181937 |
| 17. | 6. | 0. | 1.864779  | -0.347481 | -1.704095 |
| 18. | 6. | 0. | 4.734313  | 0.894710  | 0.144904  |
| 19. | 6. | 0. | 5.444533  | 0.005239  | -0.893504 |
| 20. | 6. | 0. | 4.339656  | -0.359553 | -1.909422 |
| 21. | 8. | 0. | 1.725151  | -0.892313 | -2.795371 |
| 22. | 8. | 0. | 2.424730  | 1.944794  | 1.688441  |
| 23. | 6. | 0. | -4.567560 | -2.372487 | -0.347117 |
| 24. | 6. | 0. | -2.544708 | -2.636948 | 1.184770  |
| 25. | 6. | 0. | -5.412006 | -2.892243 | 0.545613  |
| 26. | 6. | 0. | -2.347712 | -2.841003 | -1.315863 |
| 27. | 8. | 0. | 3.307463  | -0.975865 | 0.928147  |
| 28. | 6. | 0. | 3.667675  | -0.952752 | 2.316729  |
| 29. | 6. | 0. | 3.226392  | -2.277231 | 2.917831  |
| 30. | 1. | 0. | -5.069505 | 2.636421  | 1.220798  |
| 31. | 1. | 0. | -0.597274 | 2.889943  | -1.039709 |
| 32. | 1. | 0. | -1.738994 | 4.940201  | -0.261805 |
| 33. | 1. | 0. | -3.941555 | 4.824127  | 0.860153  |
| 34. | 1. | 0. | -4.697727 | -0.138397 | 0.711467  |
| 35. | 1. | 0. | 0.227965  | 1.439611  | 0.672132  |
| 36. | 1. | 0. | -0.575902 | -0.862853 | -2.132663 |
| 37. | 1. | 0. | 4.641471  | 1.926268  | -0.208534 |
| 38. | 1. | 0. | 5.226899  | 0.923442  | 1.117146  |
| 39. | 1. | 0. | 6.291042  | 0.506983  | -1.367869 |
| 40. | 1. | 0. | 5.818907  | -0.900646 | -0.409375 |
| 41. | 1. | 0. | 4.376440  | 0.253086  | -2.816537 |
| 42. | 1. | 0. | 4.368446  | -1.407633 | -2.219955 |
| 43. | 1. | 0. | -4.950999 | -2.097064 | -1.330337 |
| 44. | 1. | 0. | -1.472920 | -2.437353 | 1.263578  |
| 45. | 1. | 0. | -3.038200 | -2.152352 | 2.032289  |
| 46. | 1. | 0. | -2.700380 | -3.717744 | 1.264620  |
| 47. | 1. | 0. | -5.100009 | -3.194213 | 1.540578  |
| 48. | 1. | 0. | -6.456950 | -3.053419 | 0.297690  |
| 49. | 1. | 0. | -2.635999 | -2.441685 | -2.293023 |
| 50. | 1. | 0. | -1.263539 | -2.761645 | -1.217510 |

|     |    |    |           |           |           |
|-----|----|----|-----------|-----------|-----------|
| 51. | 1. | 0. | -2.611383 | -3.902562 | -1.291094 |
| 52. | 1. | 0. | 4.755312  | -0.831306 | 2.422917  |
| 53. | 1. | 0. | 3.188254  | -0.109439 | 2.826936  |
| 54. | 1. | 0. | 3.513289  | -2.328391 | 3.972930  |
| 55. | 1. | 0. | 3.692558  | -3.114780 | 2.390782  |
| 56. | 1. | 0. | 2.140913  | -2.389955 | 2.846574  |

| <b>4b-5</b>   |             | Standard Orientation<br>(Ångstroms) |           |           |           |
|---------------|-------------|-------------------------------------|-----------|-----------|-----------|
| Center number | Atom number | Type                                | X         | Y         | Z         |
| 1.            | 6.          | 0.                                  | -4.387187 | 2.587074  | 0.574551  |
| 2.            | 6.          | 0.                                  | -3.668100 | 1.420344  | 0.303546  |
| 3.            | 6.          | 0.                                  | -2.385633 | 1.431435  | -0.304826 |
| 4.            | 6.          | 0.                                  | -1.845037 | 2.671035  | -0.699030 |
| 5.            | 6.          | 0.                                  | -2.554822 | 3.835882  | -0.431281 |
| 6.            | 6.          | 0.                                  | -3.809091 | 3.797101  | 0.207802  |
| 7.            | 7.          | 0.                                  | -4.007790 | 0.099976  | 0.508242  |
| 8.            | 6.          | 0.                                  | -2.999837 | -0.734115 | 0.063380  |
| 9.            | 6.          | 0.                                  | -1.962606 | 0.049546  | -0.435099 |
| 10.           | 6.          | 0.                                  | -3.141339 | -2.251527 | 0.138558  |
| 11.           | 7.          | 0.                                  | 0.845282  | 1.074872  | 0.083104  |
| 12.           | 6.          | 0.                                  | 0.533913  | 0.018658  | -0.792874 |
| 13.           | 6.          | 0.                                  | -0.715875 | -0.447919 | -1.006819 |
| 14.           | 6.          | 0.                                  | 2.098434  | 1.455004  | 0.477413  |
| 15.           | 6.          | 0.                                  | 3.218514  | 0.504574  | 0.049810  |
| 16.           | 7.          | 0.                                  | 2.913479  | -0.153887 | -1.197865 |
| 17.           | 6.          | 0.                                  | 1.668202  | -0.592162 | -1.557896 |
| 18.           | 6.          | 0.                                  | 4.569711  | 1.162198  | -0.254534 |
| 19.           | 6.          | 0.                                  | 5.265767  | 0.089572  | -1.114800 |
| 20.           | 6.          | 0.                                  | 4.122611  | -0.554596 | -1.929567 |
| 21.           | 8.          | 0.                                  | 1.497345  | -1.378136 | -2.485808 |
| 22.           | 8.          | 0.                                  | 2.303691  | 2.426804  | 1.194836  |
| 23.           | 6.          | 0.                                  | -1.861106 | -2.844725 | 0.714478  |
| 24.           | 6.          | 0.                                  | -3.472697 | -2.798510 | -1.269063 |
| 25.           | 6.          | 0.                                  | -1.136728 | -3.841086 | 0.208025  |
| 26.           | 6.          | 0.                                  | -4.290148 | -2.651686 | 1.100802  |
| 27.           | 8.          | 0.                                  | 3.314437  | -0.536975 | 1.042128  |
| 28.           | 6.          | 0.                                  | 3.746770  | -0.174355 | 2.360711  |
| 29.           | 6.          | 0.                                  | 3.482987  | -1.368792 | 3.262990  |
| 30.           | 1.          | 0.                                  | -5.365799 | 2.550168  | 1.044799  |
| 31.           | 1.          | 0.                                  | -0.898063 | 2.720931  | -1.227009 |



|     |    |    |           |           |           |
|-----|----|----|-----------|-----------|-----------|
| 32. | 1. | 0. | -2.139268 | 4.793750  | -0.728820 |
| 33. | 1. | 0. | -4.338950 | 4.724010  | 0.404512  |
| 34. | 1. | 0. | -4.852077 | -0.214016 | 0.956663  |
| 35. | 1. | 0. | 0.086057  | 1.618600  | 0.477315  |
| 36. | 1. | 0. | -0.751372 | -1.293398 | -1.685042 |
| 37. | 1. | 0. | 4.391974  | 2.078876  | -0.825345 |
| 38. | 1. | 0. | 5.120741  | 1.437086  | 0.645122  |
| 39. | 1. | 0. | 6.044810  | 0.507452  | -1.756595 |
| 40. | 1. | 0. | 5.730139  | -0.659100 | -0.467428 |
| 41. | 1. | 0. | 4.062792  | -0.173750 | -2.954728 |
| 42. | 1. | 0. | 4.197468  | -1.643986 | -1.988928 |
| 43. | 1. | 0. | -1.556292 | -2.401398 | 1.662231  |
| 44. | 1. | 0. | -4.391068 | -2.337936 | -1.644810 |
| 45. | 1. | 0. | -2.674112 | -2.587148 | -1.983926 |
| 46. | 1. | 0. | -3.625921 | -3.881961 | -1.237103 |
| 47. | 1. | 0. | -1.372237 | -4.319320 | -0.737184 |
| 48. | 1. | 0. | -0.253220 | -4.203550 | 0.723802  |
| 49. | 1. | 0. | -4.128935 | -2.262284 | 2.111418  |
| 50. | 1. | 0. | -5.264692 | -2.302760 | 0.738174  |
| 51. | 1. | 0. | -4.342057 | -3.741012 | 1.168364  |
| 52. | 1. | 0. | 4.819279  | 0.068110  | 2.355616  |
| 53. | 1. | 0. | 3.209379  | 0.713029  | 2.714479  |
| 54. | 1. | 0. | 2.413914  | -1.596632 | 3.297000  |
| 55. | 1. | 0. | 3.826796  | -1.157501 | 4.280499  |
| 56. | 1. | 0. | 4.009922  | -2.254242 | 2.895658  |

| <b>4b-6</b>   |             | Standard Orientation<br>(Ångstroms) |           |           |           |
|---------------|-------------|-------------------------------------|-----------|-----------|-----------|
| Center number | Atom number | Type                                | X         | Y         | Z         |
| 1.            | 6.          | 0.                                  | 3.547886  | 3.334506  | 0.268222  |
| 2.            | 6.          | 0.                                  | 3.195144  | 1.989576  | 0.129369  |
| 3.            | 6.          | 0.                                  | 1.867050  | 1.564595  | -0.131999 |
| 4.            | 6.          | 0.                                  | 0.874874  | 2.547795  | -0.310401 |
| 5.            | 6.          | 0.                                  | 1.218711  | 3.887401  | -0.175096 |
| 6.            | 6.          | 0.                                  | 2.539035  | 4.279079  | 0.120695  |
| 7.            | 7.          | 0.                                  | 3.982448  | 0.857776  | 0.174493  |
| 8.            | 6.          | 0.                                  | 3.220561  | -0.272383 | -0.044259 |
| 9.            | 6.          | 0.                                  | 1.893478  | 0.114930  | -0.224873 |
| 10.           | 6.          | 0.                                  | 3.860690  | -1.657458 | -0.085120 |
| 11.           | 7.          | 0.                                  | -0.907824 | 0.240757  | 0.924586  |
| 12.           | 6.          | 0.                                  | -0.487952 | -0.693263 | -0.040990 |

|     |    |    |           |           |           |
|-----|----|----|-----------|-----------|-----------|
| 13. | 6. | 0. | 0.779908  | -0.781092 | -0.500908 |
| 14. | 6. | 0. | -2.197729 | 0.466943  | 1.318018  |
| 15. | 6. | 0. | -3.244629 | -0.220561 | 0.436875  |
| 16. | 7. | 0. | -2.766211 | -1.497667 | -0.039952 |
| 17. | 6. | 0. | -1.486239 | -1.723621 | -0.470242 |
| 18. | 6. | 0. | -4.550622 | -0.605247 | 1.141831  |
| 19. | 6. | 0. | -5.107216 | -1.707294 | 0.220378  |
| 20. | 6. | 0. | -3.854763 | -2.452149 | -0.288290 |
| 21. | 8. | 0. | -1.179747 | -2.725741 | -1.110628 |
| 22. | 8. | 0. | -2.495842 | 1.213001  | 2.242007  |
| 23. | 6. | 0. | 3.041988  | -2.613828 | 0.774206  |
| 24. | 6. | 0. | 5.287164  | -1.623891 | 0.522979  |
| 25. | 6. | 0. | 2.558384  | -3.802557 | 0.417948  |
| 26. | 6. | 0. | 3.971104  | -2.120668 | -1.556093 |
| 27. | 8. | 0. | -3.458113 | 0.594846  | -0.731960 |
| 28. | 6. | 0. | -3.998052 | 1.909213  | -0.542570 |
| 29. | 6. | 0. | -3.957003 | 2.608842  | -1.891191 |
| 30. | 1. | 0. | 4.572636  | 3.630981  | 0.473501  |
| 31. | 1. | 0. | -0.141587 | 2.266105  | -0.562324 |
| 32. | 1. | 0. | 0.456212  | 4.649364  | -0.305515 |
| 33. | 1. | 0. | 2.774893  | 5.333919  | 0.222779  |
| 34. | 1. | 0. | 4.968436  | 0.851261  | 0.375236  |
| 35. | 1. | 0. | -0.199420 | 0.766582  | 1.423389  |
| 36. | 1. | 0. | 0.953370  | -1.654145 | -1.119563 |
| 37. | 1. | 0. | -4.310276 | -0.996149 | 2.135187  |
| 38. | 1. | 0. | -5.223993 | 0.241514  | 1.276824  |
| 39. | 1. | 0. | -5.803143 | -2.373755 | 0.735174  |
| 40. | 1. | 0. | -5.637438 | -1.252083 | -0.620479 |
| 41. | 1. | 0. | -3.656776 | -3.376357 | 0.265686  |
| 42. | 1. | 0. | -3.906638 | -2.711184 | -1.349429 |
| 43. | 1. | 0. | 2.884962  | -2.265842 | 1.795151  |
| 44. | 1. | 0. | 5.964901  | -0.991671 | -0.063471 |
| 45. | 1. | 0. | 5.279769  | -1.268734 | 1.558732  |
| 46. | 1. | 0. | 5.704563  | -2.633687 | 0.520621  |
| 47. | 1. | 0. | 2.663223  | -4.204913 | -0.584342 |
| 48. | 1. | 0. | 2.010307  | -4.415228 | 1.126544  |
| 49. | 1. | 0. | 2.990596  | -2.204422 | -2.030151 |
| 50. | 1. | 0. | 4.562584  | -1.403112 | -2.132231 |
| 51. | 1. | 0. | 4.466167  | -3.095041 | -1.617759 |
| 52. | 1. | 0. | -5.032743 | 1.849768  | -0.176052 |
| 53. | 1. | 0. | -3.418853 | 2.463306  | 0.206261  |
| 54. | 1. | 0. | -4.379472 | 3.615197  | -1.808238 |

|     |    |    |           |          |           |
|-----|----|----|-----------|----------|-----------|
| 55. | 1. | 0. | -4.534200 | 2.050058 | -2.633451 |
| 56. | 1. | 0. | -2.927973 | 2.692146 | -2.252264 |

| <b>4b-7</b>   |             | Standard Orientation<br>(Ångstroms) |           |           |           |
|---------------|-------------|-------------------------------------|-----------|-----------|-----------|
| Center number | Atom number | Type                                | X         | Y         | Z         |
| 1.            | 6.          | 0.                                  | -3.552046 | 3.339143  | -0.187012 |
| 2.            | 6.          | 0.                                  | -3.192222 | 1.990525  | -0.121661 |
| 3.            | 6.          | 0.                                  | -1.867018 | 1.559223  | 0.144612  |
| 4.            | 6.          | 0.                                  | -0.885691 | 2.536221  | 0.400561  |
| 5.            | 6.          | 0.                                  | -1.236481 | 3.879268  | 0.337208  |
| 6.            | 6.          | 0.                                  | -2.553603 | 4.279475  | 0.038171  |
| 7.            | 7.          | 0.                                  | -3.969563 | 0.858399  | -0.253835 |
| 8.            | 6.          | 0.                                  | -3.204994 | -0.277614 | -0.082258 |
| 9.            | 6.          | 0.                                  | -1.884967 | 0.107291  | 0.153753  |
| 10.           | 6.          | 0.                                  | -3.819670 | -1.672572 | -0.173324 |
| 11.           | 7.          | 0.                                  | 0.933238  | 0.301621  | -0.941505 |
| 12.           | 6.          | 0.                                  | 0.497207  | -0.694467 | -0.047440 |
| 13.           | 6.          | 0.                                  | -0.776244 | -0.803967 | 0.393454  |
| 14.           | 6.          | 0.                                  | 2.229454  | 0.548112  | -1.301623 |
| 15.           | 6.          | 0.                                  | 3.261838  | -0.203265 | -0.455359 |
| 16.           | 7.          | 0.                                  | 2.772040  | -1.509083 | -0.076762 |
| 17.           | 6.          | 0.                                  | 1.484750  | -1.761234 | 0.313948  |
| 18.           | 6.          | 0.                                  | 4.576777  | -0.542857 | -1.167588 |
| 19.           | 6.          | 0.                                  | 5.113955  | -1.713081 | -0.321951 |
| 20.           | 6.          | 0.                                  | 3.850765  | -2.489462 | 0.104024  |
| 21.           | 8.          | 0.                                  | 1.162582  | -2.811510 | 0.863107  |
| 22.           | 8.          | 0.                                  | 2.542955  | 1.353993  | -2.168103 |
| 23.           | 6.          | 0.                                  | -3.676970 | -2.335657 | 1.193604  |
| 24.           | 6.          | 0.                                  | -3.136353 | -2.474584 | -1.301616 |
| 25.           | 6.          | 0.                                  | -3.064871 | -3.485808 | 1.474855  |
| 26.           | 6.          | 0.                                  | -5.334770 | -1.593148 | -0.484675 |
| 27.           | 8.          | 0.                                  | 3.464308  | 0.525699  | 0.770690  |
| 28.           | 6.          | 0.                                  | 3.973834  | 1.862139  | 0.679296  |
| 29.           | 6.          | 0.                                  | 3.996456  | 2.429763  | 2.088965  |
| 30.           | 1.          | 0.                                  | -4.574339 | 3.641065  | -0.396521 |
| 31.           | 1.          | 0.                                  | 0.127611  | 2.246107  | 0.655961  |
| 32.           | 1.          | 0.                                  | -0.482365 | 4.636972  | 0.527458  |
| 33.           | 1.          | 0.                                  | -2.795239 | 5.337020  | -0.005825 |
| 34.           | 1.          | 0.                                  | -4.954097 | 0.857755  | -0.461881 |
| 35.           | 1.          | 0.                                  | 0.233642  | 0.866080  | -1.409730 |

|     |    |    |           |           |           |
|-----|----|----|-----------|-----------|-----------|
| 36. | 1. | 0. | -0.971423 | -1.706304 | 0.964371  |
| 37. | 1. | 0. | 4.350535  | -0.857195 | -2.191042 |
| 38. | 1. | 0. | 5.256127  | 0.307723  | -1.228890 |
| 39. | 1. | 0. | 5.818961  | -2.341063 | -0.871595 |
| 40. | 1. | 0. | 5.627371  | -1.323516 | 0.561173  |
| 41. | 1. | 0. | 3.655736  | -3.361345 | -0.530186 |
| 42. | 1. | 0. | 3.885405  | -2.838729 | 1.139606  |
| 43. | 1. | 0. | -4.152378 | -1.780947 | 2.003102  |
| 44. | 1. | 0. | -3.277008 | -1.966615 | -2.260424 |
| 45. | 1. | 0. | -2.063124 | -2.580641 | -1.132035 |
| 46. | 1. | 0. | -3.575482 | -3.474231 | -1.379097 |
| 47. | 1. | 0. | -2.558211 | -4.082396 | 0.723411  |
| 48. | 1. | 0. | -3.038497 | -3.867558 | 2.490764  |
| 49. | 1. | 0. | -5.888239 | -1.061409 | 0.297475  |
| 50. | 1. | 0. | -5.522120 | -1.103917 | -1.447652 |
| 51. | 1. | 0. | -5.746375 | -2.603805 | -0.541980 |
| 52. | 1. | 0. | 4.986548  | 1.860046  | 0.252512  |
| 53. | 1. | 0. | 3.345552  | 2.473461  | 0.019532  |
| 54. | 1. | 0. | 2.988424  | 2.452040  | 2.512704  |
| 55. | 1. | 0. | 4.392551  | 3.450069  | 2.079027  |
| 56. | 1. | 0. | 4.626850  | 1.818671  | 2.741265  |

| <b>4b-8</b>   |             | Standard Orientation<br>(Ångstroms) |           |           |           |
|---------------|-------------|-------------------------------------|-----------|-----------|-----------|
| Center number | Atom number | Type                                | X         | Y         | Z         |
| 1.            | 6.          | 0.                                  | -4.323363 | 2.682265  | 0.435678  |
| 2.            | 6.          | 0.                                  | -3.616388 | 1.489834  | 0.262062  |
| 3.            | 6.          | 0.                                  | -2.347890 | 1.433904  | -0.372762 |
| 4.            | 6.          | 0.                                  | -1.808167 | 2.626788  | -0.892471 |
| 5.            | 6.          | 0.                                  | -2.505388 | 3.816999  | -0.720810 |
| 6.            | 6.          | 0.                                  | -3.746467 | 3.847778  | -0.055857 |
| 7.            | 7.          | 0.                                  | -3.957884 | 0.197323  | 0.599817  |
| 8.            | 6.          | 0.                                  | -2.966758 | -0.682825 | 0.210277  |
| 9.            | 6.          | 0.                                  | -1.936654 | 0.043106  | -0.383852 |
| 10.           | 6.          | 0.                                  | -3.087226 | -2.183030 | 0.465669  |
| 11.           | 7.          | 0.                                  | 0.884025  | 1.077393  | 0.008429  |
| 12.           | 6.          | 0.                                  | 0.553710  | -0.051590 | -0.763851 |
| 13.           | 6.          | 0.                                  | -0.704561 | -0.518763 | -0.925689 |
| 14.           | 6.          | 0.                                  | 2.144443  | 1.470403  | 0.366323  |
| 15.           | 6.          | 0.                                  | 3.244903  | 0.462053  | 0.030113  |
| 16.           | 7.          | 0.                                  | 2.928920  | -0.294586 | -1.157705 |

|     |    |    |           |           |           |
|-----|----|----|-----------|-----------|-----------|
| 17. | 6. | 0. | 1.676051  | -0.744146 | -1.476021 |
| 18. | 6. | 0. | 4.612081  | 1.059588  | -0.322587 |
| 19. | 6. | 0. | 5.285666  | -0.099242 | -1.082542 |
| 20. | 6. | 0. | 4.130918  | -0.783084 | -1.846863 |
| 21. | 8. | 0. | 1.490699  | -1.608011 | -2.328499 |
| 22. | 8. | 0. | 2.368511  | 2.501248  | 0.989017  |
| 23. | 6. | 0. | -3.093024 | -2.887801 | -0.887625 |
| 24. | 6. | 0. | -4.428225 | -2.523484 | 1.161262  |
| 25. | 6. | 0. | -2.250826 | -3.829571 | -1.312127 |
| 26. | 6. | 0. | -1.933903 | -2.650684 | 1.378539  |
| 27. | 8. | 0. | 3.312477  | -0.492009 | 1.109257  |
| 28. | 6. | 0. | 3.736603  | -0.024468 | 2.397133  |
| 29. | 6. | 0. | 3.467470  | -1.142990 | 3.390471  |
| 30. | 1. | 0. | -5.291768 | 2.697656  | 0.927761  |
| 31. | 1. | 0. | -0.872013 | 2.618776  | -1.441771 |
| 32. | 1. | 0. | -2.090623 | 4.739701  | -1.114923 |
| 33. | 1. | 0. | -4.266924 | 4.793073  | 0.063082  |
| 34. | 1. | 0. | -4.802025 | -0.068941 | 1.078371  |
| 35. | 1. | 0. | 0.134473  | 1.667863  | 0.350584  |
| 36. | 1. | 0. | -0.770055 | -1.421516 | -1.525378 |
| 37. | 1. | 0. | 4.457148  | 1.927204  | -0.971392 |
| 38. | 1. | 0. | 5.166314  | 1.399164  | 0.552663  |
| 39. | 1. | 0. | 6.077949  | 0.242407  | -1.752626 |
| 40. | 1. | 0. | 5.727777  | -0.800464 | -0.369752 |
| 41. | 1. | 0. | 4.084234  | -0.488040 | -2.900594 |
| 42. | 1. | 0. | 4.180054  | -1.875057 | -1.814359 |
| 43. | 1. | 0. | -3.898267 | -2.565565 | -1.548403 |
| 44. | 1. | 0. | -4.507637 | -2.036768 | 2.140337  |
| 45. | 1. | 0. | -5.291969 | -2.236939 | 0.550918  |
| 46. | 1. | 0. | -4.488926 | -3.602439 | 1.323313  |
| 47. | 1. | 0. | -1.419963 | -4.188351 | -0.713249 |
| 48. | 1. | 0. | -2.361084 | -4.271956 | -2.297290 |
| 49. | 1. | 0. | -0.958221 | -2.447137 | 0.932936  |
| 50. | 1. | 0. | -1.980307 | -2.127566 | 2.338339  |
| 51. | 1. | 0. | -2.010807 | -3.725210 | 1.572773  |
| 52. | 1. | 0. | 4.808882  | 0.218504  | 2.379731  |
| 53. | 1. | 0. | 3.196802  | 0.888008  | 2.675517  |
| 54. | 1. | 0. | 2.398534  | -1.369780 | 3.434481  |
| 55. | 1. | 0. | 3.802795  | -0.849612 | 4.390294  |
| 56. | 1. | 0. | 3.998679  | -2.053989 | 3.099823  |

|             |                      |
|-------------|----------------------|
| <b>4b-9</b> | Standard Orientation |
|-------------|----------------------|

|               |             | (Ångstroms) |           |           |           |
|---------------|-------------|-------------|-----------|-----------|-----------|
| Center number | Atom number | Type        | X         | Y         | Z         |
| 1.            | 6.          | 0.          | 3.374659  | 3.271324  | 0.315809  |
| 2.            | 6.          | 0.          | 3.030243  | 1.925023  | 0.166425  |
| 3.            | 6.          | 0.          | 1.705431  | 1.496901  | -0.108147 |
| 4.            | 6.          | 0.          | 0.708440  | 2.474856  | -0.285111 |
| 5.            | 6.          | 0.          | 1.044730  | 3.815172  | -0.138940 |
| 6.            | 6.          | 0.          | 2.361761  | 4.211233  | 0.166847  |
| 7.            | 7.          | 0.          | 3.817971  | 0.795190  | 0.214793  |
| 8.            | 6.          | 0.          | 3.063130  | -0.335015 | -0.016243 |
| 9.            | 6.          | 0.          | 1.737254  | 0.048308  | -0.215058 |
| 10.           | 6.          | 0.          | 3.749514  | -1.700389 | -0.056962 |
| 11.           | 7.          | 0.          | -1.069406 | 0.114520  | 0.920791  |
| 12.           | 6.          | 0.          | -0.644399 | -0.768557 | -0.088660 |
| 13.           | 6.          | 0.          | 0.625764  | -0.832336 | -0.545146 |
| 14.           | 6.          | 0.          | -2.365480 | 0.334626  | 1.300318  |
| 15.           | 6.          | 0.          | -3.394053 | -0.280122 | 0.336467  |
| 16.           | 7.          | 0.          | -2.920705 | -1.558741 | -0.147283 |
| 17.           | 6.          | 0.          | -1.636689 | -1.785035 | -0.564219 |
| 18.           | 6.          | 0.          | -4.771964 | -0.601457 | 0.966605  |
| 19.           | 6.          | 0.          | -4.937306 | -2.132991 | 0.839545  |
| 20.           | 6.          | 0.          | -4.013052 | -2.511930 | -0.326196 |
| 21.           | 8.          | 0.          | -1.314539 | -2.777357 | -1.212040 |
| 22.           | 8.          | 0.          | -2.672217 | 1.020790  | 2.265536  |
| 23.           | 6.          | 0.          | 5.071812  | -1.606537 | 0.696339  |
| 24.           | 6.          | 0.          | 3.949267  | -2.115003 | -1.532633 |
| 25.           | 6.          | 0.          | 6.303170  | -1.678168 | 0.188226  |
| 26.           | 6.          | 0.          | 2.906159  | -2.776376 | 0.674868  |
| 27.           | 8.          | 0.          | -3.492293 | 0.582454  | -0.810573 |
| 28.           | 6.          | 0.          | -3.917640 | 1.930549  | -0.579277 |
| 29.           | 6.          | 0.          | -4.041592 | 2.601233  | -1.937105 |
| 30.           | 1.          | 0.          | 4.396344  | 3.571640  | 0.529924  |
| 31.           | 1.          | 0.          | -0.304715 | 2.187462  | -0.544525 |
| 32.           | 1.          | 0.          | 0.279369  | 4.574545  | -0.268126 |
| 33.           | 1.          | 0.          | 2.591555  | 5.266688  | 0.276480  |
| 34.           | 1.          | 0.          | 4.812083  | 0.766892  | 0.384066  |
| 35.           | 1.          | 0.          | -0.362838 | 0.603298  | 1.458513  |
| 36.           | 1.          | 0.          | 0.797111  | -1.660275 | -1.225876 |
| 37.           | 1.          | 0.          | -4.825026 | -0.241180 | 1.995133  |
| 38.           | 1.          | 0.          | -5.539728 | -0.084223 | 0.385488  |
| 39.           | 1.          | 0.          | -4.594486 | -2.630142 | 1.752594  |

|     |    |    |           |           |           |
|-----|----|----|-----------|-----------|-----------|
| 40. | 1. | 0. | -5.975348 | -2.428649 | 0.666607  |
| 41. | 1. | 0. | -3.619866 | -3.528827 | -0.288291 |
| 42. | 1. | 0. | -4.500057 | -2.368172 | -1.299763 |
| 43. | 1. | 0. | 4.961223  | -1.475900 | 1.773873  |
| 44. | 1. | 0. | 2.983813  | -2.203711 | -2.036671 |
| 45. | 1. | 0. | 4.541725  | -1.375961 | -2.079752 |
| 46. | 1. | 0. | 4.456117  | -3.083243 | -1.595748 |
| 47. | 1. | 0. | 6.492508  | -1.813521 | -0.872003 |
| 48. | 1. | 0. | 7.176672  | -1.621710 | 0.831104  |
| 49. | 1. | 0. | 2.718780  | -2.487216 | 1.713553  |
| 50. | 1. | 0. | 1.940984  | -2.937912 | 0.192570  |
| 51. | 1. | 0. | 3.449939  | -3.726216 | 0.677292  |
| 52. | 1. | 0. | -4.881372 | 1.945993  | -0.051047 |
| 53. | 1. | 0. | -3.195046 | 2.461470  | 0.054595  |
| 54. | 1. | 0. | -4.356448 | 3.642628  | -1.817437 |
| 55. | 1. | 0. | -4.778418 | 2.083920  | -2.558127 |
| 56. | 1. | 0. | -3.082441 | 2.586582  | -2.462442 |

| <b>4b-10</b>  |             | Standard Orientation<br>(Ångstroms) |           |           |           |
|---------------|-------------|-------------------------------------|-----------|-----------|-----------|
| Center number | Atom number | Type                                | X         | Y         | Z         |
| 1.            | 6.          | 0.                                  | -3.572590 | 3.225146  | -0.269759 |
| 2.            | 6.          | 0.                                  | -3.197472 | 1.881062  | -0.193709 |
| 3.            | 6.          | 0.                                  | -1.869304 | 1.466793  | 0.084225  |
| 4.            | 6.          | 0.                                  | -0.900951 | 2.456773  | 0.340596  |
| 5.            | 6.          | 0.                                  | -1.266926 | 3.795110  | 0.266056  |
| 6.            | 6.          | 0.                                  | -2.586666 | 4.178232  | -0.044253 |
| 7.            | 7.          | 0.                                  | -3.960148 | 0.739560  | -0.323122 |
| 8.            | 6.          | 0.                                  | -3.185391 | -0.387256 | -0.137396 |
| 9.            | 6.          | 0.                                  | -1.870896 | 0.014622  | 0.102190  |
| 10.           | 6.          | 0.                                  | -3.785283 | -1.780897 | -0.251674 |
| 11.           | 7.          | 0.                                  | 0.954825  | 0.238814  | -0.964238 |
| 12.           | 6.          | 0.                                  | 0.525606  | -0.751871 | -0.061818 |
| 13.           | 6.          | 0.                                  | -0.751359 | -0.878466 | 0.364112  |
| 14.           | 6.          | 0.                                  | 2.251226  | 0.510053  | -1.305456 |
| 15.           | 6.          | 0.                                  | 3.287136  | -0.210490 | -0.438050 |
| 16.           | 7.          | 0.                                  | 2.817536  | -1.517674 | -0.040657 |
| 17.           | 6.          | 0.                                  | 1.529755  | -1.790855 | 0.333721  |
| 18.           | 6.          | 0.                                  | 4.614000  | -0.539780 | -1.131936 |
| 19.           | 6.          | 0.                                  | 5.166562  | -1.679639 | -0.255410 |
| 20.           | 6.          | 0.                                  | 3.914365  | -2.469733 | 0.179621  |

|     |    |    |           |           |           |
|-----|----|----|-----------|-----------|-----------|
| 21. | 8. | 0. | 1.221301  | -2.836940 | 0.897978  |
| 22. | 8. | 0. | 2.560323  | 1.316527  | -2.173492 |
| 23. | 6. | 0. | -3.741547 | -2.538731 | 1.073090  |
| 24. | 6. | 0. | -3.015748 | -2.595400 | -1.325653 |
| 25. | 6. | 0. | -3.485159 | -2.049513 | 2.285007  |
| 26. | 6. | 0. | -5.272684 | -1.719226 | -0.683940 |
| 27. | 8. | 0. | 3.458423  | 0.546652  | 0.776213  |
| 28. | 6. | 0. | 4.024082  | 1.860353  | 0.671092  |
| 29. | 6. | 0. | 3.862895  | 2.529051  | 2.026463  |
| 30. | 1. | 0. | -4.596959 | 3.513688  | -0.487750 |
| 31. | 1. | 0. | 0.114027  | 2.180295  | 0.604442  |
| 32. | 1. | 0. | -0.522912 | 4.562741  | 0.456269  |
| 33. | 1. | 0. | -2.840063 | 5.232634  | -0.096627 |
| 34. | 1. | 0. | -4.945024 | 0.726092  | -0.528879 |
| 35. | 1. | 0. | 0.251554  | 0.787173  | -1.445860 |
| 36. | 1. | 0. | -0.936604 | -1.774599 | 0.947987  |
| 37. | 1. | 0. | 4.400329  | -0.883742 | -2.148530 |
| 38. | 1. | 0. | 5.276688  | 0.322271  | -1.210637 |
| 39. | 1. | 0. | 5.886702  | -2.306902 | -0.785896 |
| 40. | 1. | 0. | 5.667282  | -1.261211 | 0.621935  |
| 41. | 1. | 0. | 3.743604  | -3.363310 | -0.430695 |
| 42. | 1. | 0. | 3.945252  | -2.788252 | 1.225228  |
| 43. | 1. | 0. | -3.991949 | -3.595775 | 0.973874  |
| 44. | 1. | 0. | -3.082099 | -2.102402 | -2.300657 |
| 45. | 1. | 0. | -1.960670 | -2.704683 | -1.069137 |
| 46. | 1. | 0. | -3.450112 | -3.596613 | -1.419480 |
| 47. | 1. | 0. | -3.222914 | -1.008158 | 2.445256  |
| 48. | 1. | 0. | -3.516508 | -2.688992 | 3.161701  |
| 49. | 1. | 0. | -5.886290 | -1.183382 | 0.047849  |
| 50. | 1. | 0. | -5.385358 | -1.249312 | -1.667821 |
| 51. | 1. | 0. | -5.675895 | -2.732963 | -0.758428 |
| 52. | 1. | 0. | 5.088491  | 1.796660  | 0.403832  |
| 53. | 1. | 0. | 3.522441  | 2.437189  | -0.115308 |
| 54. | 1. | 0. | 2.805218  | 2.621679  | 2.289050  |
| 55. | 1. | 0. | 4.306476  | 3.529570  | 2.009391  |
| 56. | 1. | 0. | 4.357532  | 1.943469  | 2.806720  |

| <b>4b-11</b>  |             | Standard Orientation<br>(Ångstroms) |          |          |          |
|---------------|-------------|-------------------------------------|----------|----------|----------|
| Center number | Atom number | Type                                | X        | Y        | Z        |
| 1.            | 6.          | 0.                                  | 3.391682 | 3.286367 | 0.208648 |



|     |    |    |           |           |           |
|-----|----|----|-----------|-----------|-----------|
| 2.  | 6. | 0. | 3.050543  | 1.935472  | 0.098451  |
| 3.  | 6. | 0. | 1.725175  | 1.495795  | -0.154828 |
| 4.  | 6. | 0. | 0.723683  | 2.465876  | -0.350024 |
| 5.  | 6. | 0. | 1.056657  | 3.810668  | -0.242337 |
| 6.  | 6. | 0. | 2.374699  | 4.218892  | 0.042160  |
| 7.  | 7. | 0. | 3.842270  | 0.809927  | 0.172031  |
| 8.  | 6. | 0. | 3.089444  | -0.328620 | -0.022080 |
| 9.  | 6. | 0. | 1.761043  | 0.044745  | -0.222124 |
| 10. | 6. | 0. | 3.780747  | -1.692043 | -0.030463 |
| 11. | 7. | 0. | -1.030376 | 0.133559  | 0.939731  |
| 12. | 6. | 0. | -0.615452 | -0.776502 | -0.048713 |
| 13. | 6. | 0. | 0.649198  | -0.847987 | -0.519152 |
| 14. | 6. | 0. | -2.319816 | 0.349551  | 1.342147  |
| 15. | 6. | 0. | -3.369691 | -0.321113 | 0.450775  |
| 16. | 7. | 0. | -2.891465 | -1.586070 | -0.059562 |
| 17. | 6. | 0. | -1.612614 | -1.802301 | -0.493151 |
| 18. | 6. | 0. | -4.670220 | -0.725768 | 1.155013  |
| 19. | 6. | 0. | -5.229256 | -1.809621 | 0.213870  |
| 20. | 6. | 0. | -3.977875 | -2.541365 | -0.315252 |
| 21. | 8. | 0. | -1.300119 | -2.795464 | -1.145142 |
| 22. | 8. | 0. | -2.615935 | 1.077687  | 2.280386  |
| 23. | 6. | 0. | 5.104946  | -1.573914 | 0.716032  |
| 24. | 6. | 0. | 3.977282  | -2.142531 | -1.495950 |
| 25. | 6. | 0. | 6.335139  | -1.654683 | 0.206441  |
| 26. | 6. | 0. | 2.943744  | -2.752430 | 0.730632  |
| 27. | 8. | 0. | -3.591475 | 0.520218  | -0.697113 |
| 28. | 6. | 0. | -4.131326 | 1.829896  | -0.475327 |
| 29. | 6. | 0. | -4.113561 | 2.553006  | -1.811963 |
| 30. | 1. | 0. | 4.413955  | 3.595392  | 0.406947  |
| 31. | 1. | 0. | -0.291119 | 2.169726  | -0.592914 |
| 32. | 1. | 0. | 0.287666  | 4.563805  | -0.385610 |
| 33. | 1. | 0. | 2.601870  | 5.277614  | 0.121567  |
| 34. | 1. | 0. | 4.837484  | 0.789249  | 0.335812  |
| 35. | 1. | 0. | -0.320100 | 0.658702  | 1.437009  |
| 36. | 1. | 0. | 0.814415  | -1.690046 | -1.183941 |
| 37. | 1. | 0. | -4.422693 | -1.137196 | 2.138315  |
| 38. | 1. | 0. | -5.345568 | 0.115510  | 1.312400  |
| 39. | 1. | 0. | -5.921351 | -2.487907 | 0.718186  |
| 40. | 1. | 0. | -5.764170 | -1.338424 | -0.615122 |
| 41. | 1. | 0. | -3.772006 | -3.473009 | 0.223155  |
| 42. | 1. | 0. | -4.035792 | -2.783935 | -1.379894 |
| 43. | 1. | 0. | 4.997122  | -1.415243 | 1.790085  |

|     |    |    |           |           |           |
|-----|----|----|-----------|-----------|-----------|
| 44. | 1. | 0. | 3.010268  | -2.247569 | -1.993874 |
| 45. | 1. | 0. | 4.564692  | -1.414933 | -2.063501 |
| 46. | 1. | 0. | 4.487843  | -3.110036 | -1.536948 |
| 47. | 1. | 0. | 6.522155  | -1.817345 | -0.850372 |
| 48. | 1. | 0. | 7.210141  | -1.578111 | 0.845191  |
| 49. | 1. | 0. | 2.757385  | -2.437542 | 1.761972  |
| 50. | 1. | 0. | 1.978210  | -2.930035 | 0.254752  |
| 51. | 1. | 0. | 3.491352  | -3.699743 | 0.755900  |
| 52. | 1. | 0. | -5.159647 | 1.761337  | -0.092981 |
| 53. | 1. | 0. | -3.540968 | 2.371864  | 0.273575  |
| 54. | 1. | 0. | -3.090781 | 2.644687  | -2.188400 |
| 55. | 1. | 0. | -4.536067 | 3.556961  | -1.704200 |
| 56. | 1. | 0. | -4.702104 | 2.006425  | -2.554384 |
